# Supplementary material
Source: PubMed Central journal article supplement (PMC7853211)
Supplement: jcsm.8988.ds001.pdf [file jcsm.8988.ds001.pdf]

# SUPPLEMENTAL MATERIAL – Behavioral and psychological treatments for chronic insomnia disorder in adults guideline meta-analyses and summary of findings tables

## All Literature Search Terms

### PICO 1 PubMed Search String:

((("Sleep Initiation and Maintenance Disorders"[MeSH Terms] OR "sleep initiation and maintenance disorders"[All Fields] OR "insomnia"[All Fields]) NOT "Insomnia, Fatal Familial"[MeSH Terms]) AND "humans"[MeSH Terms] AND "adult"[MeSH Terms] AND ("behavior therapy"[MeSH Terms] OR "behaviour therapy"[All Fields] OR "behavior therapy"[All Fields] OR "psychotherapy"[MeSH Terms] OR "psychotherapy"[All Fields] OR "psychotherap\*"[All Fields] OR "biofeedback, psychology"[MeSH Terms] OR "biofeedback"[All Fields] OR "psychology biofeedback"[All Fields] OR "biofeedback, psychology"[All Fields] OR "body monitoring"[All Fields] OR "BTII"[All Fields] OR "behavioral treatment"[All Fields] OR "cognitive therapy"[MeSH Terms] OR "cognitive therapy"[All Fields] OR "cognitive behaviour therapy"[All Fields] OR "cognitive behavior therapy"[All Fields] OR "cognitive behavior therapies"[All Fields] OR "cognitive behavioral therapy for insomnia"[All Fields] OR "CBT-I"[All Fields] OR "CBT-Insomnia"[All Fields] OR "sleep retraining"[All Fields] OR "mindfulness"[MeSH Terms] OR "mindfulness"[All Fields] OR "multicomponent behavioral therapy"[All Fields] OR "relaxation therapy"[MeSH Terms] OR "relaxation therapy"[All Fields] OR "relaxation therapies"[All Fields] OR "abdominal breathing"[All Fields] OR "deep breathing"[All Fields] OR "progressive muscle relaxation"[All Fields] OR "imagery"[All Fields] OR "imagery (psychotherapy)"[MeSH Terms] OR "imagery training"[All Fields] OR "special place imagery"[All Fields] OR "guided imagery"[All Fields] OR "autogenic training"[MeSH Terms] OR "autogenic training"[All Fields] OR "desensitization relaxation"[All Fields] OR "paradoxical intention"[All Fields] OR "sleep hygiene"[MeSH Terms] OR "sleep hygiene"[All Fields] OR "sleep restriction"[All Fields] OR "stimulus control"[All Fields]) AND English[lang] AND ("aged"[MeSH Terms] OR "elderly"[All Fields] OR "veterans" [MeSH Terms] OR "military family"[MeSH Terms] OR "active duty"[All Fields] OR "military personnel"[MeSH Terms] OR "sleep beliefs"[All Fields] OR "sleep anxiety"[All Fields] OR "self efficacy"[MeSH Terms] OR "self efficacy"[All Fields] OR "self-efficacy"[All Fields] OR "self concept"[MeSH Terms]OR "self concept"[All Fields]OR "self-concept"[All Fields] OR "performance anxiety"[MeSH Terms] OR "performance anxiety"[All Fields] OR "Comorbidity"[MeSH Terms] OR "comorbidities"[All Fields]) AND ("1900/01/01"[PDAT] : "2020/02/13"[PDAT]) NOT "Editorial"[Publication Type] NOT "Letter"[Publication Type] NOT "Comment"[Publication Type] NOT "Case Reports"[Publication Type] NOT "Biography"[Publication Type] NOT "Review"[Publication Type]

### PICO 1 PsychInfo Search String

SU.EXACT("Insomnia") AND (SU.EXACT("Behavior Therapy") OR SU.EXACT("Psychotherapy") OR SU.EXACT("Biofeedback") OR body monitoring OR bbt OR behavioral treatment OR SU.EXACT("Cognitive Therapy") OR SU.EXACT("Cognitive Behavior Therapy") OR cognitive behavior therapies OR cognitive behavioral therapy for insomnia OR cbt-I OR cbt-Insomnia OR sleep retraining OR SU.EXACT("Mindfulness") OR multicomponent behavioral therapy OR relaxation therapy OR relaxation therapies OR abdominal breathing OR deep breathing OR progressive muscle relaxation OR imagery OR imagery training OR special place imagery OR guided imagery OR autogenic training OR desensitization relaxation OR paradoxical intention OR sleep hygiene OR sleep restriction OR SU.EXACT("Stimulus Control")) AND (elderly OR SU.EXACT("Military Veterans") OR SU.EXACT("Military Duty Status") OR sleep beliefs OR sleep anxiety OR SU.EXACT("Self-Efficacy") OR self-concept OR SU.EXACT("Performance Anxiety") OR SU.EXACT("Comorbidity") OR comorbidities)

### PICO 2 PubMed Search String:

((("Sleep Initiation and Maintenance Disorders"[MeSH Terms] OR "sleep initiation and maintenance disorders"[All Fields] OR "insomnia"[All Fields]) NOT "Insomnia, Fatal Familial"[MeSH Terms]) AND "humans"[MeSH Terms] AND "adult"[MeSH Terms] AND ("behavior therapy"[MeSH Terms] OR "behaviour therapy"[All Fields] OR "behavior therapy"[All Fields] OR "psychotherapy"[MeSH Terms] OR "psychotherapy"[All Fields] OR "psychotherap\*"[All Fields] OR "biofeedback, psychology"[MeSH Terms] OR "biofeedback"[All Fields] OR "psychology biofeedback"[All Fields] OR "biofeedback, psychology"[All Fields] OR "body monitoring"[All Fields] OR "BBTI"[All Fields] OR "behavioral treatment"[All Fields] OR "cognitive therapy"[MeSH Terms] OR "cognitive therapy"[All Fields] OR "cognitive behaviour therapy"[All Fields] OR "cognitive behavior therapy"[All Fields] OR "cognitive behavior therapies"[All Fields] OR "cognitive behavioral therapy for insomnia"[All Fields] OR "CBT-I"[All Fields] OR "CBT-Insomnia"[All Fields] OR "sleep retraining"[All Fields] OR "mindfulness"[MeSH Terms] OR "mindfulness"[All Fields] OR "multicomponent behavioral therapy"[All Fields] OR "relaxation therapy"[MeSH Terms] OR "relaxation therapy"[All Fields] OR "relaxation therapies"[All Fields] OR "abdominal breathing"[All Fields] OR "deep breathing"[All Fields] OR "progressive muscle relaxation"[All Fields] OR "imagery"[All Fields] OR "imagery (psychotherapy)"[MeSH Terms] OR "imagery training"[All Fields] OR "special place imagery"[All Fields] OR "guided imagery"[All Fields] OR "autogenic training"[MeSH Terms] OR "autogenic training"[All Fields] OR "desensitization relaxation"[All Fields] OR "paradoxical intention"[All Fields] OR "sleep hygiene"[MeSH Terms] OR "sleep hygiene"[All Fields] OR "sleep restriction"[All Fields] OR "stimulus control"[All Fields]) AND ("in-person"[All Fields] OR "self-help groups" [MeSH Terms] OR "group" [All Fields] OR "psychotherapy, group"[MeSH Terms] OR "computer-assisted instruction"[Mesh] OR "computer-assisted instruction"[All Fields] OR "computer-based"[All Fields] OR "internet" [MeSH Terms] OR "internet-delivered"[All Fields] OR "internet-based" [All Fields] OR "web-based" [All Fields] OR "mobile applications"[MeSH Terms] OR "mobile applications"[All Fields] OR "mobile app"[All Fields] OR "telecommunications"[MeSH Terms] OR "telephone" [MeSH Terms] OR "telephone" [All Fields] OR "telephone-based"[All Fields] OR "telemedicine"[MeSH Terms] OR "telemedicine"[All Fields] OR "social networking"[MeSH Terms] OR "social networking"[All Fields] OR "social networks"[All Fields] OR "social community"[All Fields] OR "online communities"[All Fields] OR "videoconferencing"[MeSH Terms] OR "videoconferencing"[All Fields] OR "bibliotherapy"[MeSH Terms] OR "bibliotherapy"[All Fields] OR "bibliotherapies"[All Fields] OR "self-help"[All Fields] OR "community-based"[All Fields]) AND English[lang] AND ("1900/01/01"[PDAT] : "2020/02/12"[PDAT]) NOT "Editorial"[Publication Type] NOT "Letter"[Publication Type] NOT "Comment"[Publication Type] NOT "Case Reports"[Publication Type] NOT "Biography"[Publication Type] NOT "Review"[Publication Type]

## **PICO 2 PsychInfo Search String**

SU.EXACT("Insomnia") AND (SU.EXACT("Behavior Therapy") OR SU.EXACT("Psychotherapy") OR SU.EXACT("Biofeedback") OR body monitoring OR bbt OR behavioral treatment OR SU.EXACT("Cognitive Therapy") OR SU.EXACT("Cognitive Behavior Therapy") OR cognitive behavior therapies OR cognitive behavioral therapy for insomnia OR cbt-I OR cbt-Insomnia OR sleep retraining OR SU.EXACT("Mindfulness") OR multicomponent behavioral therapy OR relaxation therapy OR relaxation therapies OR abdominal breathing OR deep breathing OR progressive muscle relaxation OR imagery OR imagery training OR special place imagery OR guided imagery OR autogenic training OR desensitization relaxation OR paradoxical intention OR sleep hygiene OR sleep restriction OR SU.EXACT("Stimulus Control")) AND (SU.EXACT("Group Psychotherapy") OR in-person OR self-help groups OR group SU.EXACT("Computer Assisted Instruction") OR computer-based OR SU.EXACT("Internet") OR internet-delivered OR internet-based OR web-based OR mobile applications OR mobile applications OR mobile app OR telecommunications OR telephone OR telephone-based OR SU.EXACT("Telemedicine") OR SU.EXACT("Social Networks") OR SU.EXACT("Online Social Networks") OR social community OR online communities OR videoconferencing OR SU.EXACT("Bibliotherapy") OR bibliotherapies OR SU.EXACT("Self-Help Techniques") OR community-based)

**Exclusion Criteria:** Exclusion criteria are applied during the abstract review of all retrieved publications. Studies that meet any of the exclusion criteria are rejected from the systematic review.

### **A. Publication type**

1. Conference abstracts
2. Editorials
3. Review
4. Methods

### **B. Study type**

1. Animal research
2. Case reports
3. Case series

### **C. Language non-English**

### **D. Sample size < 20**

### **E. Diagnosis NOT chronic insomnia disorder**

### **F. Patient population < 18 years of age**

### **G. Main study objective is NOT evaluating the efficacy/effectiveness of psychological and behavioral therapies for insomnia**

### **H. Does NOT include one of the following interventions of interest:**

1. Biofeedback
2. Behavioral treatment for insomnia
3. Brief therapies for insomnia
4. Cognitive behavioral therapy for insomnia
5. Intensive sleep retraining
6. Mindfulness
7. Multicomponent behavioral therapy for insomnia
8. Relaxation therapy
9. Paradoxical intention treatment
10. Sleep hygiene
11. Sleep restriction
12. Stimulus control

**Inclusion Criteria:** Inclusion criteria are applied during the full publication review of all publications that were not rejected during the abstract review. Studies that meet all inclusion criteria will be accepted as evidence to use in the systematic review.

**A. Intervention and control condition comparisons**

| Any of the following behavioral and psychological <u>interventions</u> (must meet at least 1):                                                                                                                                                                                                                                                                                                                                                                                                                                                                                                                    | Compared to any of the following <u>control conditions</u> (must meet at least 1):                                                                                                                                                         |
|-------------------------------------------------------------------------------------------------------------------------------------------------------------------------------------------------------------------------------------------------------------------------------------------------------------------------------------------------------------------------------------------------------------------------------------------------------------------------------------------------------------------------------------------------------------------------------------------------------------------|--------------------------------------------------------------------------------------------------------------------------------------------------------------------------------------------------------------------------------------------|
| <ol style="list-style-type: none"> <li>1. Biofeedback</li> <li>2. Cognitive behavioral therapy-insomnia (i.e., Cognitive therapy, Sleep restriction, and Stimulus control)</li> <li>3. Brief therapies for Insomnia (BTI-I, Brief CBT-I)</li> <li>4. Intensive sleep retraining</li> <li>5. Mindfulness</li> <li>6. Multicomponent behavioral therapy for insomnia</li> <li>7. Relaxation therapy (i.e., Abdominal breathing, Imagery training, Autogenic training)</li> <li>8. Paradoxical intention treatment</li> <li>9. Sleep hygiene</li> <li>10. Sleep restriction</li> <li>11. Stimulus control</li> </ol> | <ol style="list-style-type: none"> <li>1. Attention control</li> <li>2. Pharmacologic –placebo drug</li> <li>3. Quasi-desensitization</li> <li>4. Sleep hygiene or sleep education</li> <li>5. Usual care</li> <li>6. Wait-list</li> </ol> |

**B. Intervention delivery method (must meet at least 1)**

1. In-person one-on-one visit with a trained CBT-I specialist
2. In-person one-on-one visit with provider who is not a trained behavioral and psychological specialist
3. Group behavioral and psychological
4. Telephone
5. Self-help book
6. Internet-delivered
7. Community-based workshop
8. Telemedicine (videoconferencing, etc.)

**C. Outcomes of interest (must meet at least 1)**

1. Beliefs and attitudes about sleep (important)
2. Daytime fatigue domain (important)
3. Insomnia severity (important)
4. Nights with hypnotic use (important)
5. Number of nighttime awakenings (important)
6. Quality of sleep (critical)
7. Remission rate (critical)
8. Responder rate (critical)
9. Sleep efficiency (important)
10. Sleep latency (critical)
11. Total wake time (important)
12. Total sleep time (important)
13. Wake after sleep onset (critical)

**D. Insomnia diagnosis (must meet at least 1)**

1. Use of any of the 3 diagnostic systems, regardless of version: DSM, ICSD, RDC
2. Use of validated sleep instruments in combination with quantitative objective/subjective measure and insomnia complaints (e.g. PSQI and actigraphy or diary-assessed SOL>30 minutes for >=3 nights a week)
3. Other sleep complaints/criteria/symptoms that would require adjudication

## Abbreviations:

AASM- American Academy of Sleep Medicine  
BTIBTIs- Brief Therapies for Insomnia  
CBT-I- Cognitive Behavioral Therapy for Insomnia  
CPG- Clinical practice guideline  
DBAS- Dysfunctional Beliefs and Attitudes about Sleep scale  
FFS-Flinders Fatigue Scale  
FSI- Fatigue symptom index  
FSS- Fatigue severity scale  
GRADE- Grading of Recommendations Assessment, Development, and Evaluation  
IQR- Interquartile range  
ISI- Insomnia Severity Index  
ISQ- Insomnia Severity Questionnaire  
ISR- Intensive Sleep Retraining  
MFI- Multidimensional Fatigue Inventory  
PI: Paradoxical Intention  
PICO – Patient, intervention, comparator, outcome  
POMS-F- Profile of Mood States Fatigue subscale  
PSG- Polysomnography  
PSQI – Pittsburgh sleep quality index  
RCT- Randomized controlled trial  
SD- Standard deviation  
SE- Standard error  
SMD- Standardized mean-difference  
SR- Systematic review  
RT- Relaxation therapy  
TF- Task force  
WASO- Wake after sleep onset

# Cognitive Behavioral Therapy (CBT-I)

## CBT-I vs. Control

### Quality of sleep

**Figure S1.** Diary-determined quality of sleep, post treatment differences, CBT-I vs. control

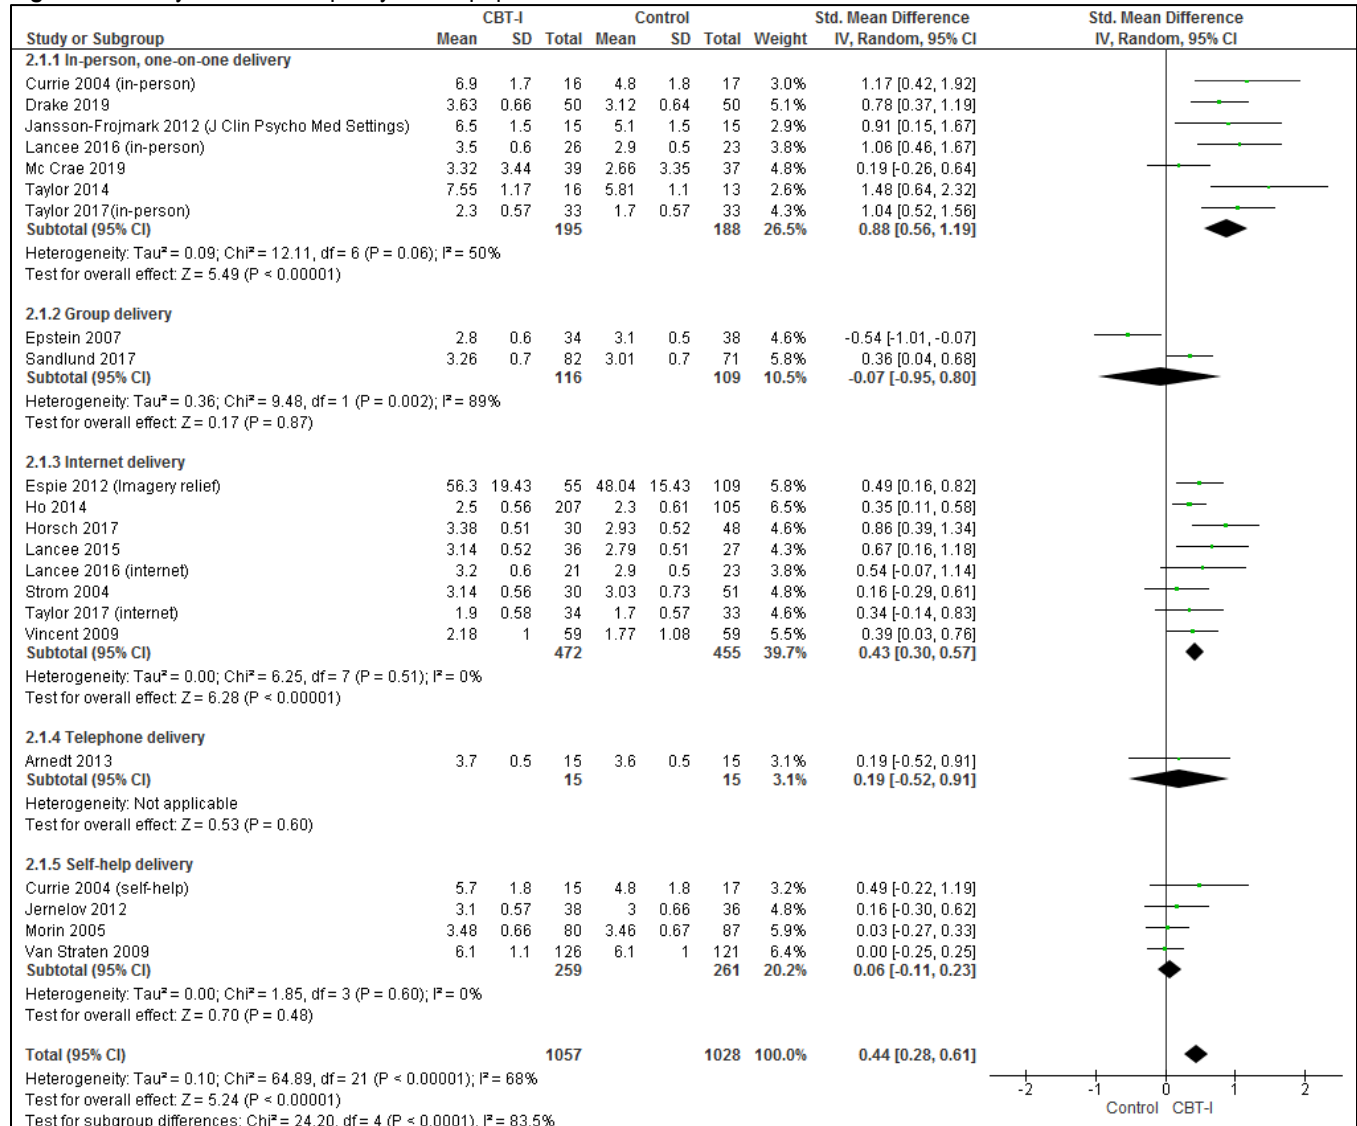

\*Currie 2004 (in-person and self) use same control data

Espie 2012 (imagery and usual care pooled control data)

Lancee 2016 (in-person and internet) use same control data

Taylor 2017 (in-person and internet) use same control data

Ho 2014 (pooled results for self-help with and without tel. support, SE converted to SD, diary scores flipped as lower scores indicate improvement)

Quality of sleep: Insomnia and no comorbidities

**Table S1.** Diary-determined quality of sleep, post treatment differences, CBT-I vs. control

| Study       | Delivery method                | CBT-I |      |       | Control |      |       | Std. Mean Difference, [95% CI] |
|-------------|--------------------------------|-------|------|-------|---------|------|-------|--------------------------------|
|             |                                | Mean  | SD   | Total | Mean    | SD   | Total |                                |
| Taylor 2014 | In-person, one-on-one delivery | 7.55  | 1.17 | 16    | 5.81    | 1.1  | 13    | 1.48 [0.64, 2.32]              |
| Strom 2004  | Internet delivery              | 3.14  | 0.56 | 30    | 3.03    | 0.73 | 51    | 0.16 [-0.29, 0.61]             |

Quality of sleep: Insomnia and comorbid psychiatric conditions

**Table S2.** Diary-determined quality of sleep, post treatment differences, CBT-I vs. control

| Study       | Delivery method                              | CBT-I |      |       | Control |     |       | Std. Mean Difference, [95% CI] |
|-------------|----------------------------------------------|-------|------|-------|---------|-----|-------|--------------------------------|
|             |                                              | Mean  | SD   | Total | Mean    | SD  | Total |                                |
| Currie 2004 | In-person, one-on-one and self-help (pooled) | 6.32  | 1.75 | 31    | 4.8     | 1.8 | 17    | 0.85 [0.23, 1.46]              |

Quality of sleep: Insomnia and comorbid medical conditions

**Figure S2.** Diary-determined quality of sleep, post treatment differences, CBT-I vs. control

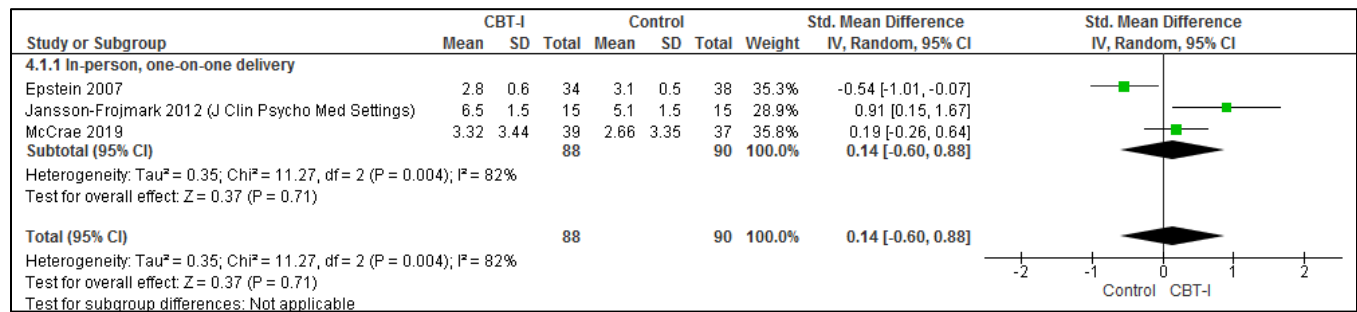

## Quality of sleep: PSQI

**Figure S3.** PSQI-determined quality of sleep, post treatment differences, CBT-I vs. control

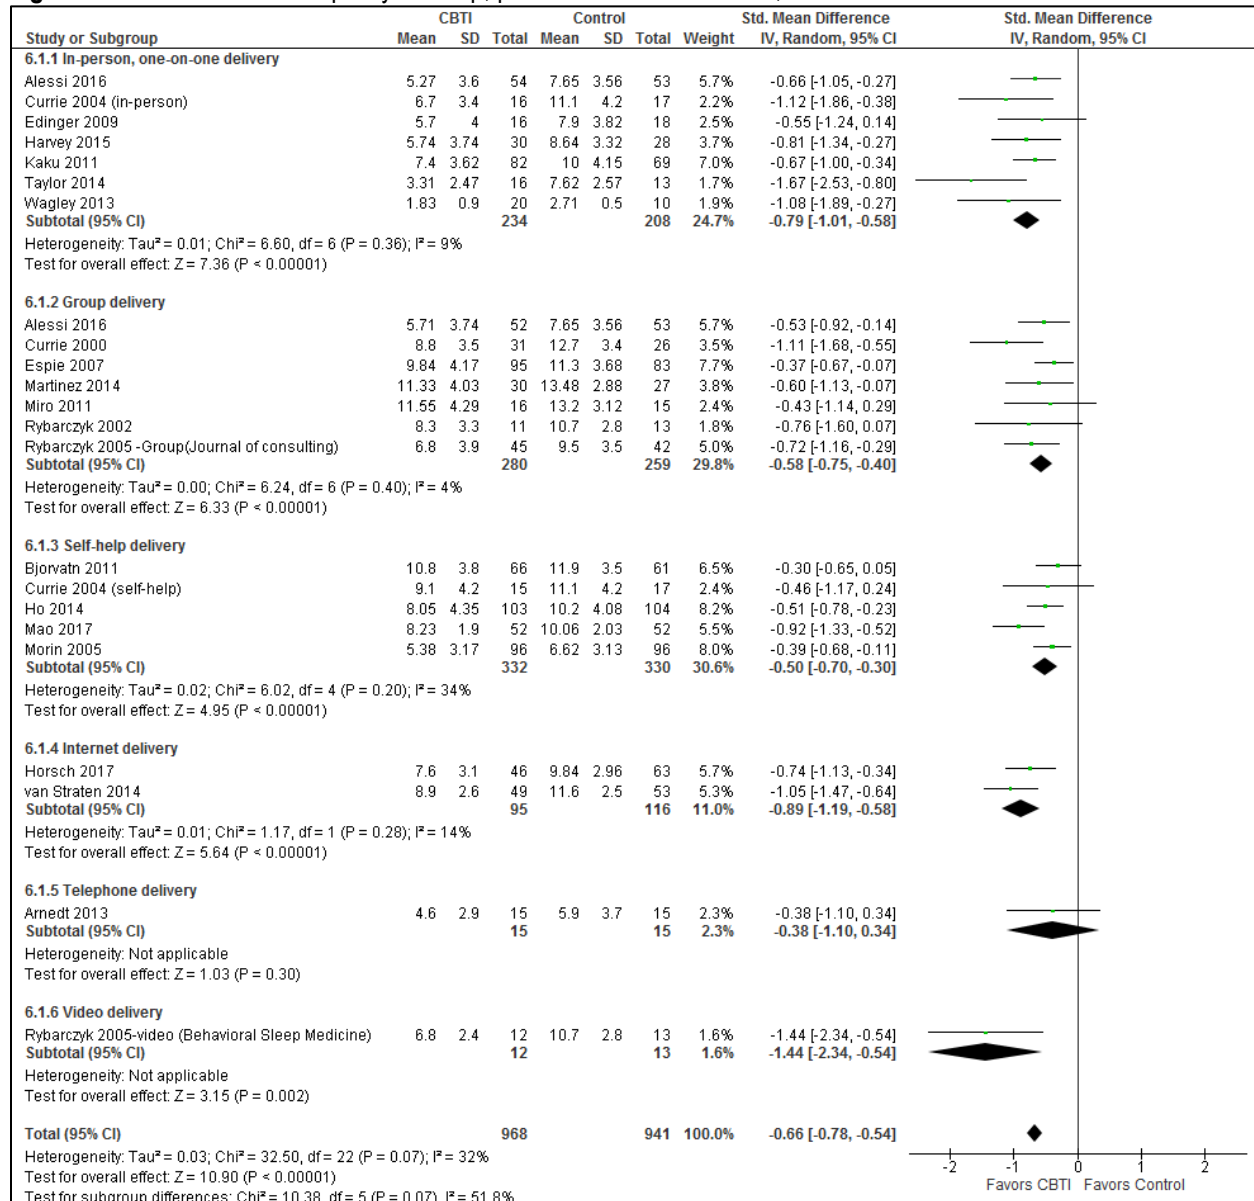

\*Currie 2004 (in-person and self) use same control

\*Morin 2005 SD calculated from 95%CI

\*Alessi 2016 (in-person and group) use same control, SE converted to SD

## Quality of sleep (PSQI): Insomnia and no comorbidities

**Table S3.** PSQI-determined quality of sleep, post treatment differences, CBT-I vs. control

| Study        | Delivery method       | CBT-I |      |       | Control |      |       | Std. Mean Difference, [95% CI] |
|--------------|-----------------------|-------|------|-------|---------|------|-------|--------------------------------|
|              |                       | Mean  | SD   | Total | Mean    | SD   | Total |                                |
| Edinger 2009 | In-person, one-on-one | 5.7   | 4    | 16    | 7.9     | 3.82 | 18    | -0.55[-1.24, 0.14]             |
| Taylor 2014  | In-person, one-on-one | 3.31  | 2.47 | 16    | 7.62    | 2.57 | 13    | -1.67[-2.53, -0.80]            |

Quality of sleep (PSQI): Insomnia and comorbid psychiatric conditions

Figure S4. PSQI-determined quality of sleep, post treatment differences, CBT-I vs. control

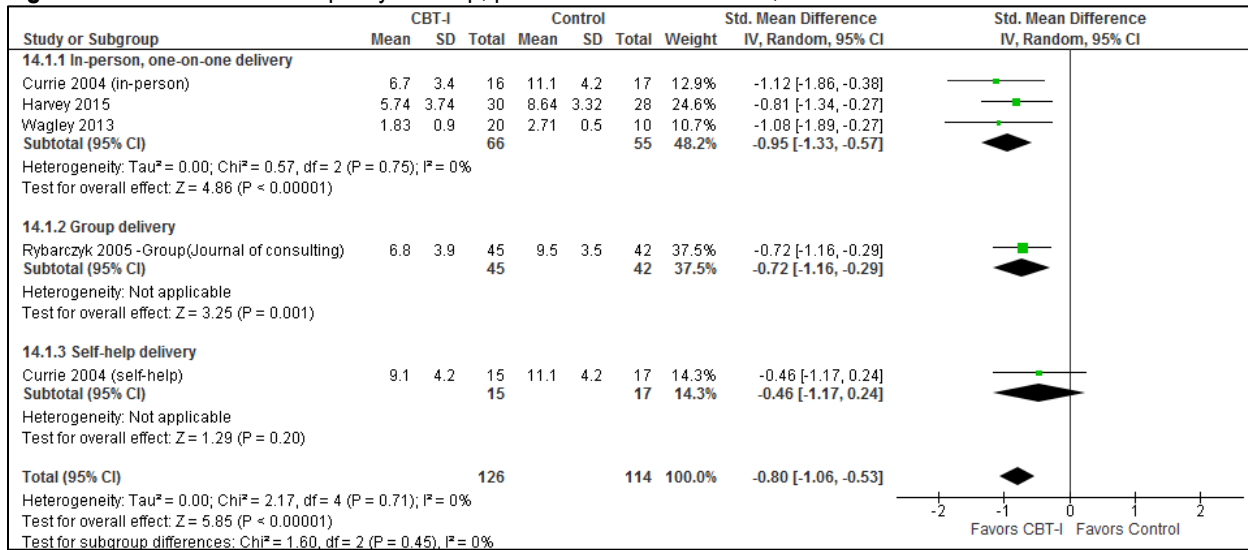

Quality of sleep (PSQI): Insomnia and comorbid medical conditions

Figure S5. PSQI-determined quality of sleep, post treatment differences, CBT-I vs. control

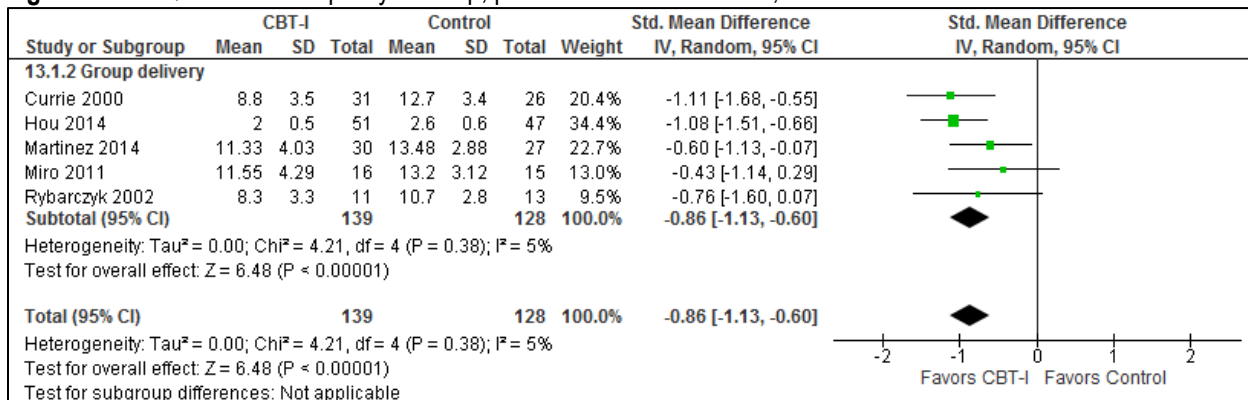



## Quality of sleep (Diary): In-person delivery vs. comparison

**Figure S6.** Diary-determined quality of sleep, post treatment differences for in-person delivery

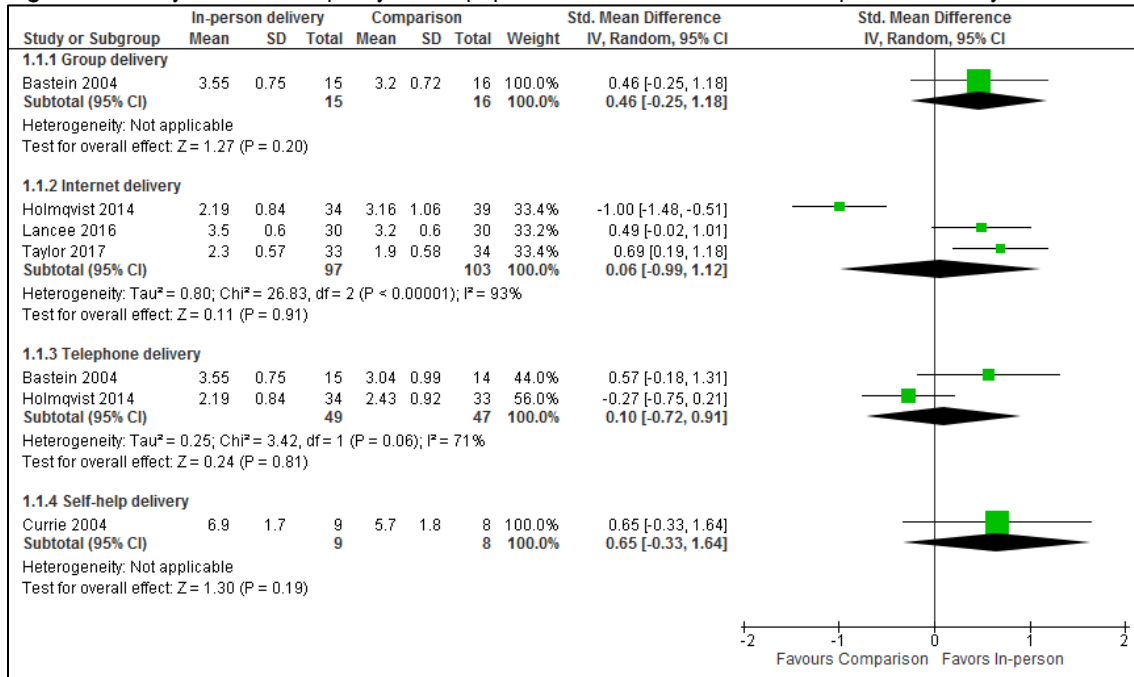

\* each subgroup of delivery method is reported separately in the results section

## Quality of sleep (PSQI): In-person delivery vs. comparison

**Figure S7.** PSQI-determined quality of sleep, post treatment differences for in-person delivery

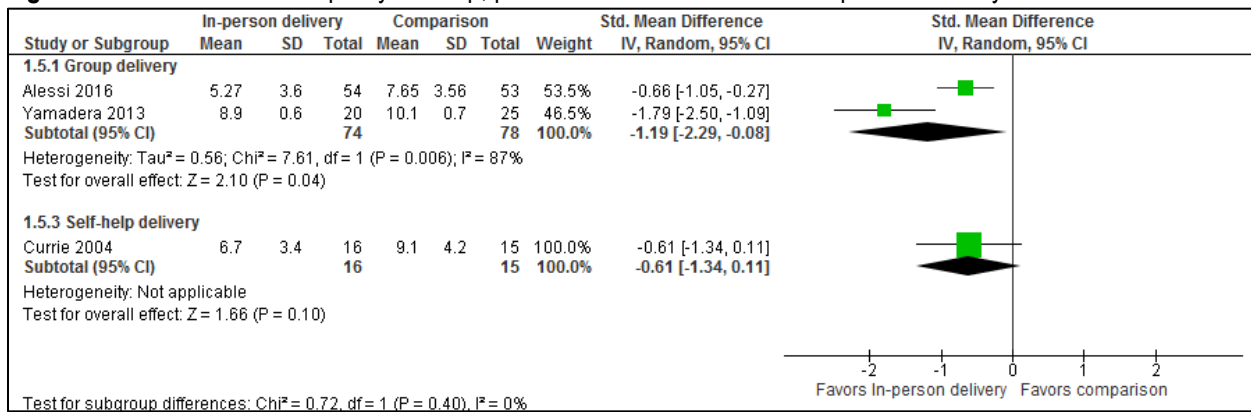

Test for subgroup differences: Chi<sup>2</sup> = 0.72, df = 1 (P = 0.40); I<sup>2</sup> = 0%

# Sleep latency (Diary)

**Figure S8. Diary-determined sleep latency (minutes), post treatment differences, CBT-I vs. control**

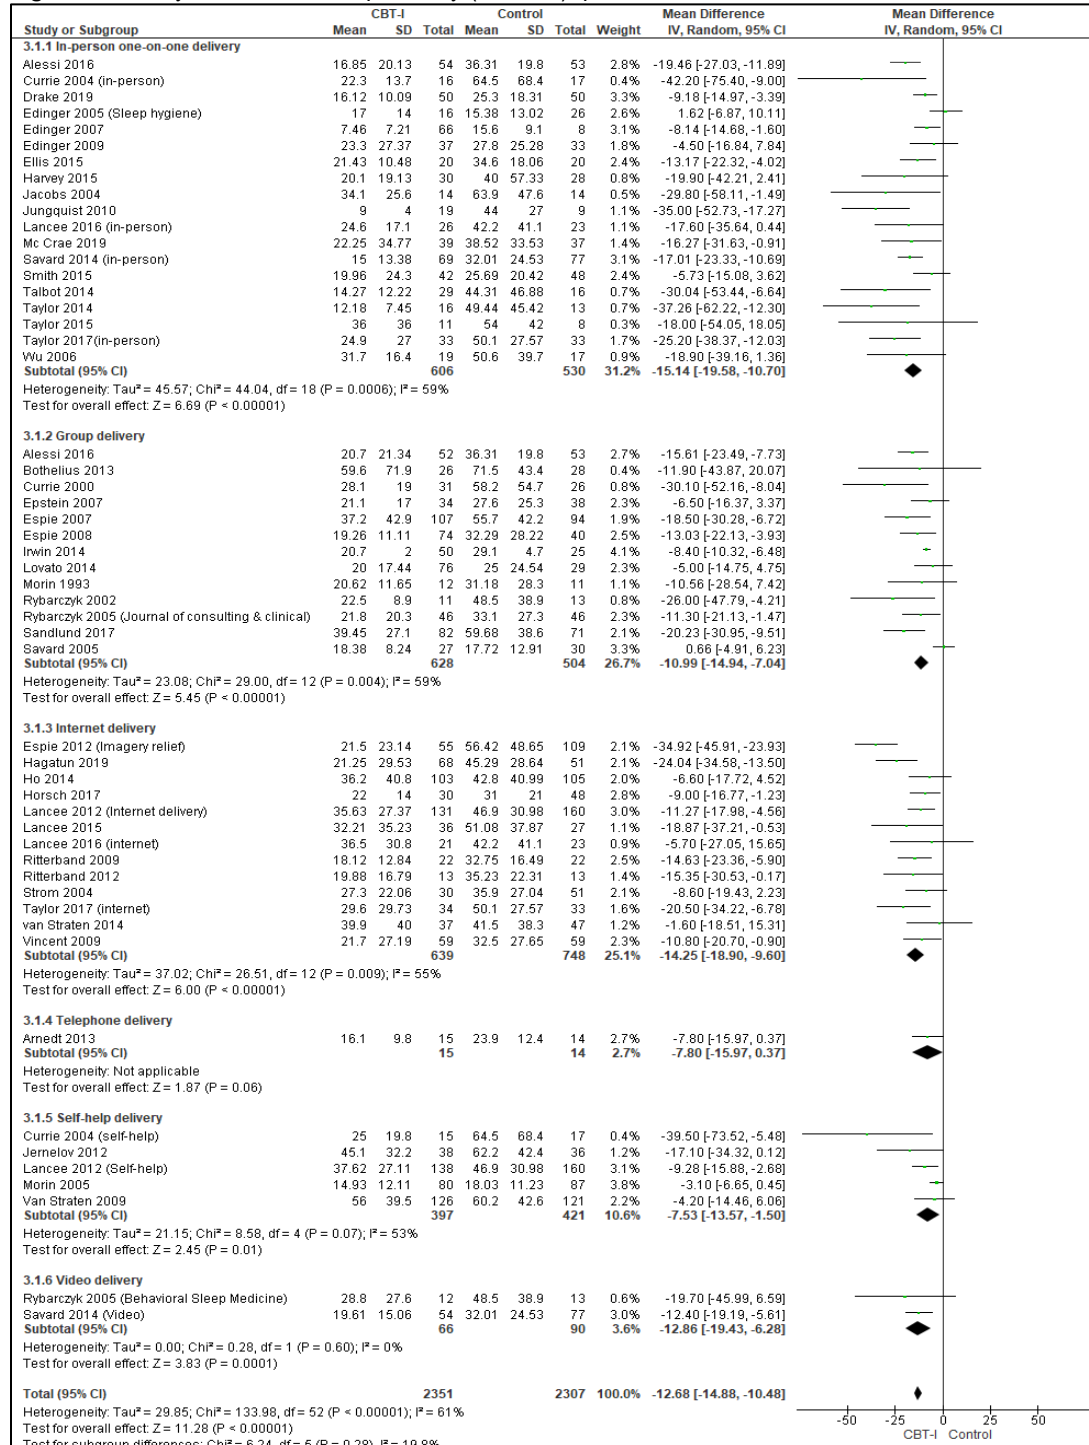

\*Currie 2004 (in-person and self) uses same control data  
 Espie 2012 (imagery and usual care control data pooled)  
 Lancee 2016 (in-person and internet) uses same control data  
 Edinger 2005 (usual care and sleep hygiene control data pooled)  
 Savard 2014 (in-person and video) uses same control data  
 Lancee 2012 (internet and self-help) uses same control data  
 Taylor 2017 (in-person and internet) uses same control data  
 Alessi 2016 (in-person and group) uses same control data, SE converted to SD

Sleep latency (Diary): Insomnia and no comorbidities

Figure S9. Diary-determined sleep latency (minutes), post treatment differences, CBT-I vs. control

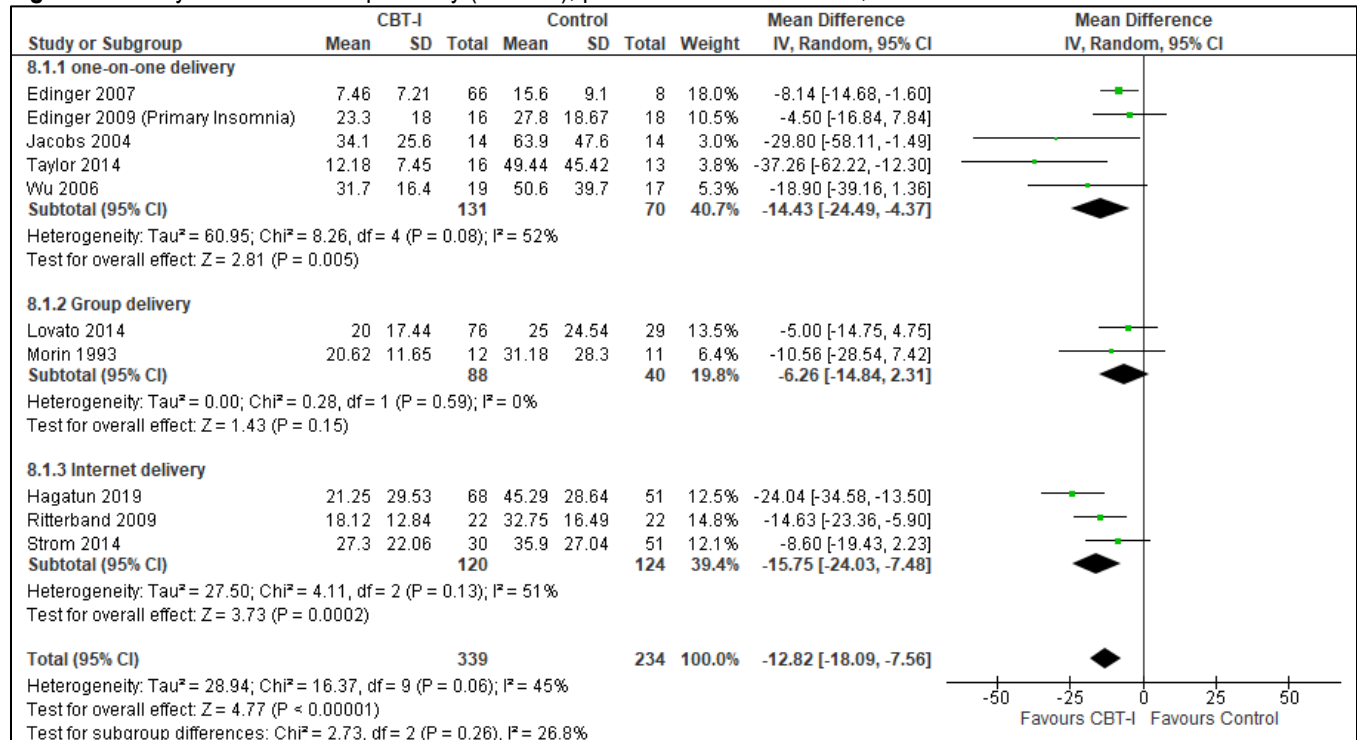

Sleep latency (Diary): Insomnia and comorbid psychiatric conditions

Figure S10. Diary-determined sleep latency (minutes), post treatment differences, CBT-I vs. control

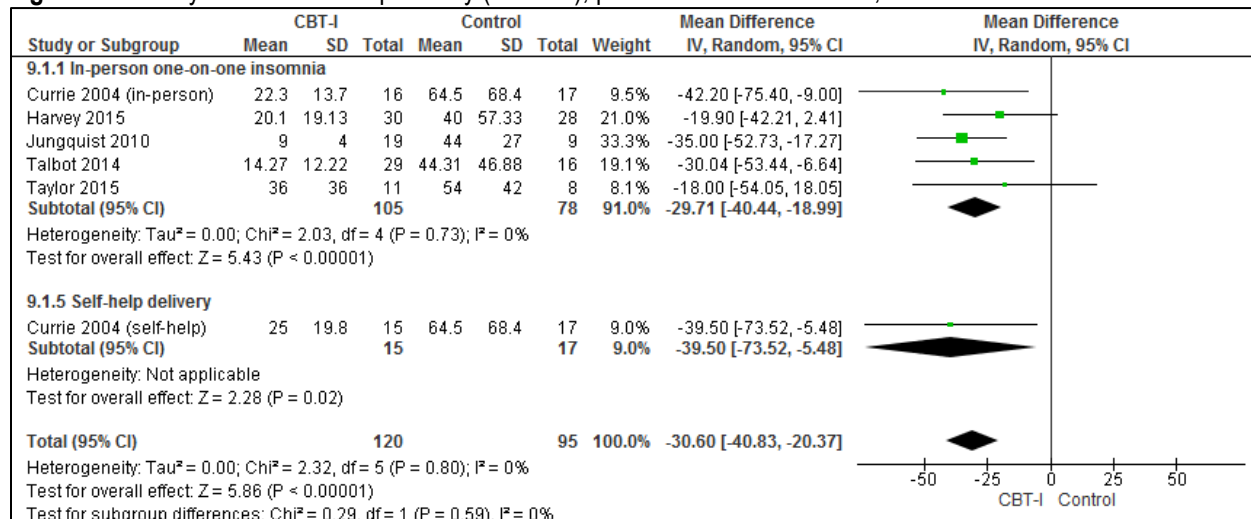

\*Currie 2004 (in-person and self) uses same control data

Sleep latency (Diary): Insomnia and comorbid medical conditions

Figure S11. Diary-determined sleep latency (minutes), post treatment differences, CBT-I vs. control

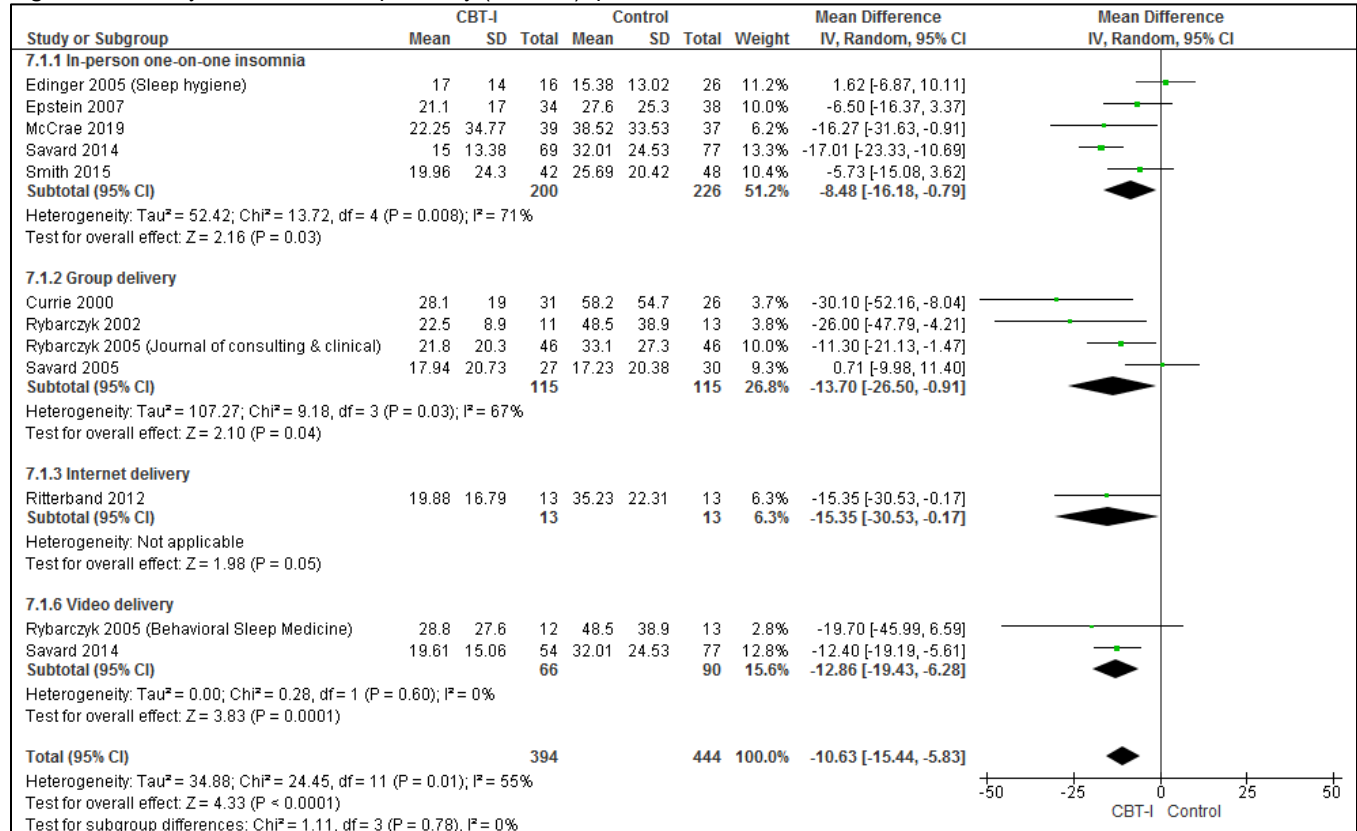

\*Edinger 2005 (usual care and sleep hygiene control data pooled)

\*Savard 2014 (in-person and video) uses same control data

Sleep latency (PSG)

Figure S12. PSG-determined sleep latency (minutes), post treatment differences, CBT-I vs. control

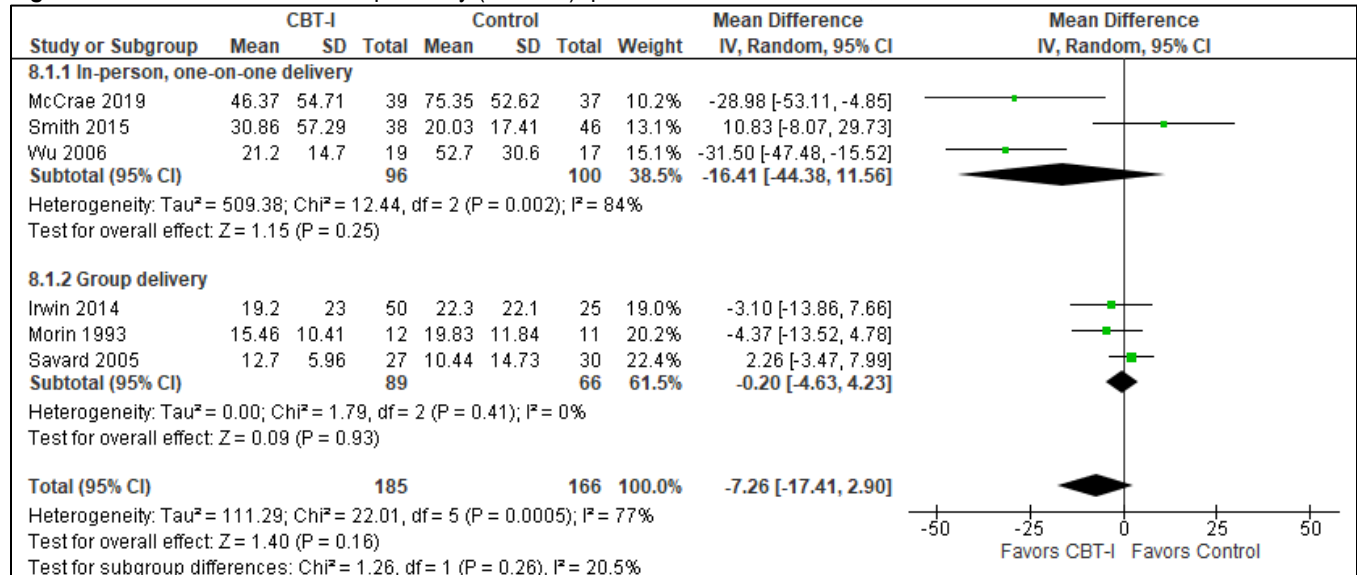

Sleep latency (PSG): Insomnia and no comorbidities

**Table S4.** PSG-determined sleep latency (minutes), post treatment differences, CBT-I vs. control

| Study      | Delivery method       | CBT-I |       |       | Control |       |       | Mean Difference, [95% CI] |
|------------|-----------------------|-------|-------|-------|---------|-------|-------|---------------------------|
|            |                       | Mean  | SD    | Total | Mean    | SD    | Total |                           |
| Wu 2006    | In-person, one-on-one | 21.2  | 14.7  | 19    | 52.7    | 30.6  | 17    | -31.50[-47.48, -15.52]    |
| Morin 1993 | Group delivery        | 15.46 | 10.41 | 12    | 19.83   | 11.84 | 11    | -4.37[-13.52, 4.78]       |

Sleep latency (PSG): Insomnia and comorbid medical conditions

**Figure S13.** PSG-determined sleep latency (minutes), post treatment differences, CBT-I vs. control

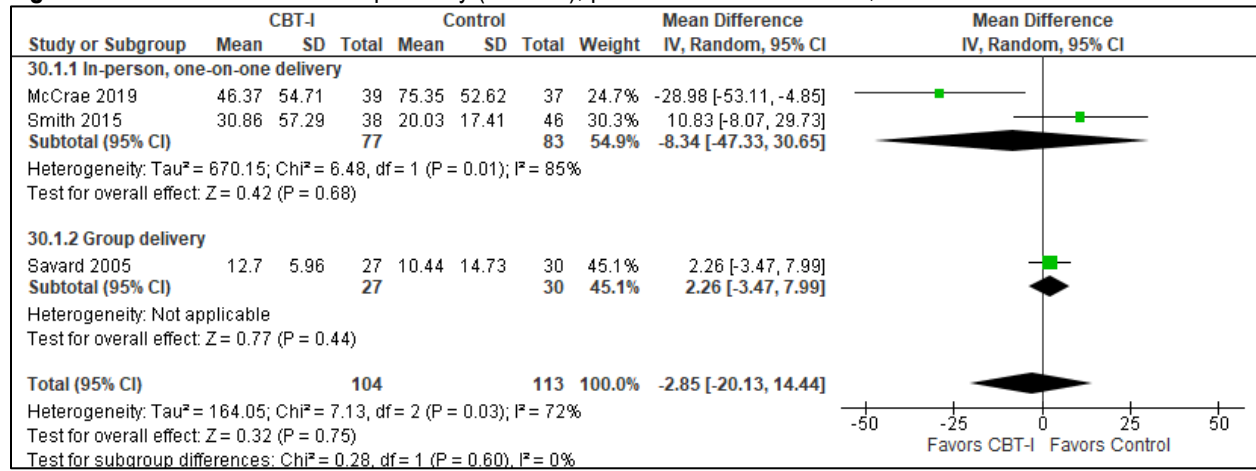

## Sleep latency: In-person delivery vs. comparison

**Figure S14.** Diary-determined sleep latency (minutes), post treatment differences for in-person delivery

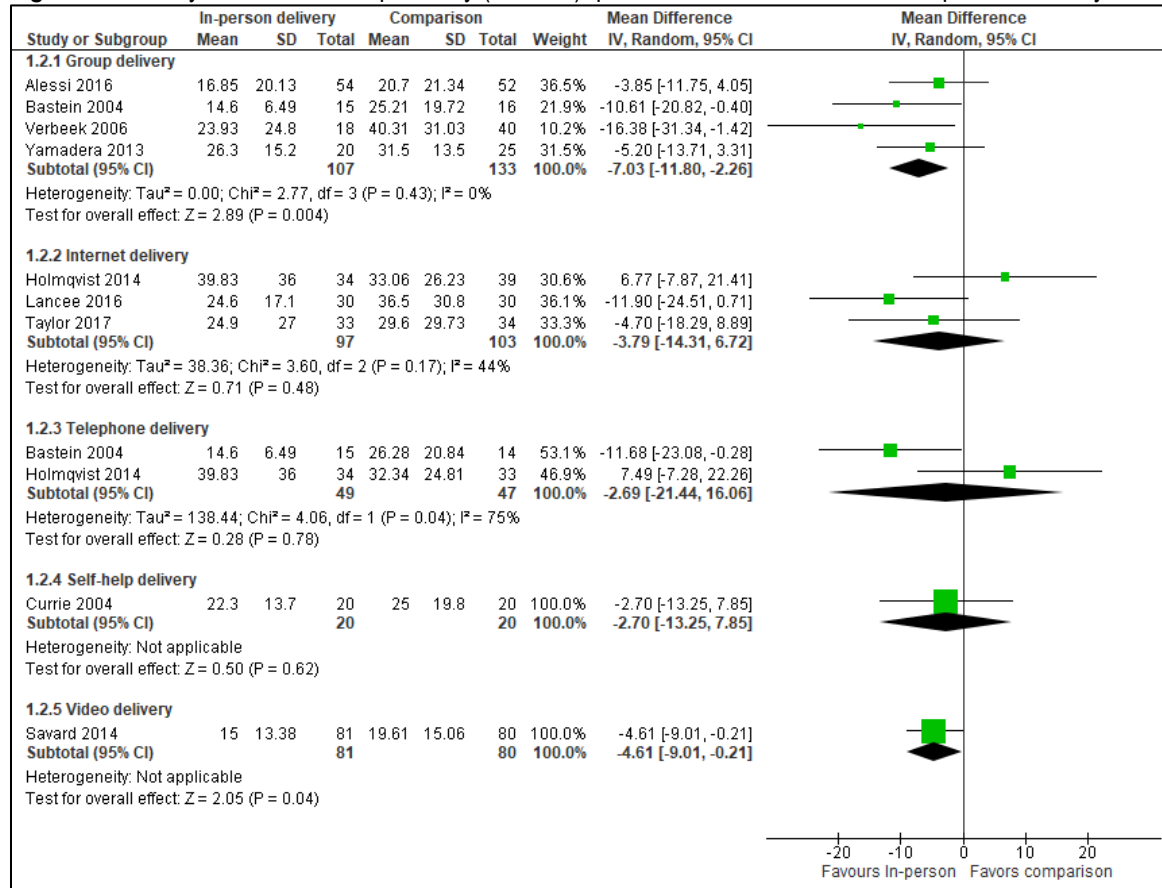

\* each subgroup of delivery method is reported separately in the results section

# Wake after sleep onset

## Figure S15. Diary-determined WASO (minutes), post treatment differences, CBT-I vs. control

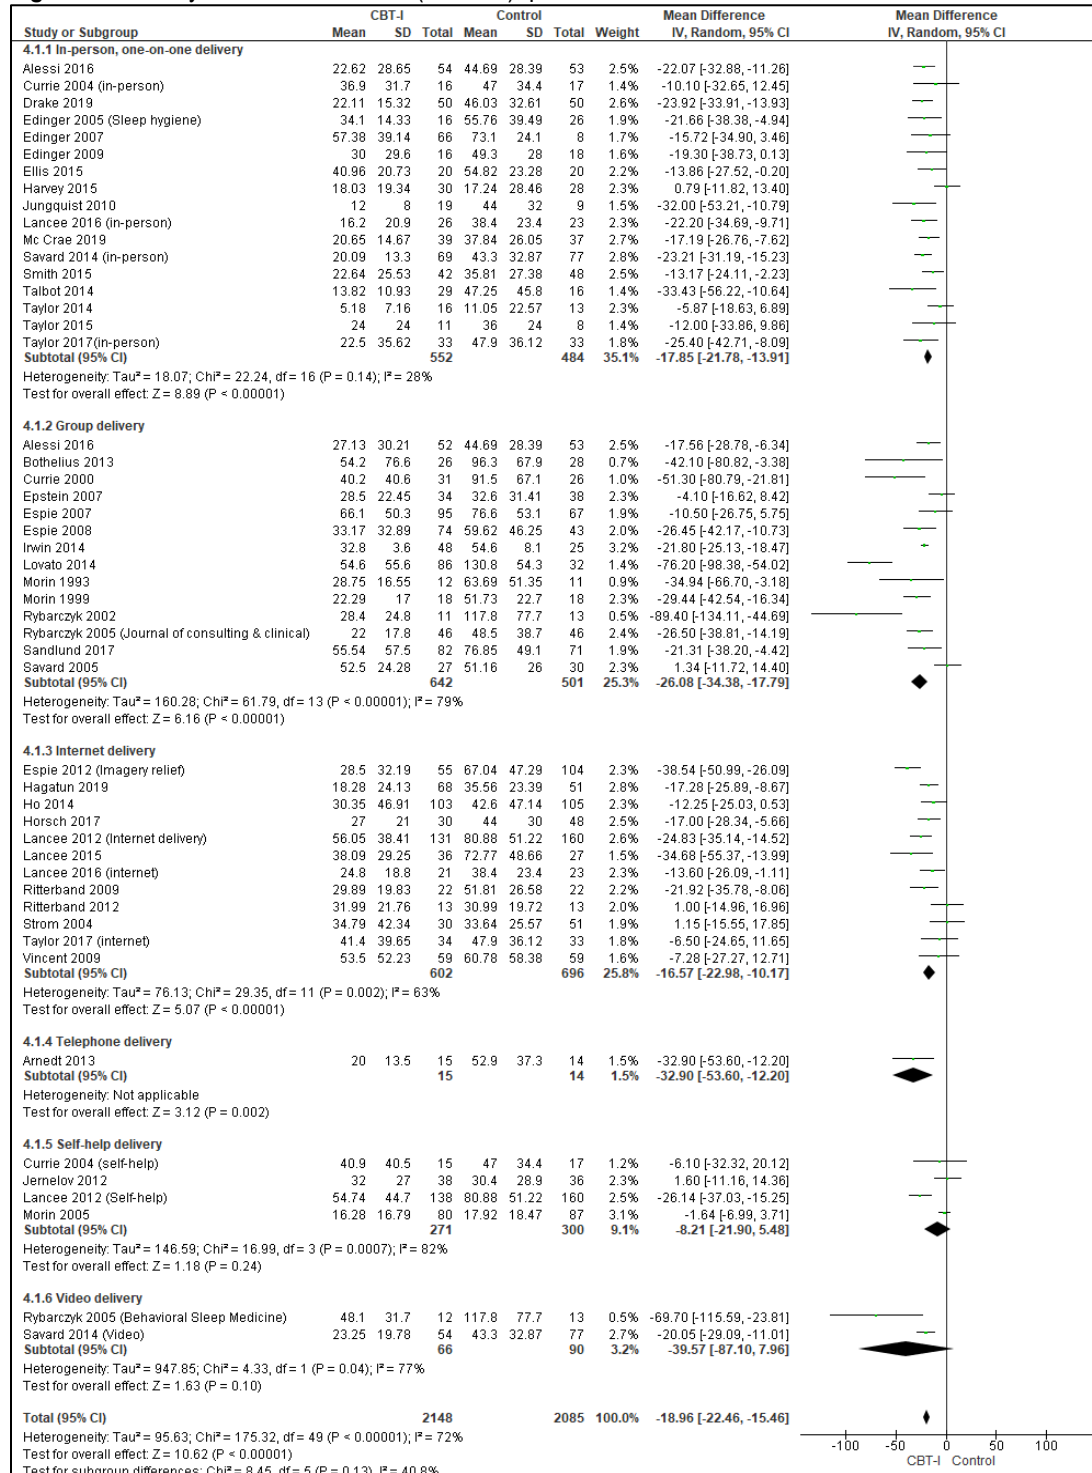

\*Currie 2004 (in-person and self) uses same control data  
 Espie 2012 imagery and usual care control groups pooled data  
 Lancee 2016 (in-person and internet) uses same control data  
 Edinger 2005 usual care and sleep hygiene pooled control data  
 Savard 2014 (in-person and video) uses same control data  
 Lancee 2012 (internet and self-help) uses same control data  
 Taylor 2017 (in-person and internet) uses same control data  
 Alessi 2016 (in-person and group) uses same control data, SE converted SD

Wake after sleep onset (Diary): Insomnia and no comorbidities

Figure S16. Diary-determined WASO (minutes), post treatment differences, CBT-I vs. control

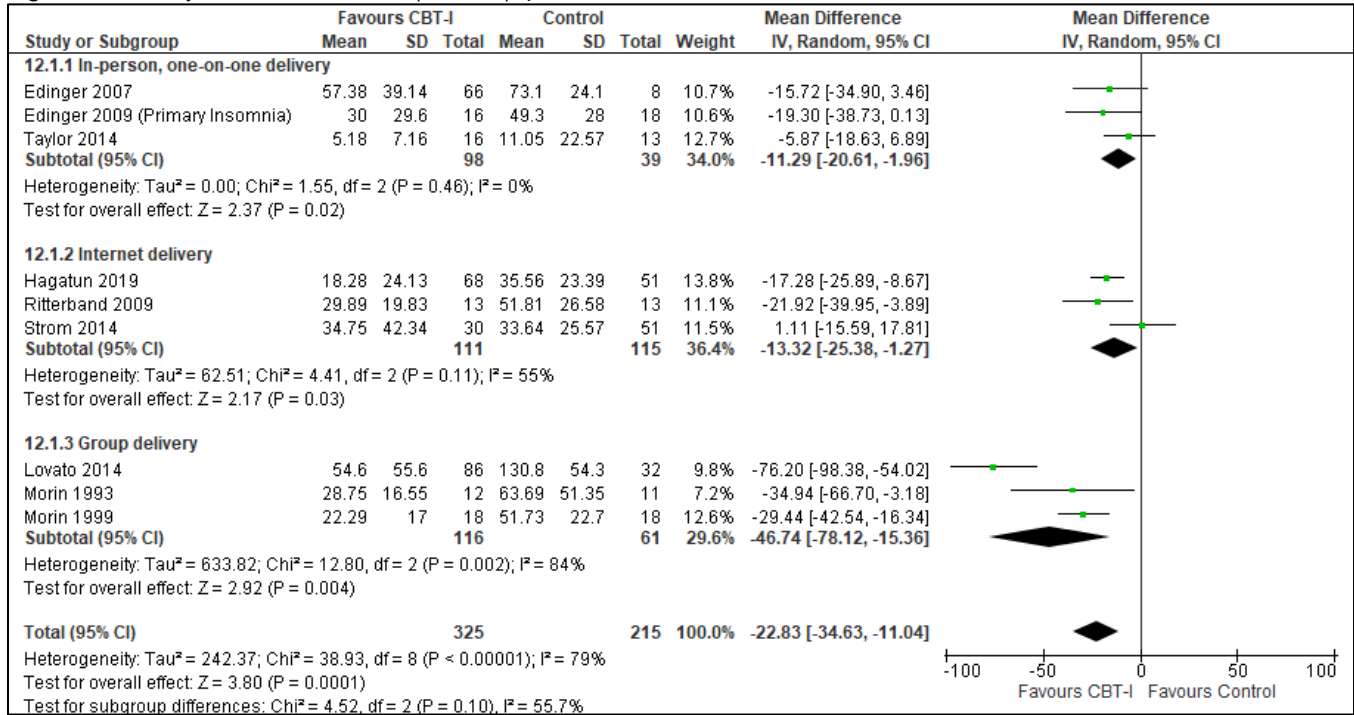

Wake after sleep onset (Diary): Insomnia and comorbid psychiatric conditions

Figure S17. Diary-determined WASO (minutes), post treatment differences, CBT-I vs. control

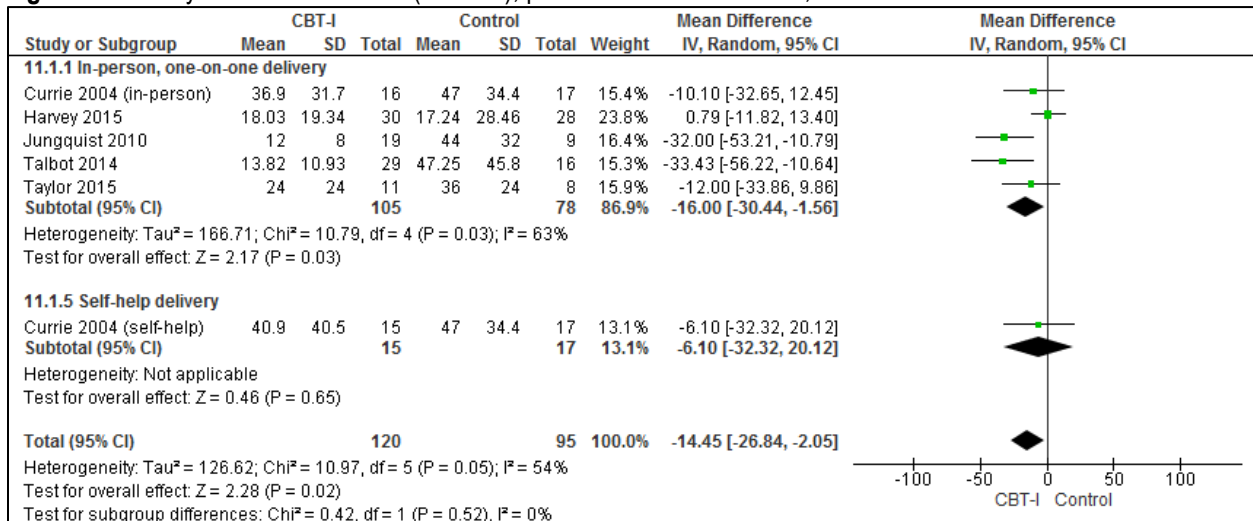



Wake after sleep onset: Insomnia and comorbid medical conditions

Figure S18. Diary-determined WASO (minutes), post treatment differences, CBT-I vs. control

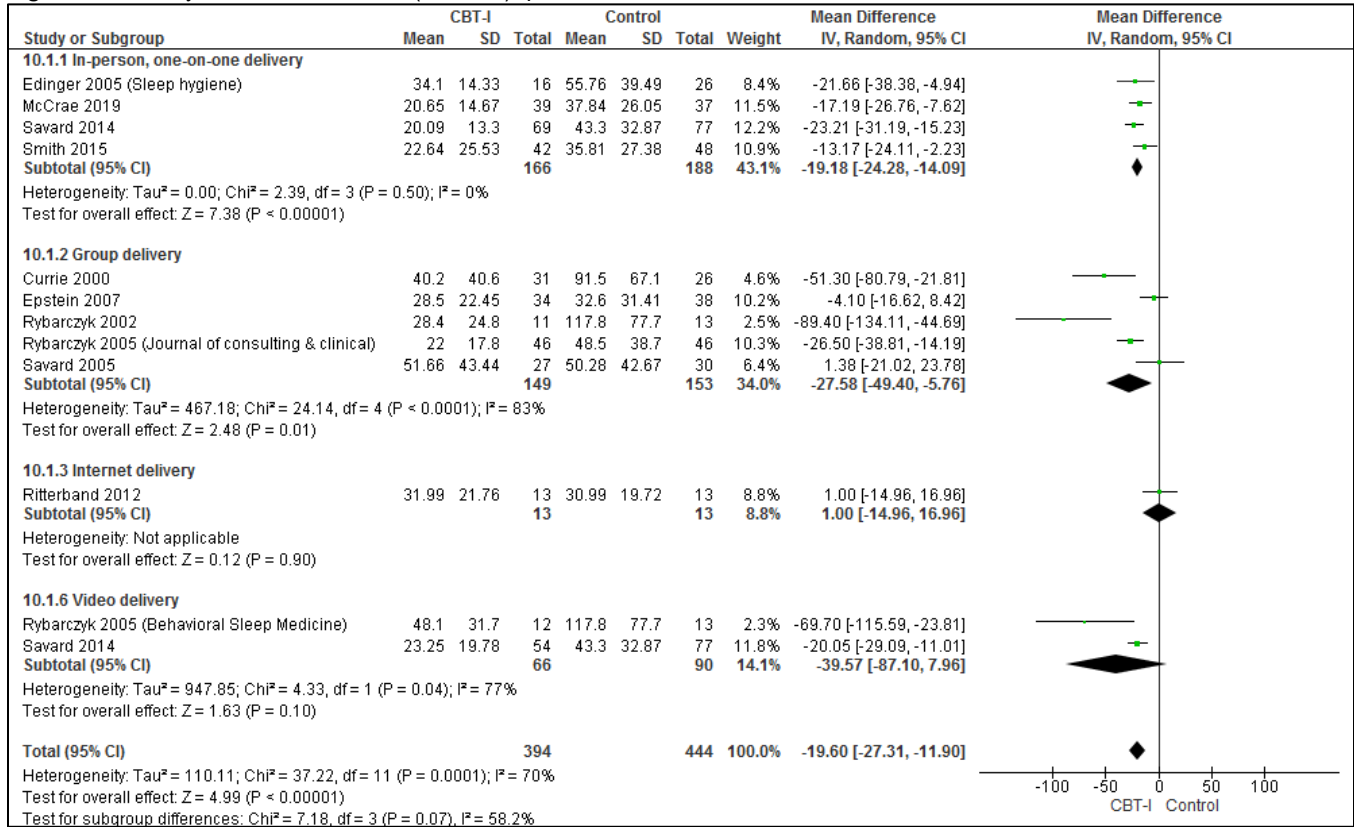

\*Edinger 2005 (in-person and self) pooled control data

Wake after sleep onset (Act)

Figure S19. Actigraphy-determined WASO (minutes), post treatment differences, CBT-I vs. control

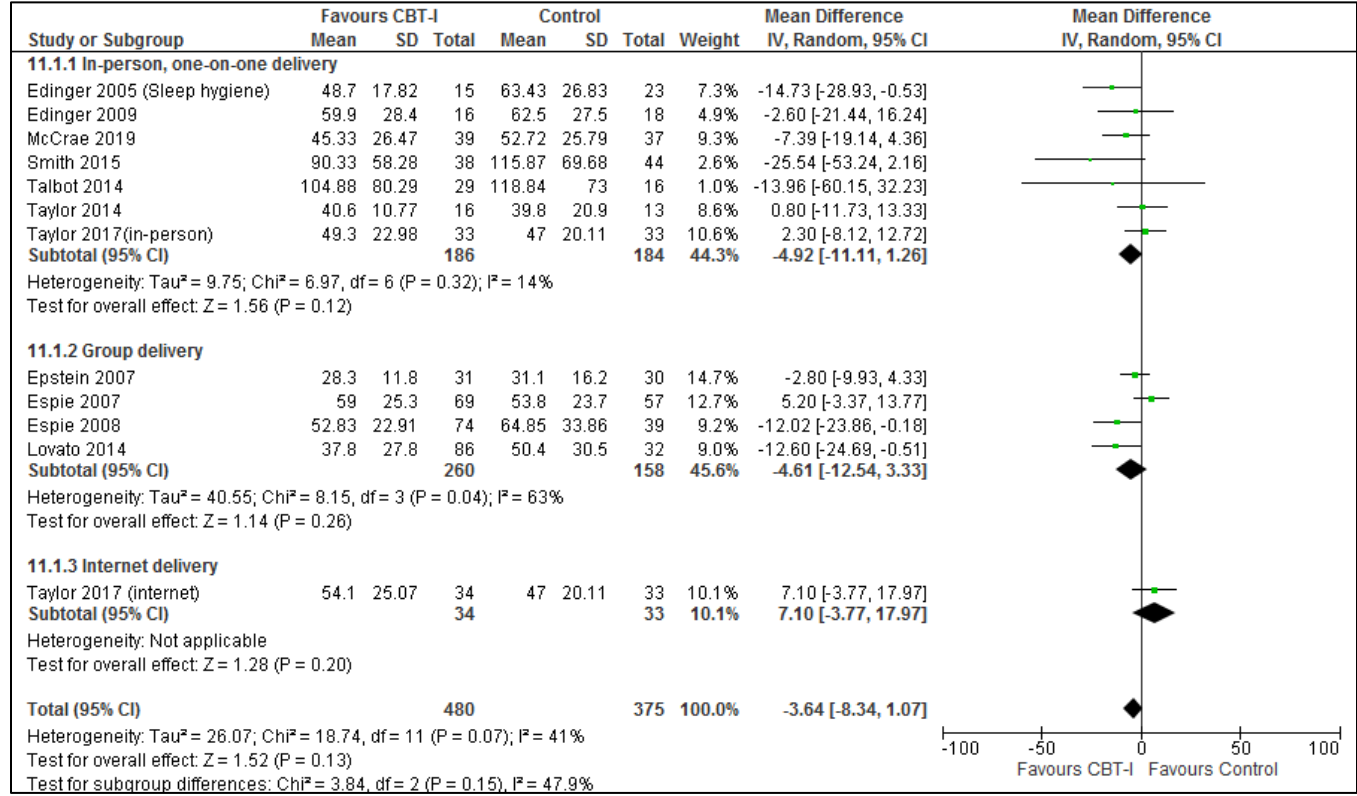

\*Edinger 2005 (in-person and self) pooled control data  
Taylor 2017 (in-person and internet) uses same control data, converted SE to SD

Wake after sleep onset (Act): Insomnia and no comorbidities

Figure S20. Actigraphy-determined WASO (minutes), post treatment differences, CBT-I vs. control

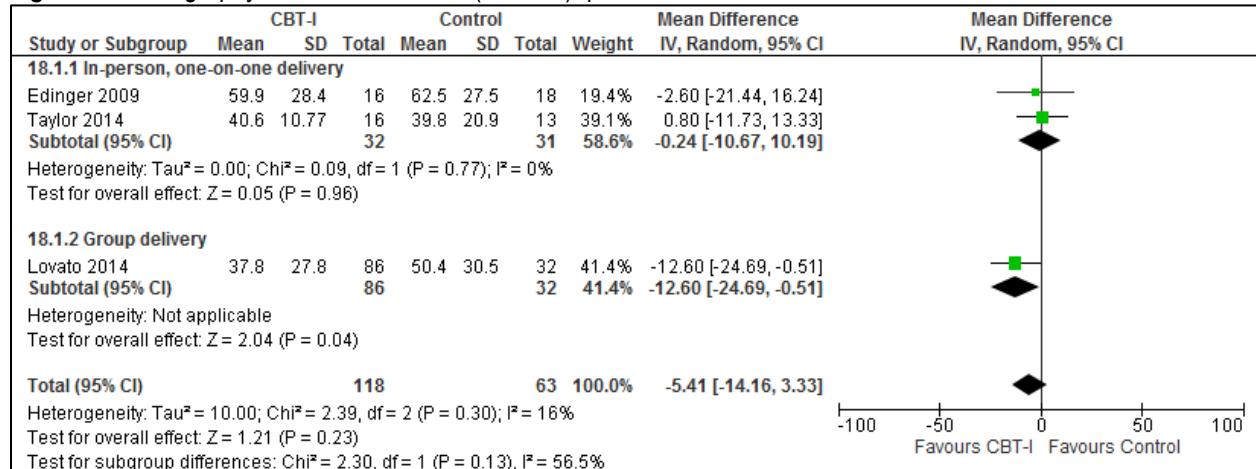

Wake after sleep onset (Act): Insomnia and comorbid psychiatric conditions

**Table S5.** Actigraphy-determined WASO (minutes), post treatment differences, CBT-I vs. control

| Study       | Delivery method                | CBT-I  |       |       | Control |    |       | Mean Difference, [95% CI] |
|-------------|--------------------------------|--------|-------|-------|---------|----|-------|---------------------------|
|             |                                | Mean   | SD    | Total | Mean    | SD | Total |                           |
| Talbot 2014 | In-person, one-on-one delivery | 104.88 | 80.29 | 29    | 118.84  | 73 | 16    | -13.96[-60.15, 32.23]     |

Wake after sleep onset (Act): Insomnia and comorbid medical conditions

**Figure S21.** Actigraphy-determined WASO (minutes), post treatment differences, CBT-I vs. control

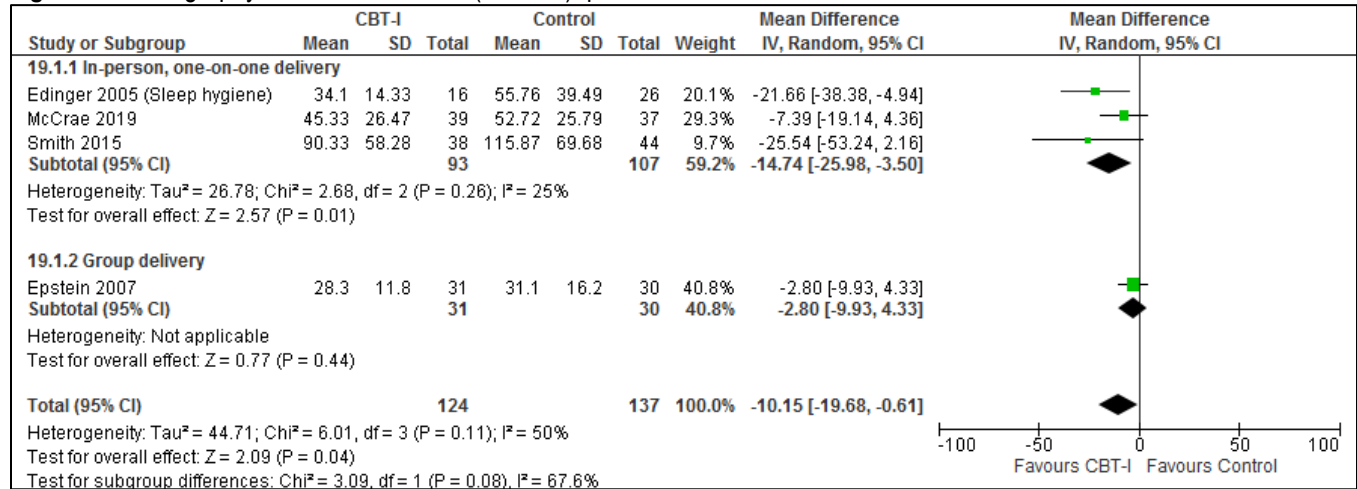

\*Edinger 2005 (in-person and self) pooled control data

Wake after sleep onset (PSG)

**Figure S22.** PSG-determined WASO (minutes), post treatment differences, CBT-I vs. control

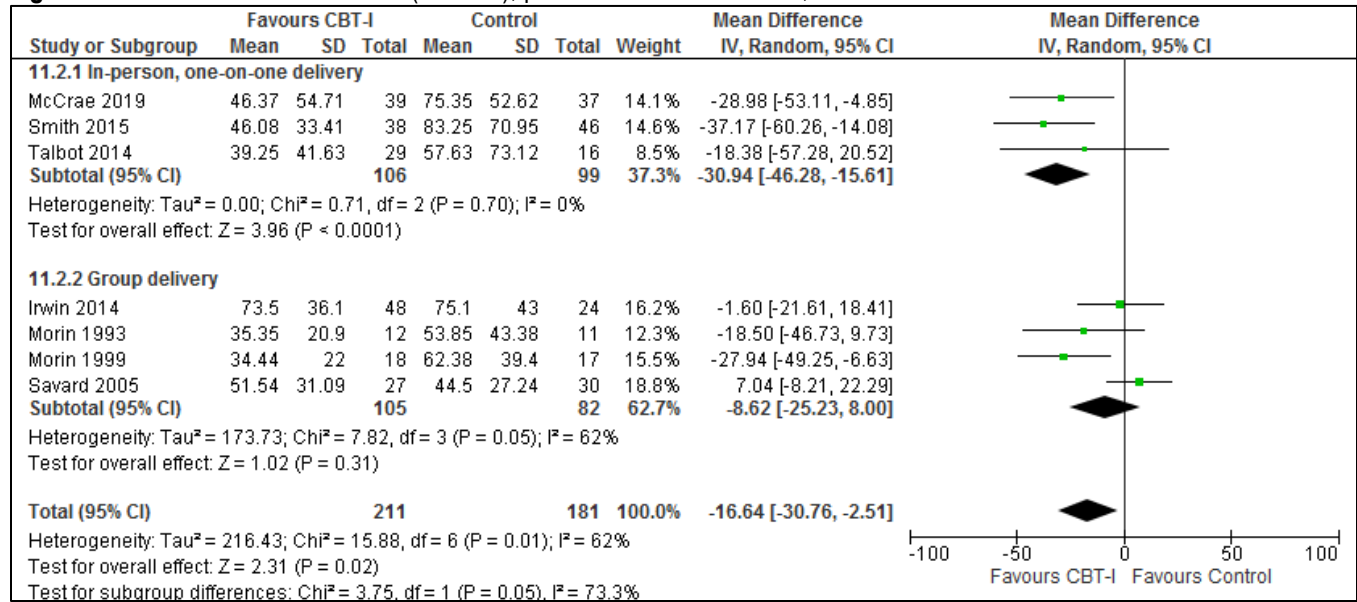

Wake after sleep onset (PSG): Insomnia and no comorbidities

**Table S6.** PSG-determined WASO (minutes), post treatment differences, CBT-I vs. control

| Study      | Delivery method | CBT-I |      |       | Control |       |       | Mean Difference, [95% CI] |
|------------|-----------------|-------|------|-------|---------|-------|-------|---------------------------|
|            |                 | Mean  | SD   | Total | Mean    | SD    | Total |                           |
| Morin 1993 | Group delivery  | 35.35 | 20.9 | 12    | 53.85   | 43.38 | 11    | -18.50[-46.73, 9.73]      |
| Morin 1999 | Group delivery  | 34.44 | 22   | 18    | 62.38   | 39.4  | 17    | -27.94[-49.25, -6.63]     |

Wake after sleep onset (PSG): Insomnia and comorbid psychiatric conditions

**Table S7.** PSG-determined WASO (minutes), post treatment differences, CBT-I vs. control

| Study       | Delivery method                | CBT-I |       |       | Control |       |       | Mean Difference, [95% CI] |
|-------------|--------------------------------|-------|-------|-------|---------|-------|-------|---------------------------|
|             |                                | Mean  | SD    | Total | Mean    | SD    | Total |                           |
| Talbot 2014 | In-person, one-on-one delivery | 39.25 | 41.63 | 29    | 57.63   | 73.12 | 16    | -18.38[-57.28, 20.52]     |

Wake after sleep onset (PSG): Insomnia and comorbid medical conditions

**Figure S23.** PSG-determined WASO (minutes), post treatment differences, CBT-I vs. control

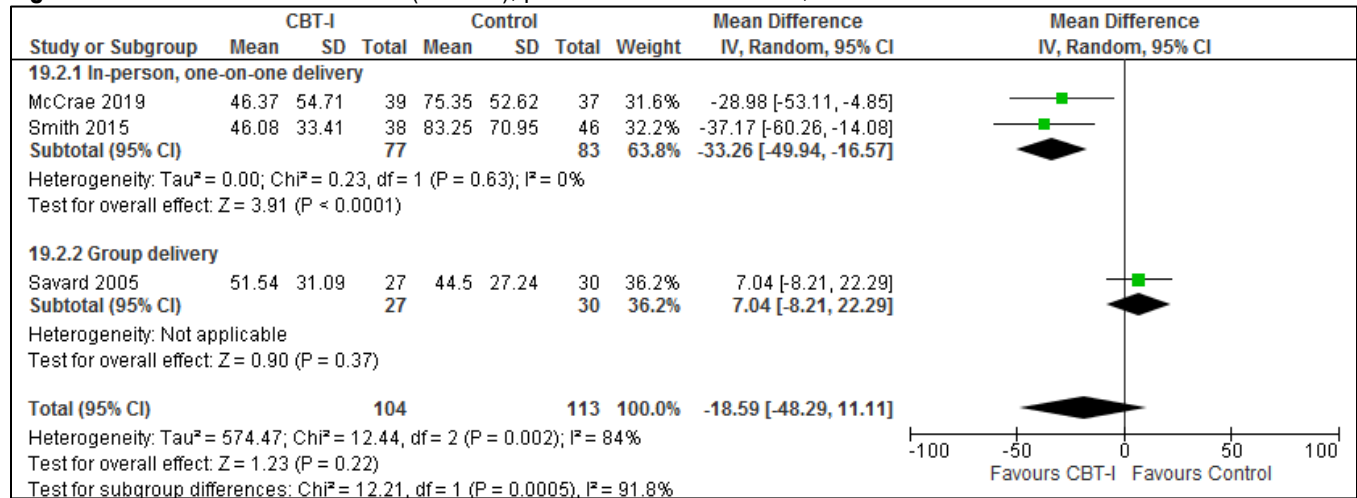

## Wake after sleep onset (Diary): In-person delivery vs. comparison

**Figure S24.** Diary-determined WASO (minutes), post treatment differences for in-person delivery

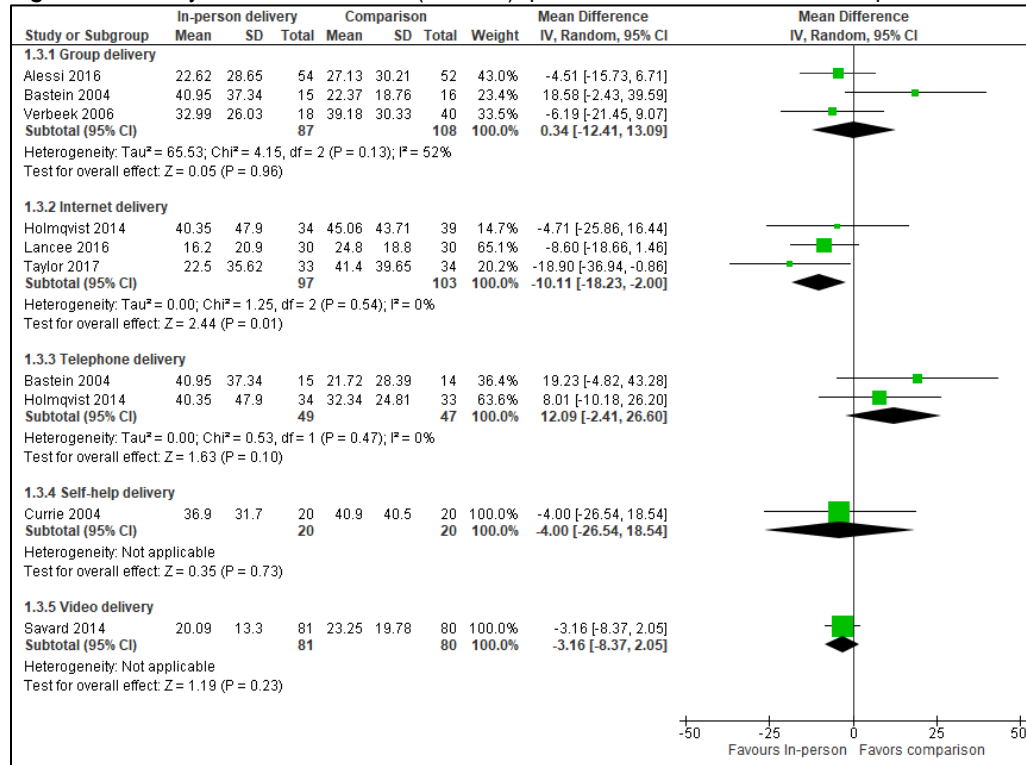

\* each subgroup of delivery method is reported separately in the results section

## Wake after sleep onset (Act): In-person delivery vs. comparison

**Table S8.** Actigraphy-determined WASO (minutes), post treatment differences for in-person delivery

| Study         | In-person CBT-I |       |       | Group delivery CBT-I |      |       | Mean Difference, [95% CI] |
|---------------|-----------------|-------|-------|----------------------|------|-------|---------------------------|
|               | Mean            | SD    | Total | Mean                 | SD   | Total |                           |
| Yamadera 2013 | 15.8            | 11.18 | 20    | 12.5                 | 10.5 | 25    | 3.30[-3.10, 9.70]         |

**Table S9.** Actigraphy-determined WASO (minutes), post treatment differences for in-person delivery

| Study       | In-person CBT-I |      |       | Internet delivery CBT-I |       |       | Mean Difference, [95% CI] |
|-------------|-----------------|------|-------|-------------------------|-------|-------|---------------------------|
|             | Mean            | SD   | Total | Mean                    | SD    | Total |                           |
| Taylor 2017 | 49.3            | 22.8 | 33    | 54.1                    | 25.07 | 34    | -4.80 [-16.27, 6.67]      |

# Remission rates

**Figure S25.** ISI/Diary-determined remission rate, post treatment differences, CBT-I vs. control

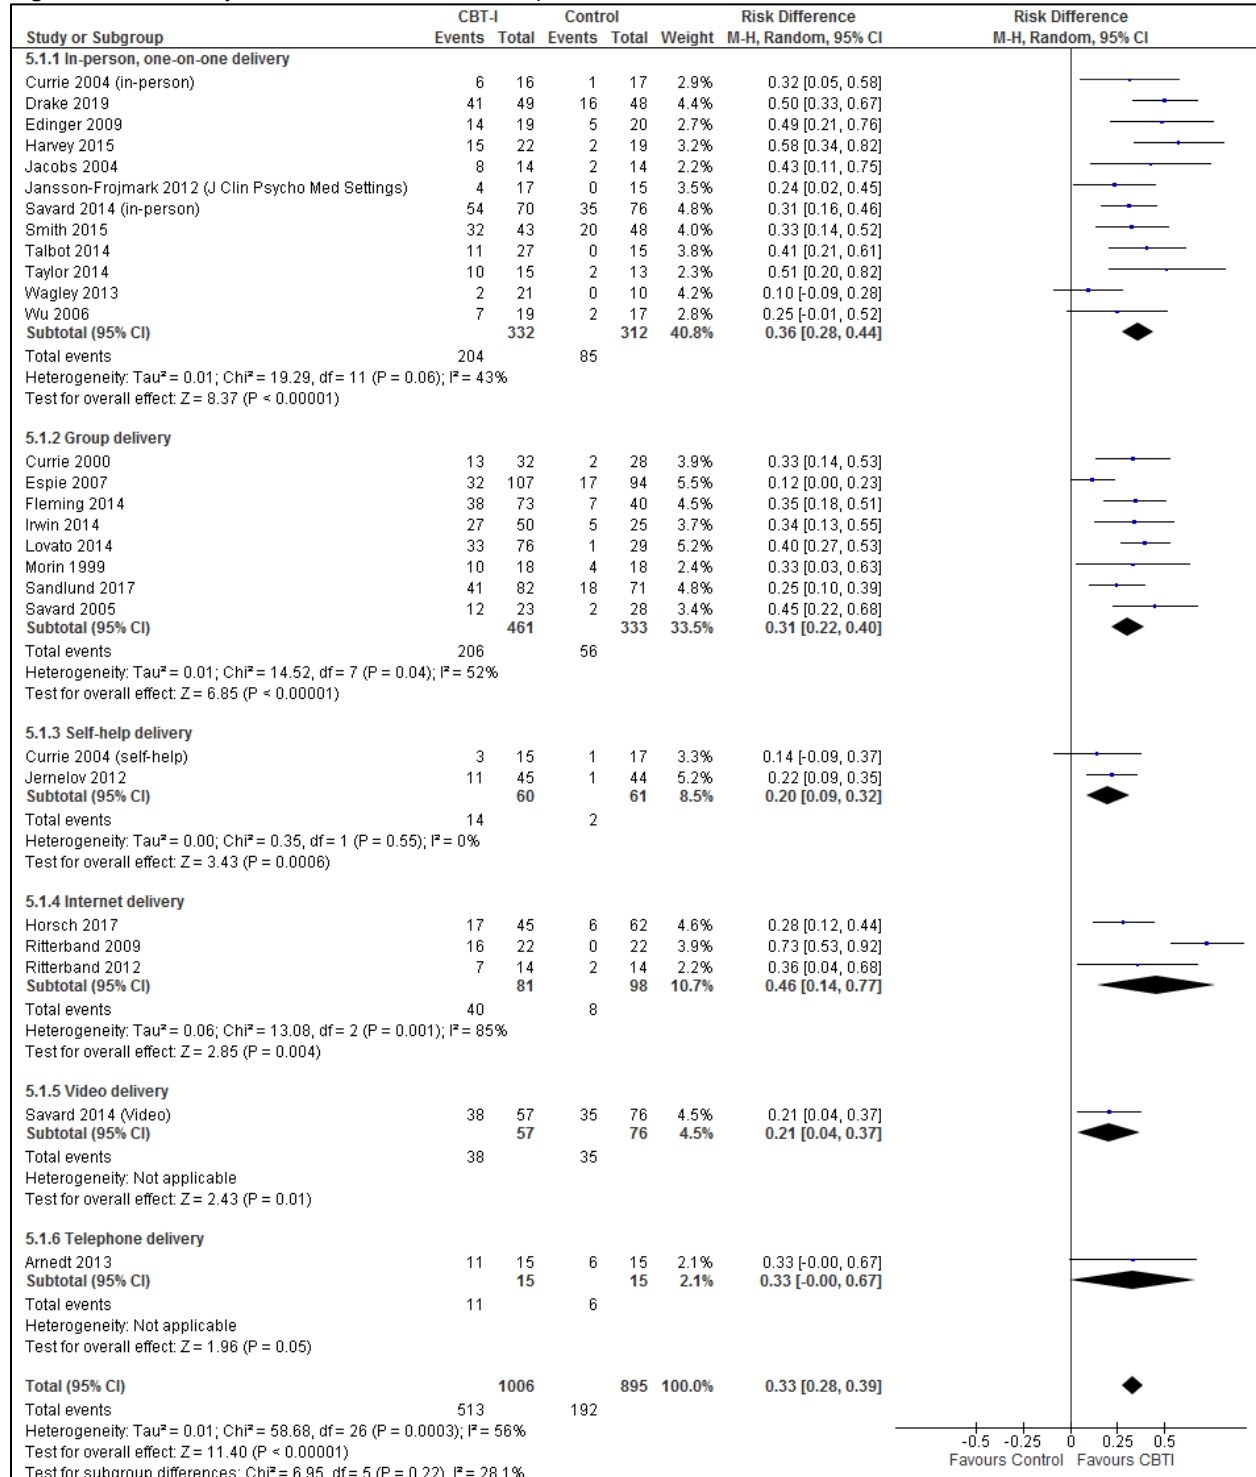

\*Currie 2004 (in-person and self) uses same control data  
 Savard 2014 (in-person and video) uses same control data

Remission rate: Insomnia and no comorbidities

Figure S26. Remission rate, post treatment differences, CBT-I vs. control

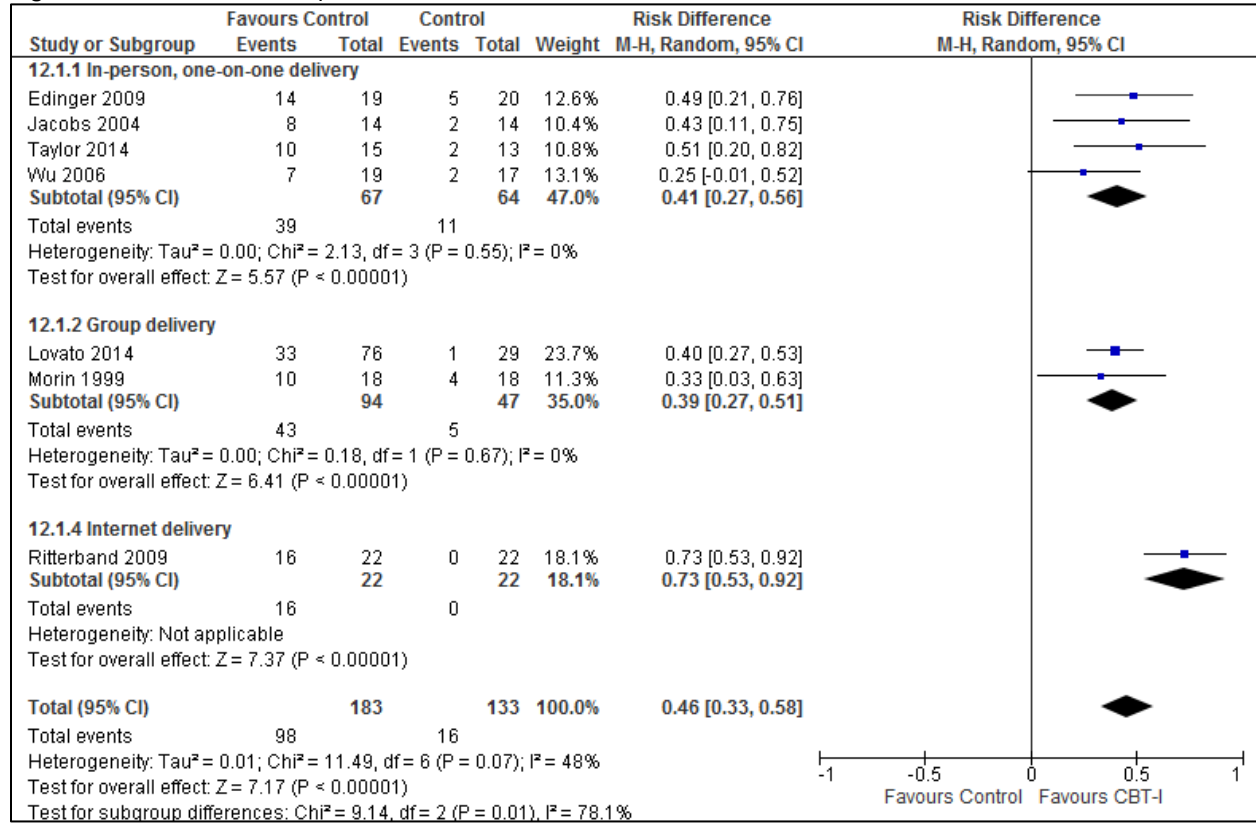

Remission rate: Insomnia and comorbid psychiatric conditions

Figure S27. Remission rate, post treatment differences, CBT-I vs. control

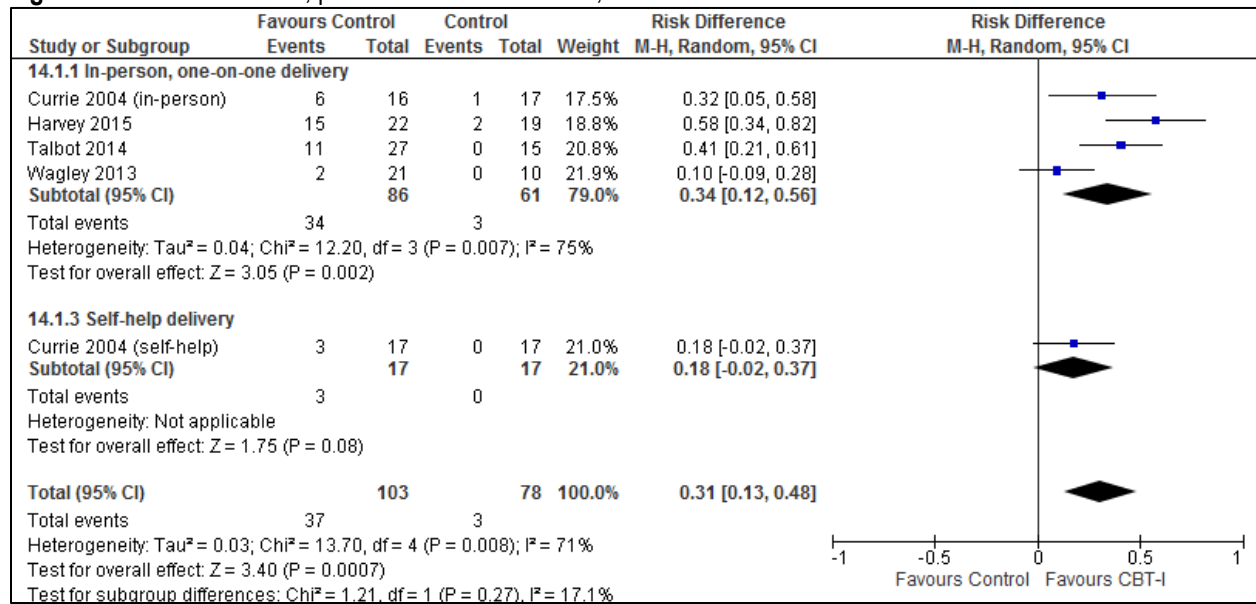

Remission rate: Insomnia and comorbid medical conditions

Figure S28. Remission rate, post treatment differences, CBT-I vs. control

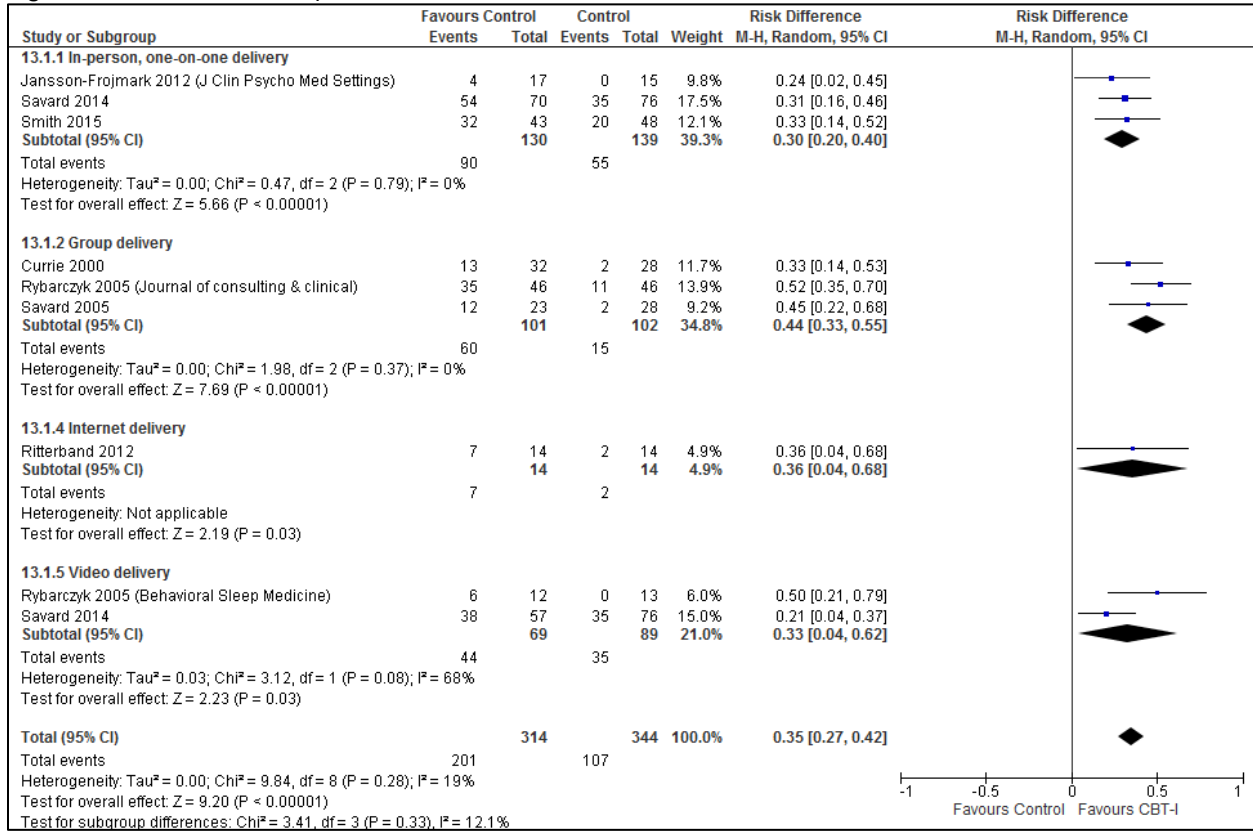

Remission rate: In-person delivery vs. comparison

Figure S29. Diary/ISI-determined remission rate, post treatment differences for in-person delivery

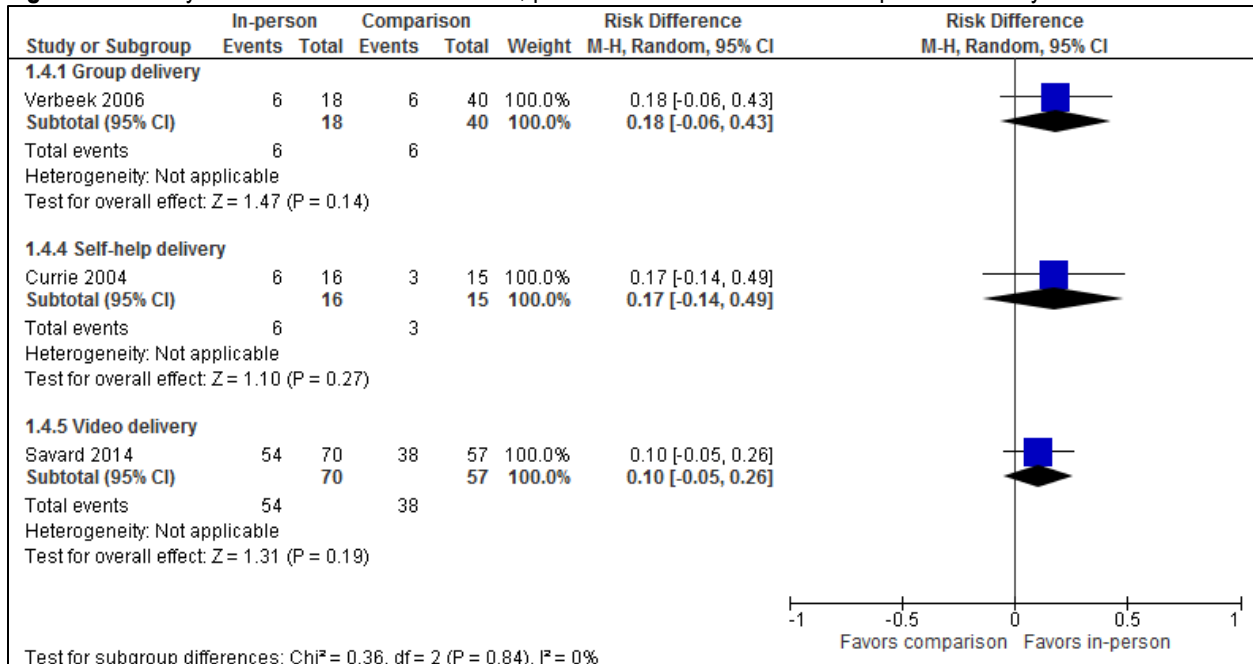

\* each subgroup of delivery method is reported separately in the results section



## Responder rates

**Figure S30.** ISI/Diary-determined responder rate, post treatment differences, CBT-I vs. control

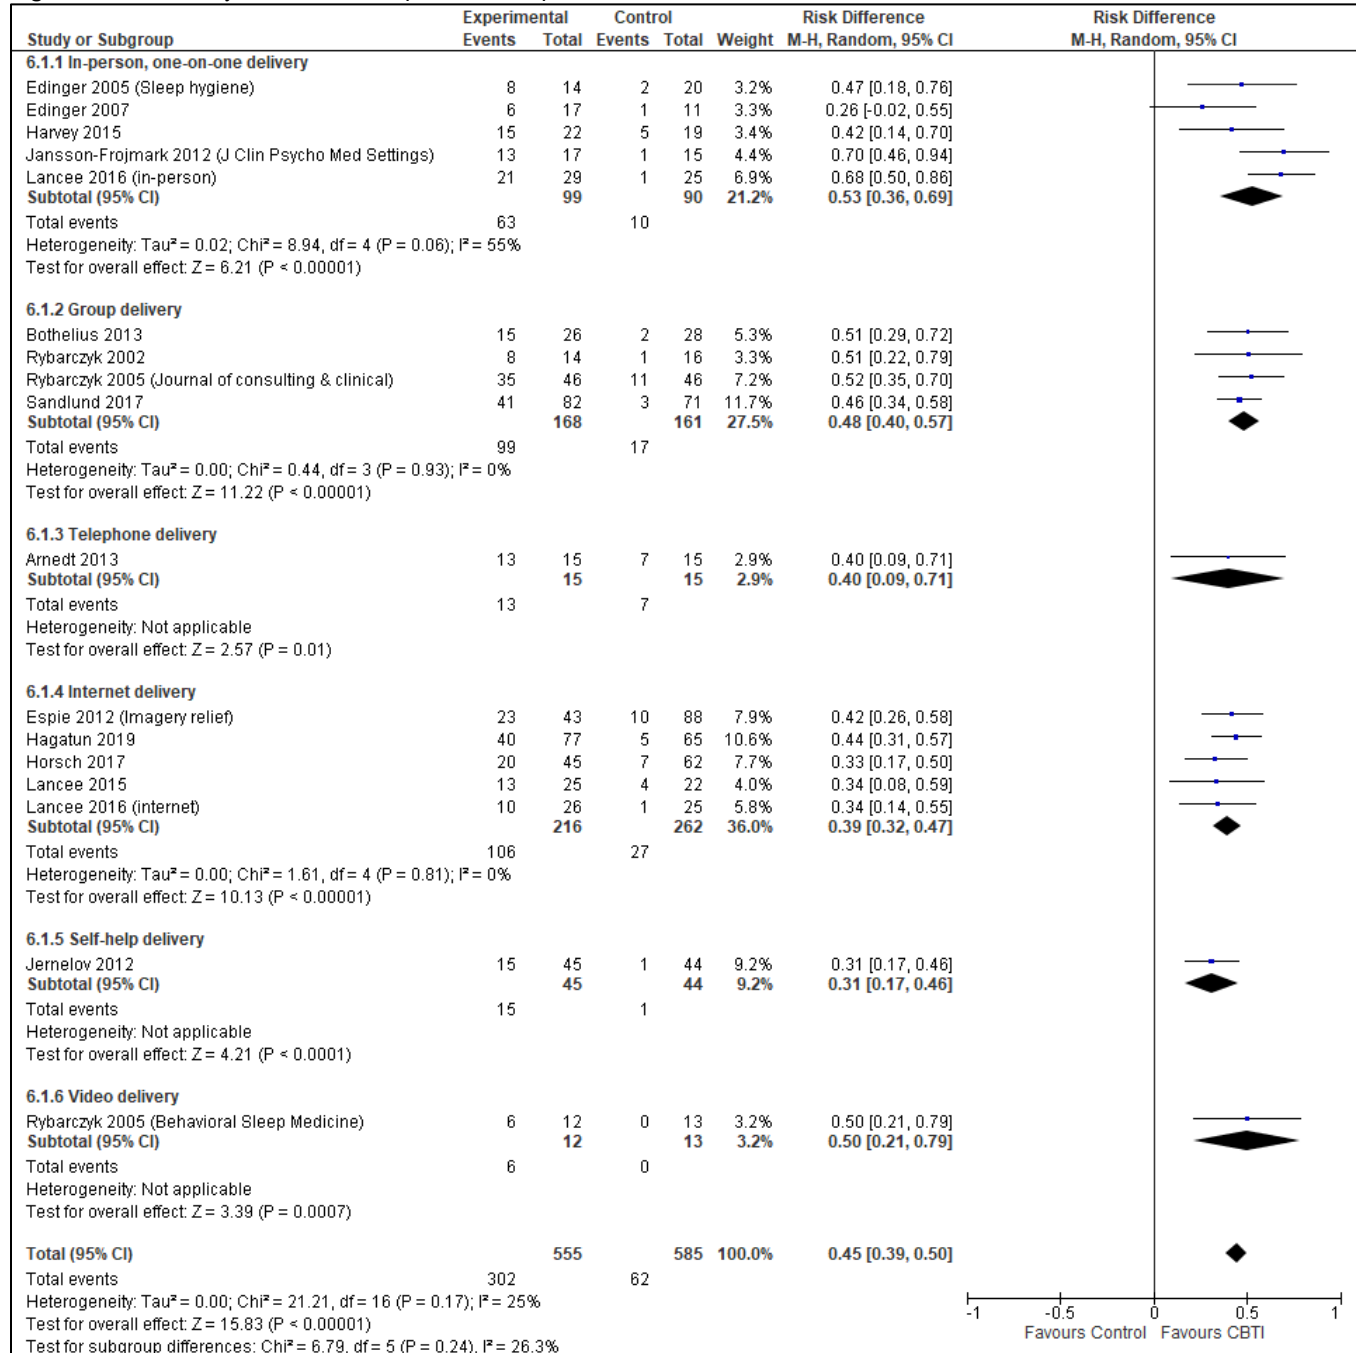

\*Espie 2012 (imagery and usual care) pooled control data

Lancee 2016 (in-person and internet) uses same control data

Edinger 2005 (usual care and sleep hygiene) pooled control data

Responder rate: Insomnia and no comorbidities

**Table S10.** Responder rate, post treatment differences, CBT-I vs. control

| Study        | Delivery method    | CBT-I  |       | Control |       | Risk Difference [95% CI] |
|--------------|--------------------|--------|-------|---------|-------|--------------------------|
|              |                    | Events | Total | Events  | Total |                          |
| Edinger 2007 | In-person delivery | 6      | 17    | 1       | 11    | 0.26[-0.02, 0.55]        |
| Hagatun 2019 | Internet delivery  | 40     | 77    | 5       | 65    | 0.44[0.31, 0.57]         |

Responder rate: Comorbid insomnia to psychiatric conditions

**Figure S31.** Responder rate, post treatment differences, CBT-I vs. control

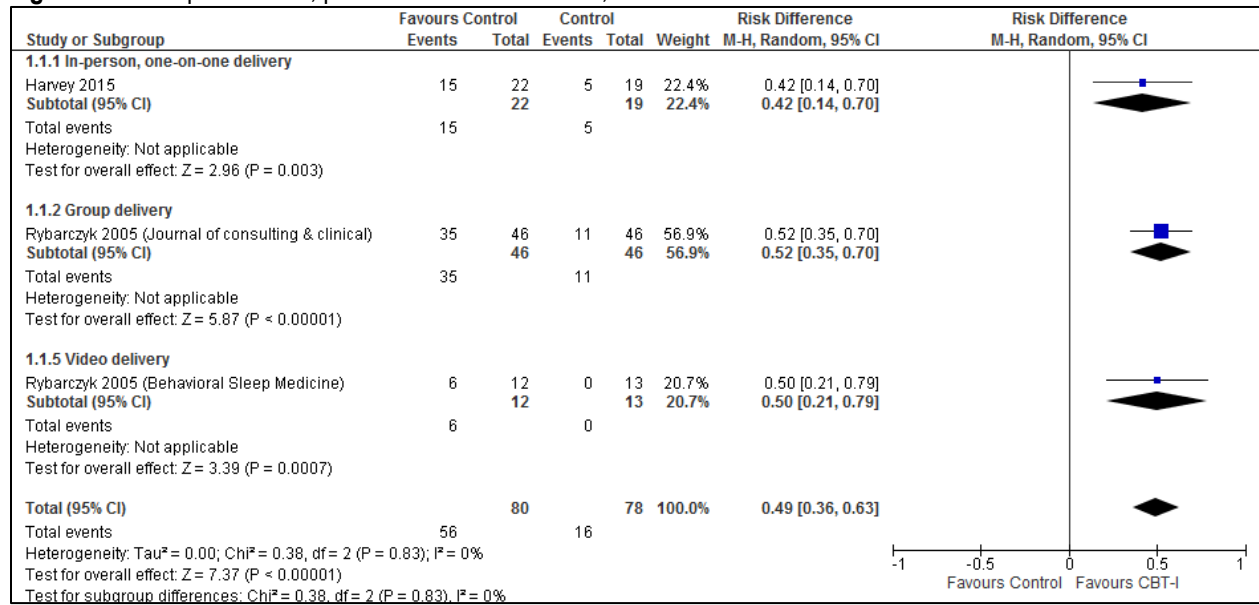

Responder rate: Comorbid insomnia to medical conditions

**Figure S32.** Responder rate, post treatment differences, CBT-I vs. control

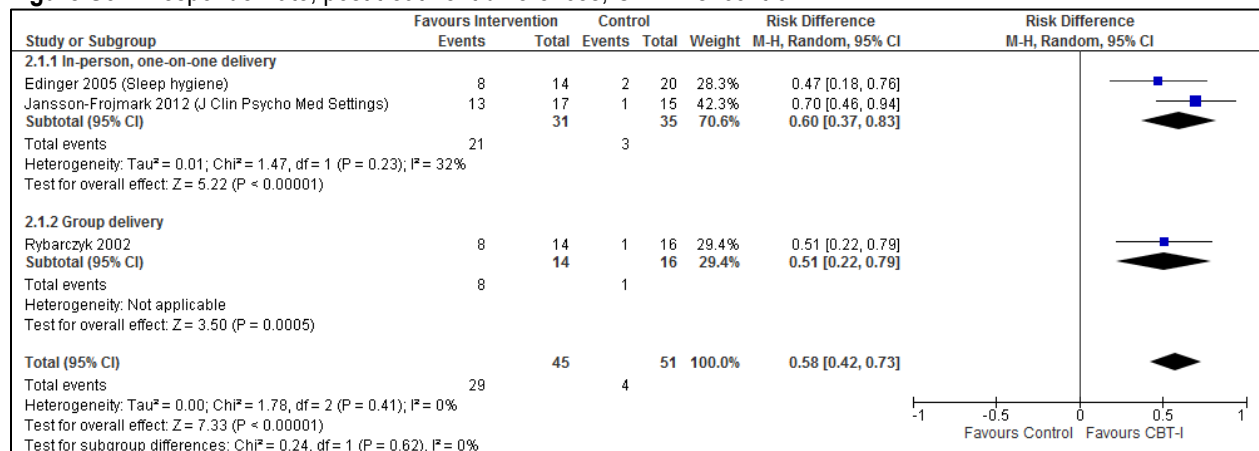

Edinger 2005 (usual care and sleep hygiene) pooled control data

## Responder rate: In-person delivery vs. comparison

**Table S11.** ISI -determined remission rate, post treatment differences for in-person delivery

| Study       | CBT-I In-person delivery |       | CBT-I Internet delivery |       | Risk Difference [95% CI] |
|-------------|--------------------------|-------|-------------------------|-------|--------------------------|
|             | Events                   | Total | Events                  | Total |                          |
| Lancee 2016 | 21                       | 30    | 10                      | 27    | 0.33[0.08, 0.57]         |

## Beliefs and attitudes about sleep

**Figure S33.** Dysfunctional Beliefs and Attitudes about Sleep (DBAS)-determined beliefs and attitudes about sleep, post treatment differences, CBT-I vs. control

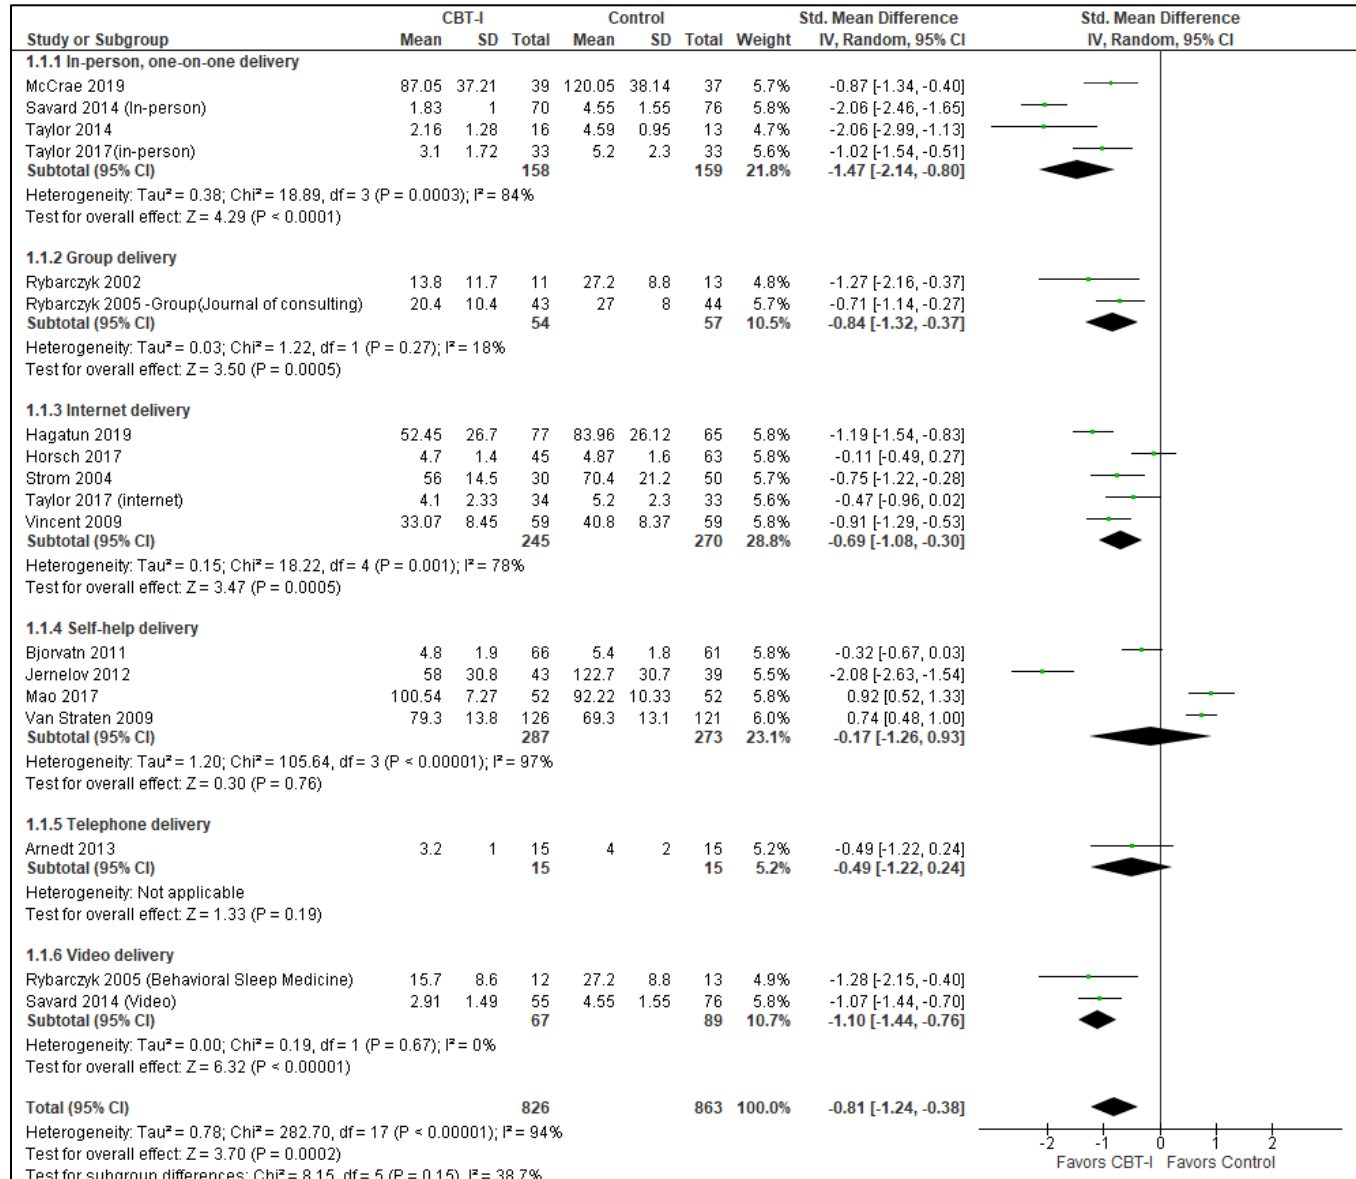

\*Savard 2014 (in-person and video) uses same control data

\*Taylor 2017 (in-person and internet) uses same control data

Beliefs and attitudes about sleep: Insomnia and no comorbidities

**Figure S34.** Dysfunctional Beliefs and Attitudes about Sleep (DBAS)-determined beliefs and attitudes about sleep, post treatment differences, CBT-I vs. control

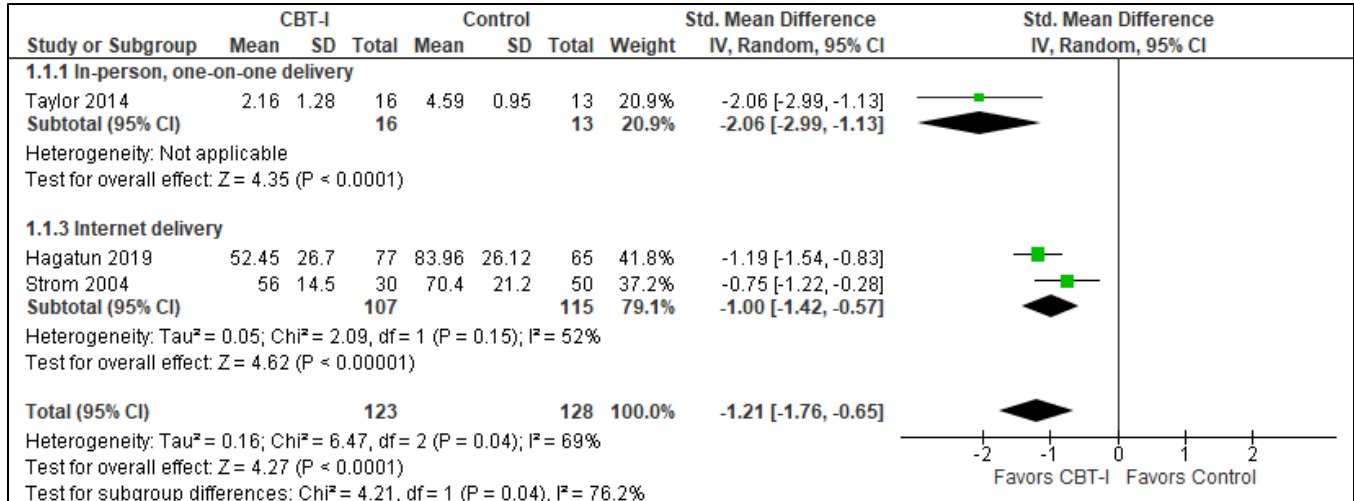

Beliefs and attitudes about sleep: Insomnia and comorbid medical conditions

**Figure S35.** Dysfunctional Beliefs and Attitudes about Sleep (DBAS)-determined beliefs and attitudes about sleep, post treatment differences, CBT-I vs. control

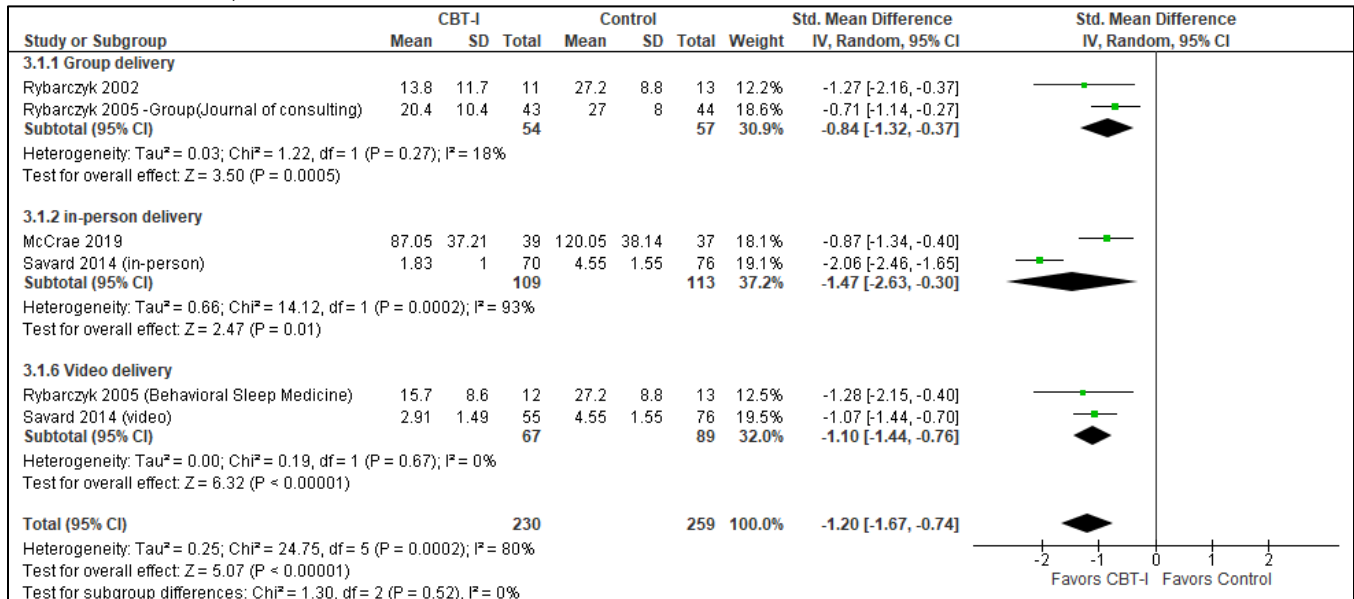

## Beliefs and attitudes about sleep: In-person delivery vs. comparison

**Figure S36.** Dysfunctional Beliefs and Attitudes about Sleep (DBAS)-determined beliefs and attitudes about sleep, post treatment differences for in-person delivery

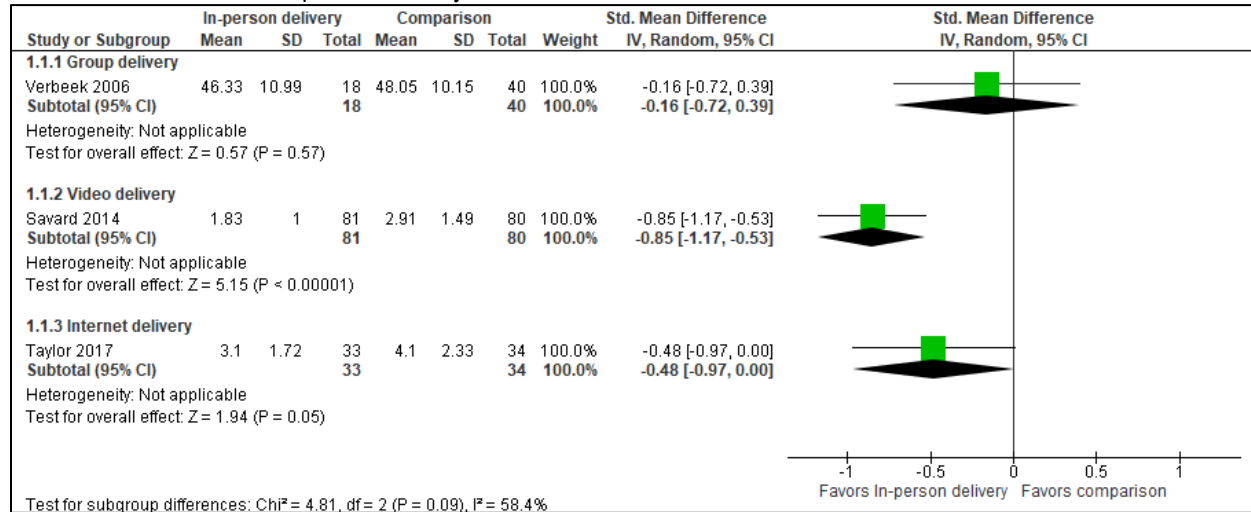

\* each subgroup of delivery method is reported separately in the results section

## Daytime fatigue

**Figure S37.** Fatigue tools-determined daytime fatigue, post treatment differences, CBT-I vs. control

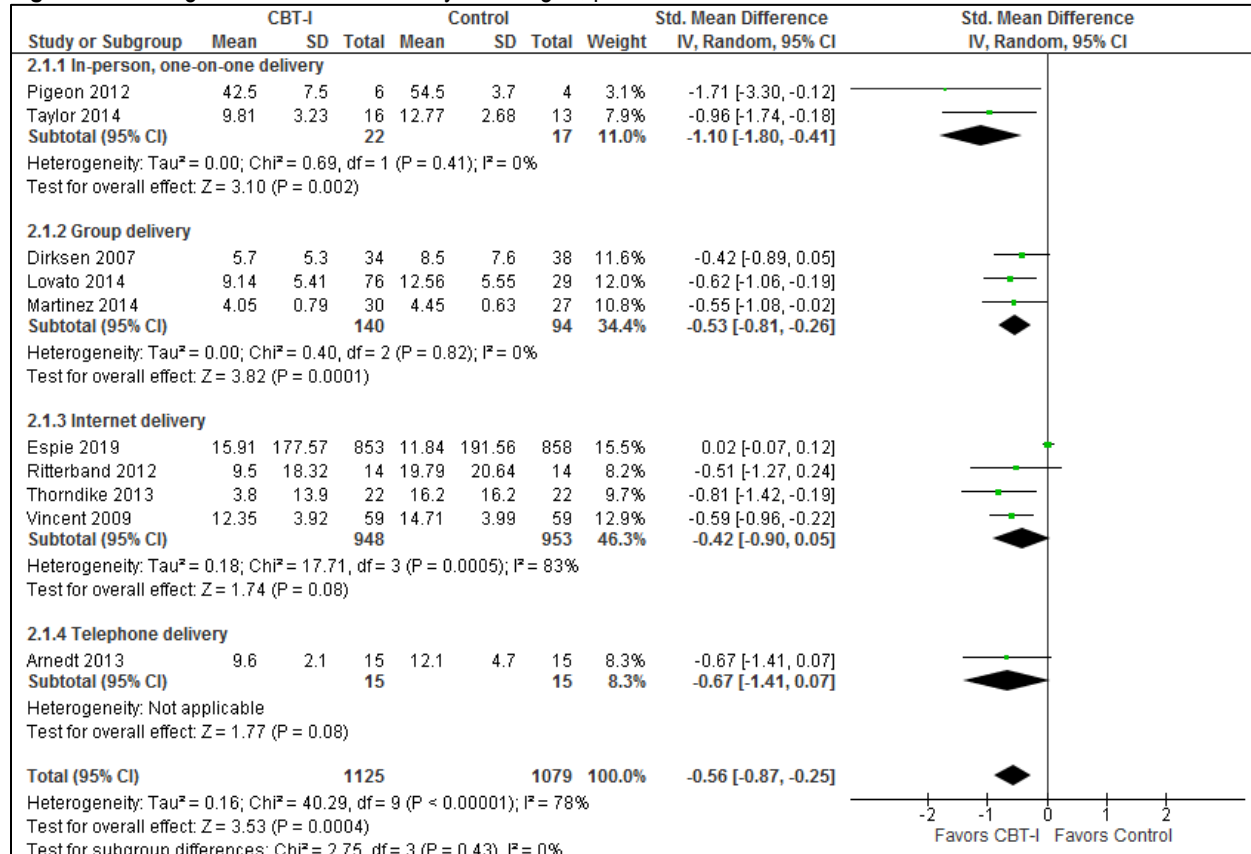

\*Espie 2019 converted SE to SD

\*Vincent 2009 converted SE to SD

Daytime fatigue: Insomnia and no comorbidities

**Table S12.** Fatigue tools-determined daytime fatigue, post treatment differences, CBT-I vs. control

| Study       | Delivery method    | CBT-I |      |       | Control |      |       | Std. Mean Difference, [95% CI] |
|-------------|--------------------|-------|------|-------|---------|------|-------|--------------------------------|
|             |                    | Mean  | SD   | Total | Mean    | SD   | Total |                                |
| Taylor 2014 | In-person delivery | 9.81  | 3.23 | 16    | 12.77   | 2.68 | 13    | -0.96[-1.74, -0.18]            |
| Lovato 2014 | Group delivery     | 9.14  | 5.41 | 76    | 12.56   | 5.55 | 29    | -0.62[-1.06, -0.19]            |

Daytime fatigue: Insomnia and comorbid psychiatric conditions

**Table S13.** Fatigue tools-determined daytime fatigue, post treatment differences, CBT-I vs. control

| Study         | Delivery method   | CBT-I |      |       | Control |       |       | Std. Mean Difference, [95% CI] |
|---------------|-------------------|-------|------|-------|---------|-------|-------|--------------------------------|
|               |                   | Mean  | SD   | Total | Mean    | SD    | Total |                                |
| Thorndike2013 | Internet delivery | 3.8   | 13.9 | 22    | 16.18   | 16.16 | 22    | -0.81[-1.42, -0.19]            |

Daytime fatigue: Insomnia and comorbid medical conditions

**Figure S38.** Fatigue tools-determined daytime fatigue, post treatment differences, CBT-I vs. control

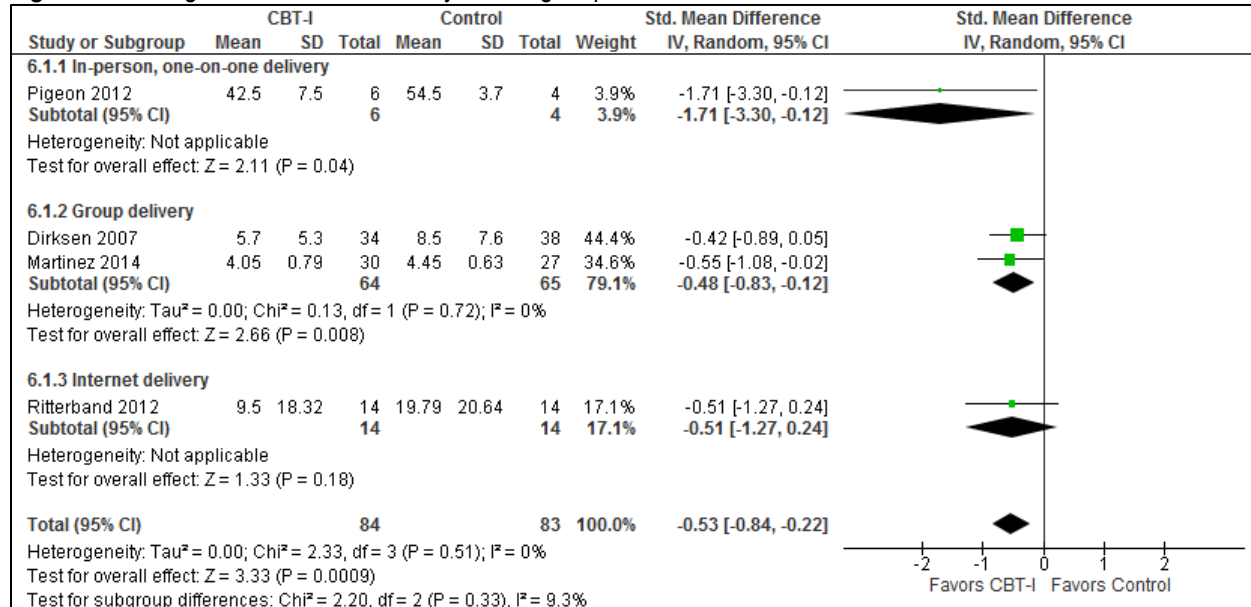

Daytime fatigue: In-person delivery vs. comparison:

**Table S14.** Diary-determined quality of sleep, post treatment differences for in-person delivery

| Study          | CBT-I In-person delivery |      |       | CBT-I Internet |      |       | Std. Mean Difference, [95% CI] |
|----------------|--------------------------|------|-------|----------------|------|-------|--------------------------------|
|                | Mean                     | SD   | Total | Mean           | SD   | Total |                                |
| Holmqvist 2014 | 12.65                    | 4.72 | 32    | 13.53          | 5.24 | 38    | -0.17[-0.64, 0.30]             |

| Study          | CBT-I In-person delivery |      |       | CBT-I Telehealth delivery |      |       | Std. Mean Difference, [95% CI] |
|----------------|--------------------------|------|-------|---------------------------|------|-------|--------------------------------|
|                | Mean                     | SD   | Total | Mean                      | SD   | Total |                                |
| Holmqvist 2014 | 12.65                    | 4.72 | 32    | 12.5                      | 4.75 | 32    | 0.03[-0.46, 0.52]              |

# Insomnia severity

**Figure S39.** ISI-determined insomnia severity, post treatment differences, CBT-I vs. control

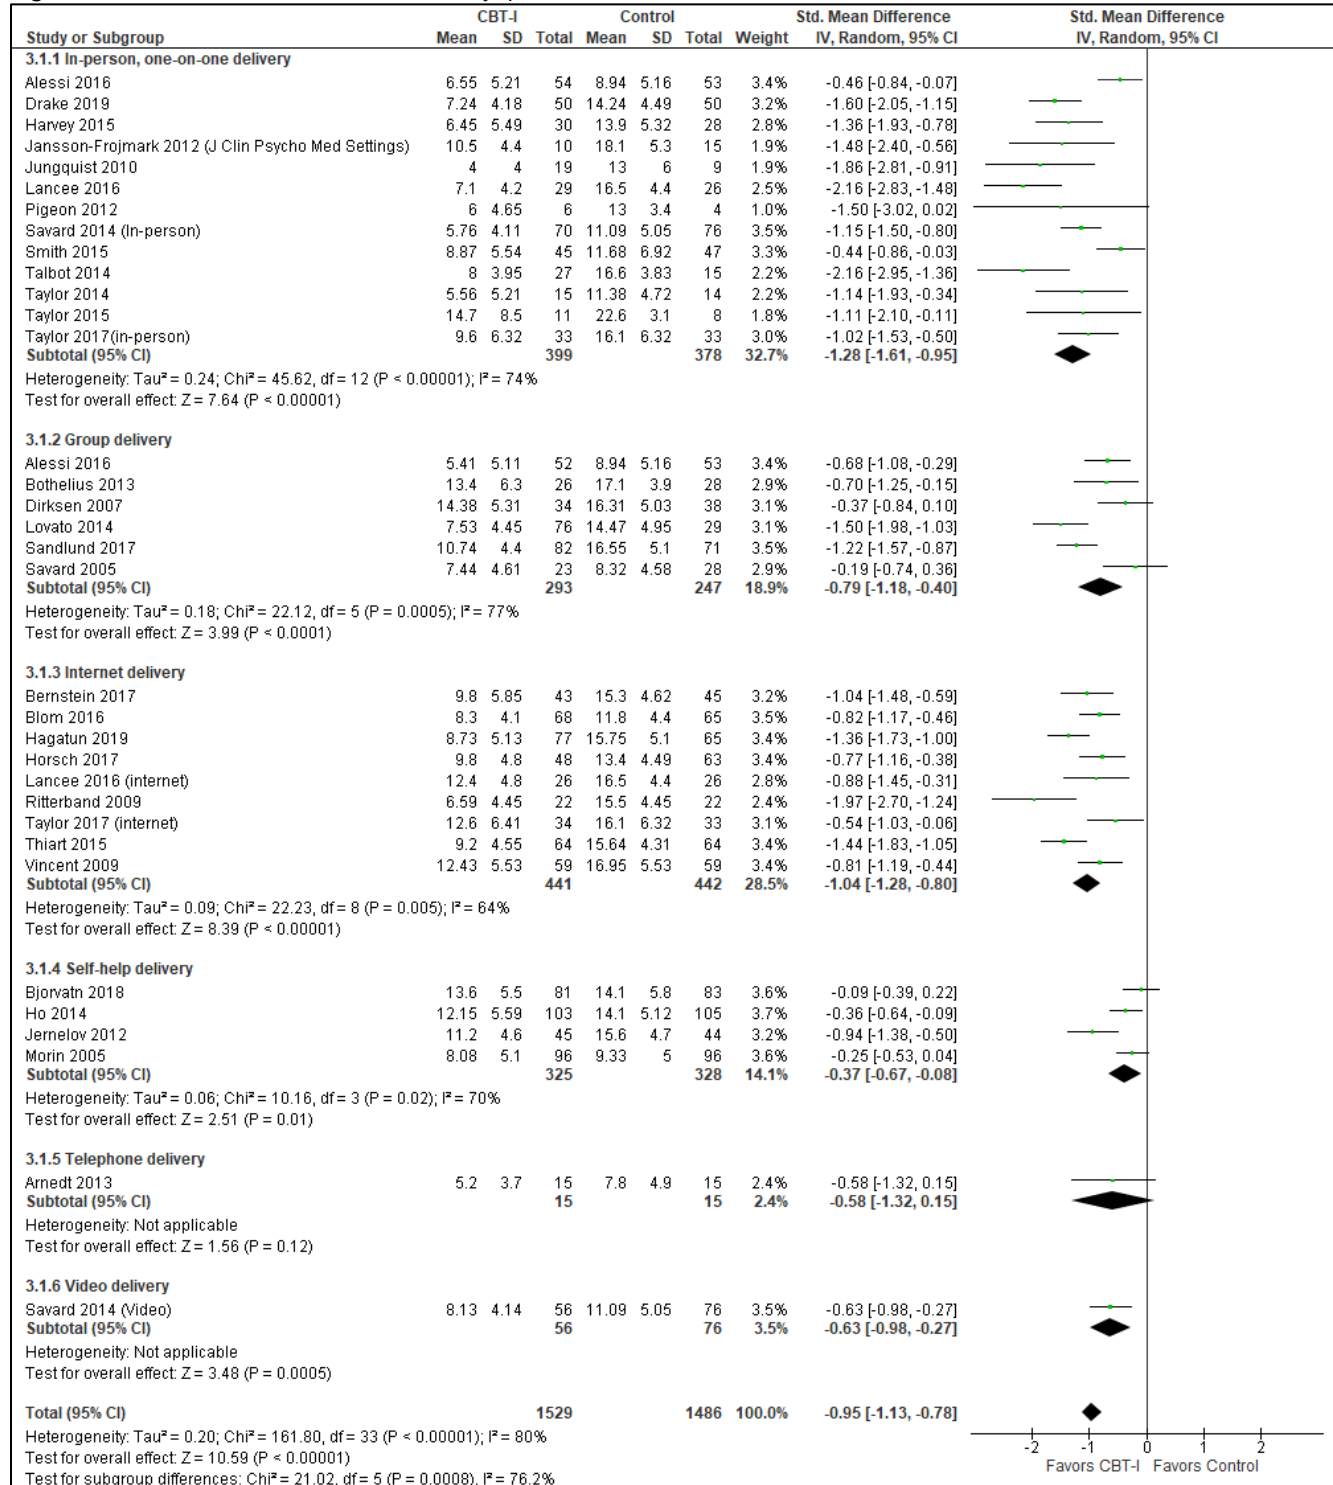

\*Lancee 2016 (in-person and internet) uses same control data

\*Savard 2014 (in-person and video) uses same control data

\*Taylor 2017 (in-person and internet) uses same control data

\*Bernstein 2017 SD calculated from CI

\*Morin 2005 SD calculated from CI

\*Alessi 2016 (in-person and group use same control data) SD calculated from SE

\*Ritterband 2009 SD calculated from CI

Insomnia severity: Insomnia and no comorbidities

Figure S40. ISI-determined insomnia severity, post treatment differences, CBT-I vs. control

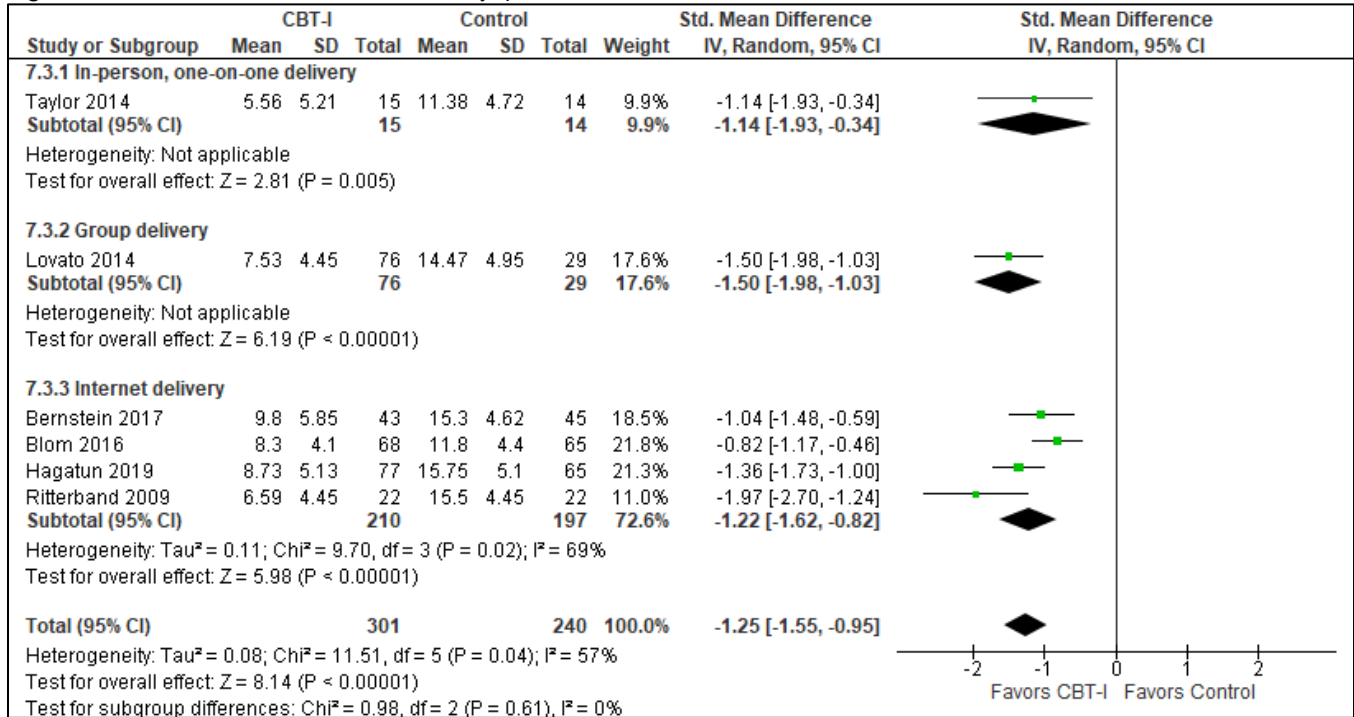

Insomnia severity: Insomnia and comorbid psychiatric conditions

Figure S41. ISI-determined insomnia severity, post treatment differences, CBT-I vs. control

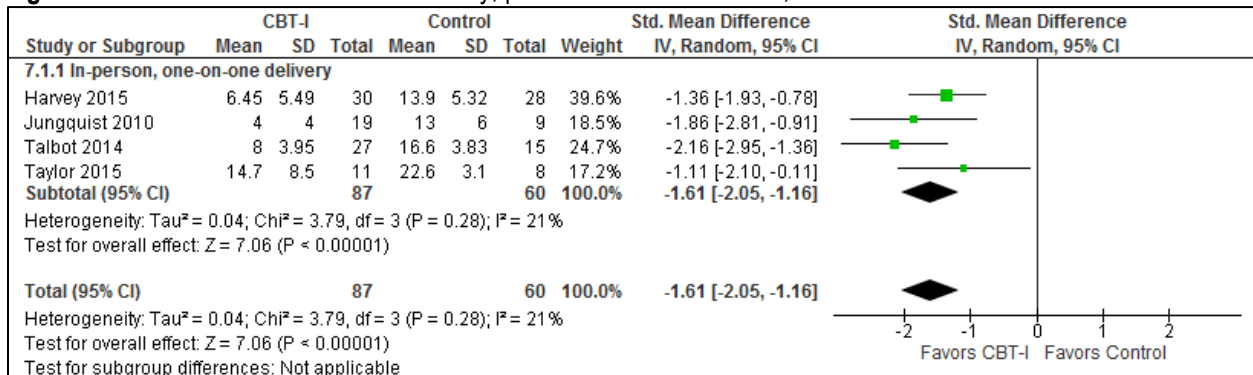



Insomnia severity: Insomnia and comorbid medical conditions

Figure S42. ISI-determined insomnia severity, post treatment differences, CBT-I vs. control

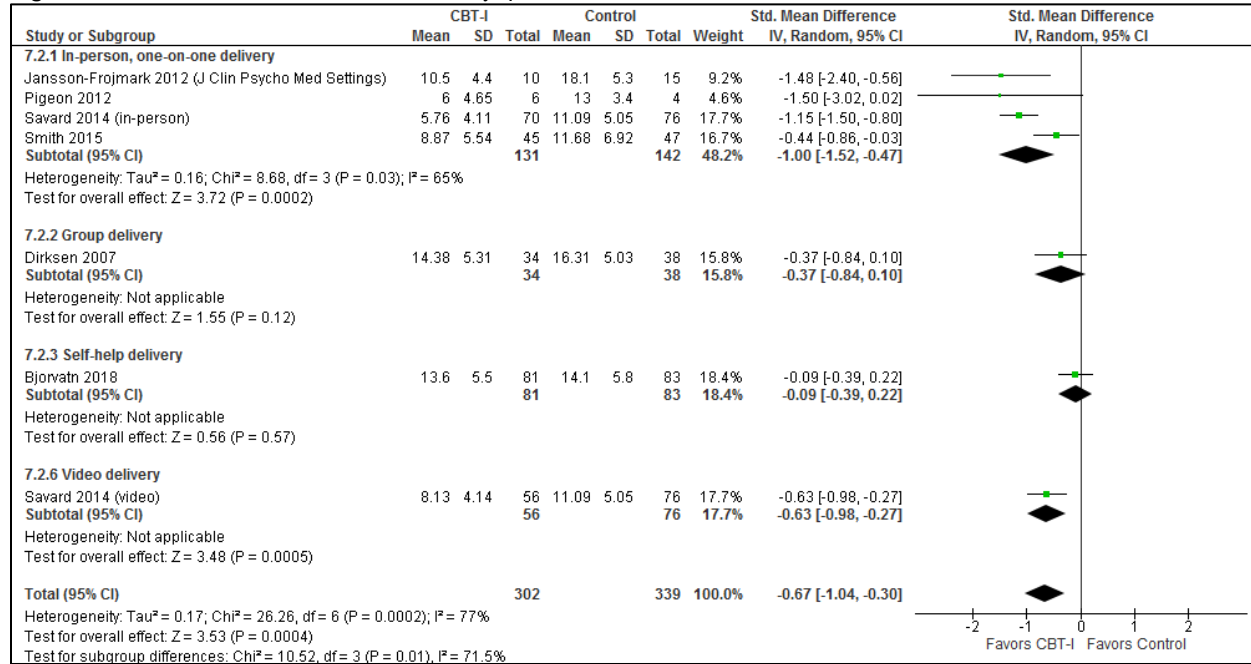

Figure S43. ISQ-determined insomnia severity, post treatment differences, CBT-I vs. control

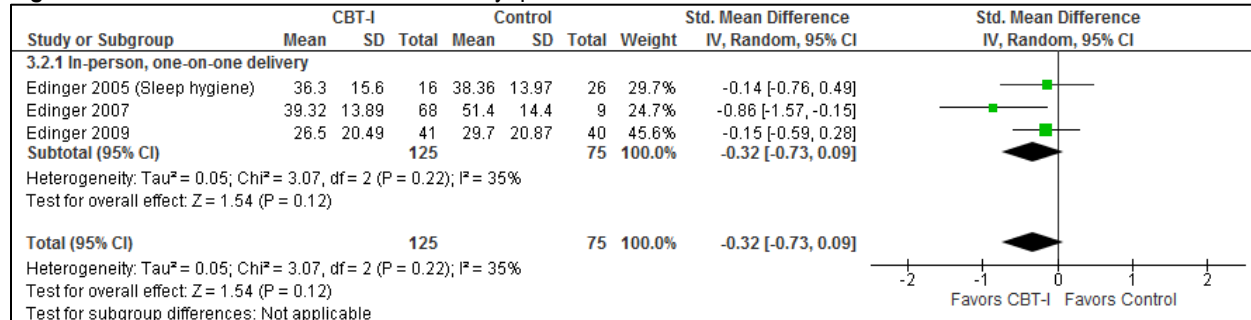

\*Edinger 2005 usual care and sleep hygiene data pooled

Insomnia severity: Insomnia and no comorbidities

Table S15 ISQ-determined insomnia severity, post treatment differences, CBT-I vs. control

| Study        | Delivery method    | CBT-I |       |       | Control |       |       | Std. Mean Difference, [95% CI] |
|--------------|--------------------|-------|-------|-------|---------|-------|-------|--------------------------------|
|              |                    | Mean  | SD    | Total | Mean    | SD    | Total |                                |
| Edinger 2007 | In-person delivery | 39.32 | 13.89 | 68    | 51.4    | 14.4  | 9     | -0.86[-1.57, -0.15]            |
| Edinger 2009 | In-person delivery | 26.5  | 20.49 | 41    | 29.7    | 20.87 | 40    | -0.15[-0.59, 0.28]             |

Insomnia severity: Insomnia and comorbid medical conditions

Table S16. ISQ-determined insomnia severity, post treatment differences, CBT-I vs. control

| Study        | Delivery method    | CBT-I |      |       | Control |       |       | Std. Mean Difference, [95% CI] |
|--------------|--------------------|-------|------|-------|---------|-------|-------|--------------------------------|
|              |                    | Mean  | SD   | Total | Mean    | SD    | Total |                                |
| Edinger 2005 | In-person delivery | 36.3  | 15.6 | 16    | 38.36   | 13.97 | 26    | -0.14[-0.76, -0.49]            |

\*pooled data of sleep hygiene and usual care groups

Insomnia severity: In-person delivery vs. comparison:

Figure S44. ISI-determined insomnia severity, post treatment differences for in-person delivery

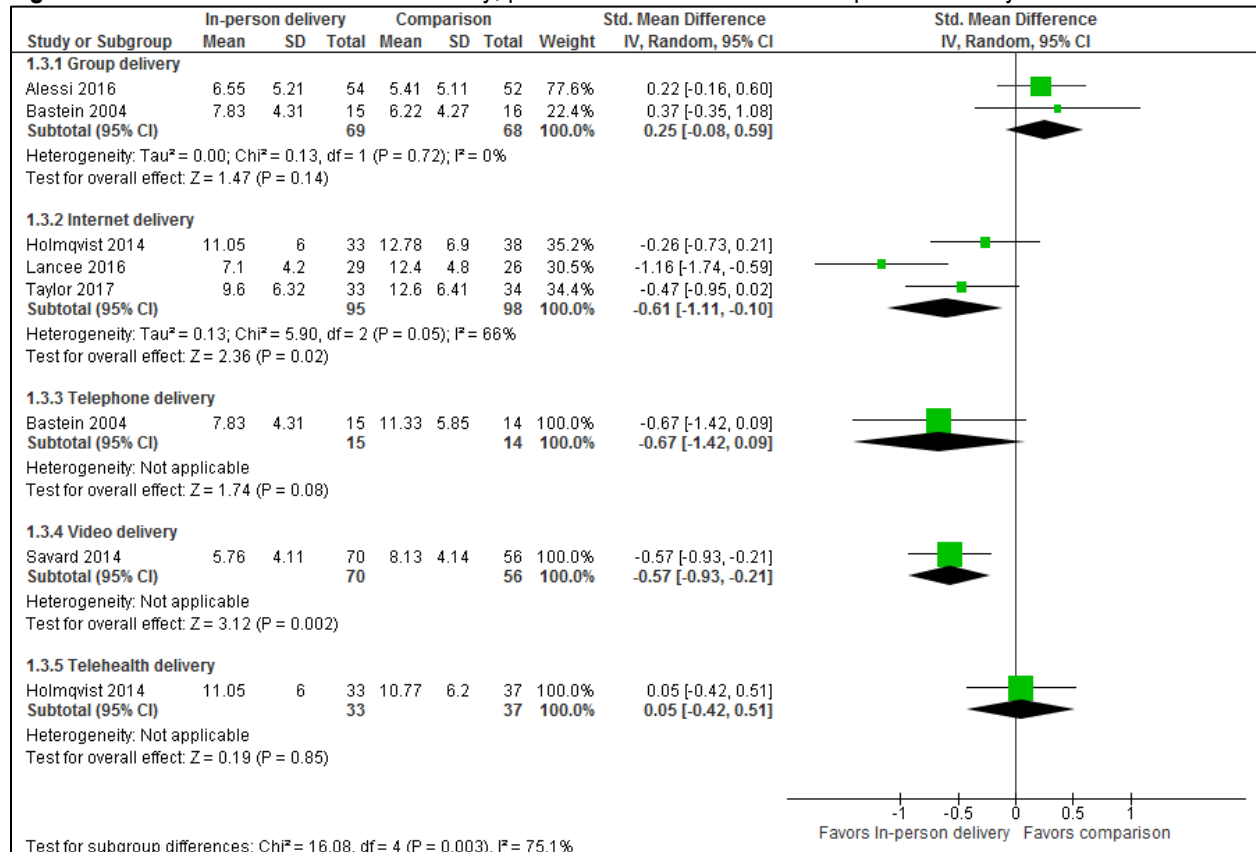

\* each subgroup of delivery method is reported separately in the results section

## Nights using hypnotics

**Figure S45.** Diary-determined nights using hypnotics(nights/week), post treatment differences, CBT-I vs. control

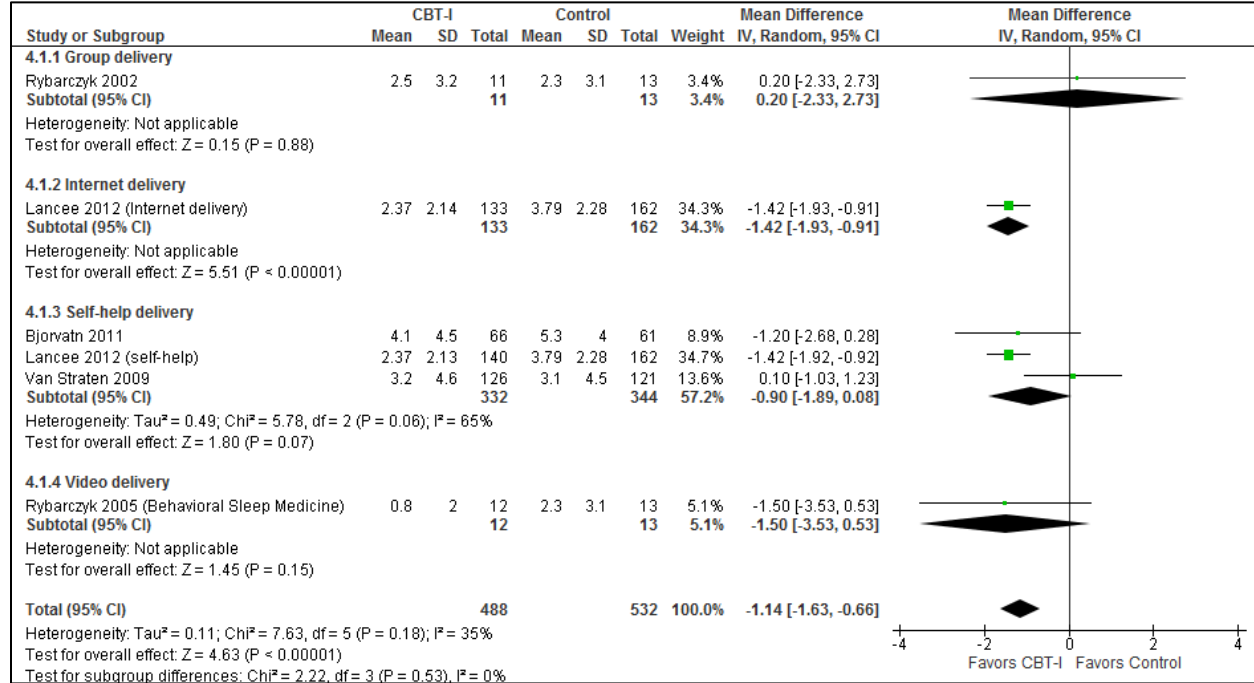

\*Lancee 2012 (internet and self-help) uses same control data

## Nights using hypnotics: Insomnia and no comorbidities

**Table S17.** Diary-determined number of awakenings (no./night), post treatment differences, CBT-I vs. control

| Study      | Delivery method | CBT-I |     |       | Control |     |       | Std. Mean Difference, [95% CI] |
|------------|-----------------|-------|-----|-------|---------|-----|-------|--------------------------------|
|            |                 | Mean  | SD  | Total | Mean    | SD  | Total |                                |
| Morin 1993 | Group delivery  | 2.5   | 3.2 | 11    | 2.3     | 3.1 | 13    | 0.20[-2.33, 2.73]              |

## Nights using hypnotics: Insomnia and comorbid psychiatric conditions

**Table S18.** Diary-determined number of awakenings (no./night), post treatment differences, CBT-I vs. control

| Study          | Delivery method | CBT-I |    |       | Control |     |       | Mean Difference, [95% CI] |
|----------------|-----------------|-------|----|-------|---------|-----|-------|---------------------------|
|                |                 | Mean  | SD | Total | Mean    | SD  | Total |                           |
| Rybarczyk 2005 | Video Delivery  | 0.8   | 2  | 12    | 2.3     | 3.1 | 13    | -1.50[-3.53, 0.53]        |

# Number of nighttime awakenings

**Figure S46.** Diary-determined number of awakenings (no./night), post treatment differences, CBT-I vs. control

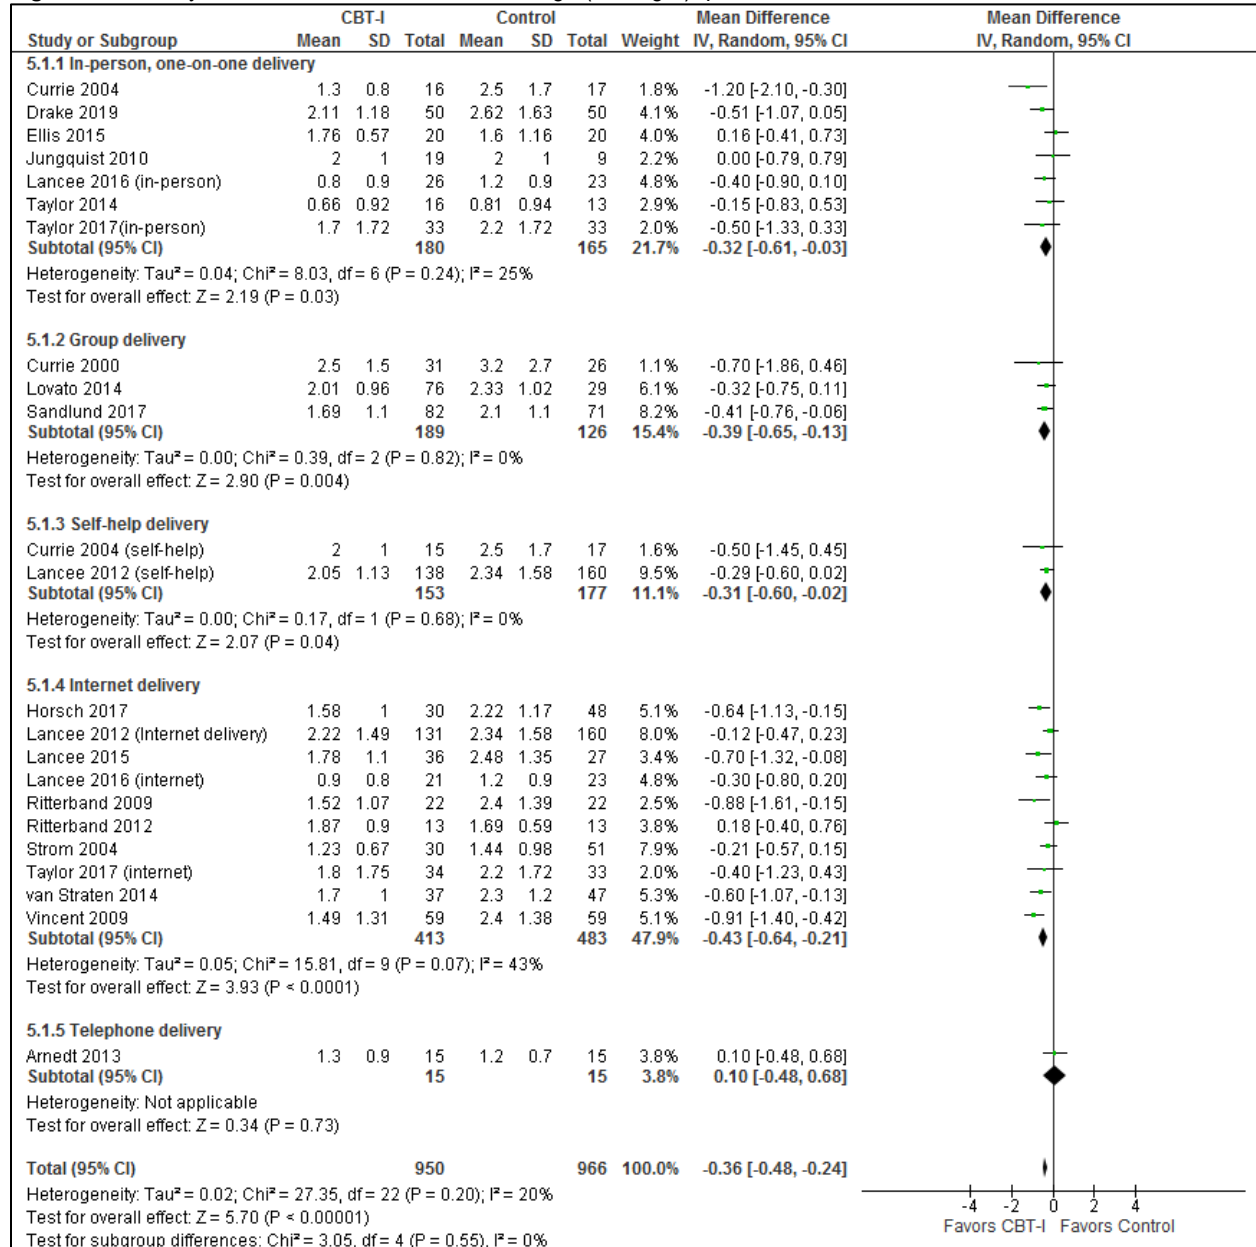

\*Currie 2004 (in-person and self-help) uses same control data  
 Lancee 2012 (internet and self-help) uses same control data  
 Lancee 2016 (in-person and internet) uses same control data  
 \*Taylor 2017 (in-person and internet) uses same control data

Number of awakenings: Insomnia and no comorbidities

**Figure S47.** Diary-determined number of awakenings (no./night), post treatment differences, CBT-I vs. control

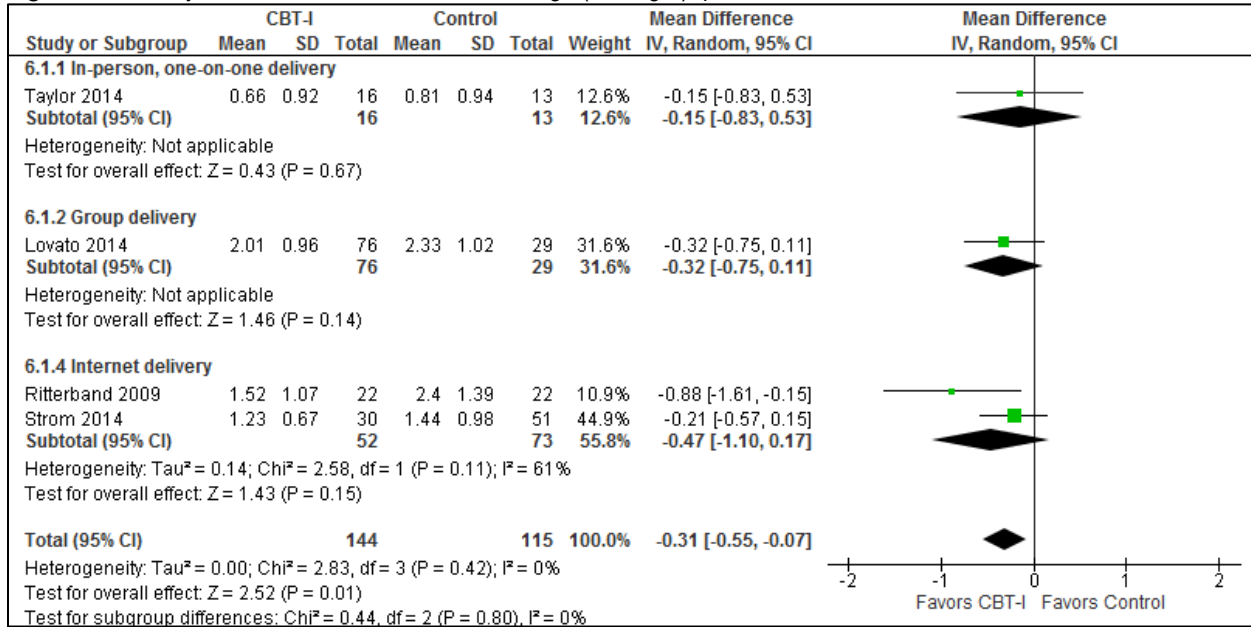

Number of awakenings: Insomnia and comorbid psychiatric conditions

**Table S19.** Diary-determined number of awakenings (no./night), post treatment differences, CBT-I vs. control

| Study          | Delivery method    | CBT-I |     |       | Control |     |       | Mean Difference, [95% CI] |
|----------------|--------------------|-------|-----|-------|---------|-----|-------|---------------------------|
|                |                    | Mean  | SD  | Total | Mean    | SD  | Total |                           |
| Currie 2004    | In-person delivery | 1.64  | 0.9 | 31    | 2.5     | 1.7 | 17    | -0.86[-1.73, 0.01]        |
| Jungquist 2010 | In-person delivery | 2     | 1   | 19    | 2       | 1   | 9     | 0.00[-0.79, 0.79]         |

\*Currie 2004 (self-help and in-person) pooled data

Number of awakenings: Insomnia and comorbid medical conditions

**Table S20.** Diary-determined number of awakenings (no./night), post treatment differences, CBT-I vs. control

| Study           | Delivery method   | CBT-I |     |       | Control |      |       | Mean Difference, [95% CI] |
|-----------------|-------------------|-------|-----|-------|---------|------|-------|---------------------------|
|                 |                   | Mean  | SD  | Total | Mean    | SD   | Total |                           |
| Currie 2000     | group delivery    | 2.5   | 1.5 | 31    | 3.2     | 2.7  | 26    | -0.70[-1.86, 0.46]        |
| Ritterband 2012 | internet delivery | 1.87  | 0.9 | 13    | 1.69    | 0.59 | 13    | 0.18[-0.40, 0.76]         |

Number of awakenings: In-person delivery vs. comparison:

**Figure S48.** Diary-determined number of awakenings (no./night), post treatment differences for in-person delivery

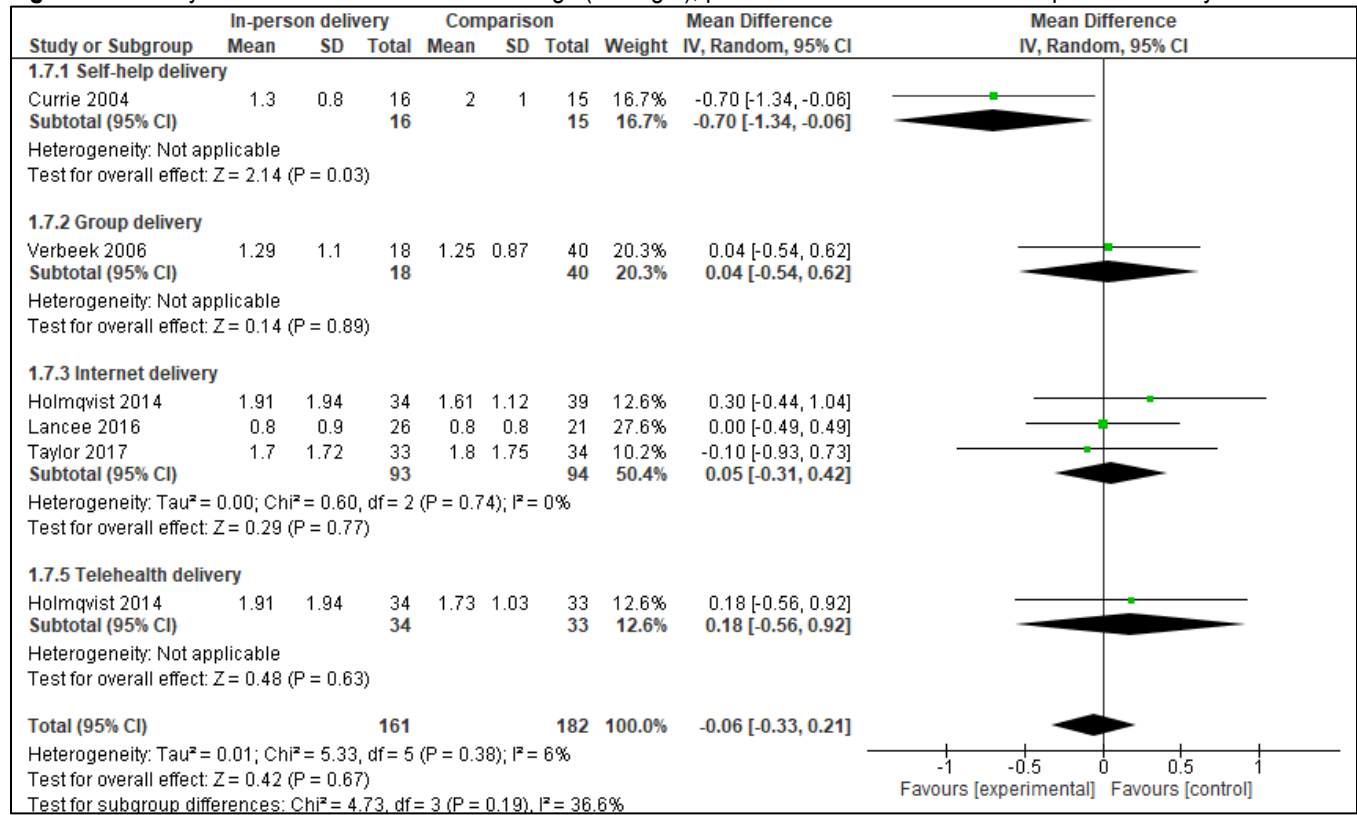

\* each subgroup of delivery method is reported separately in the results section

# Sleep efficiency

## Figure S49. Diary-determined sleep efficiency (%), post treatment differences, CBT-I vs. control

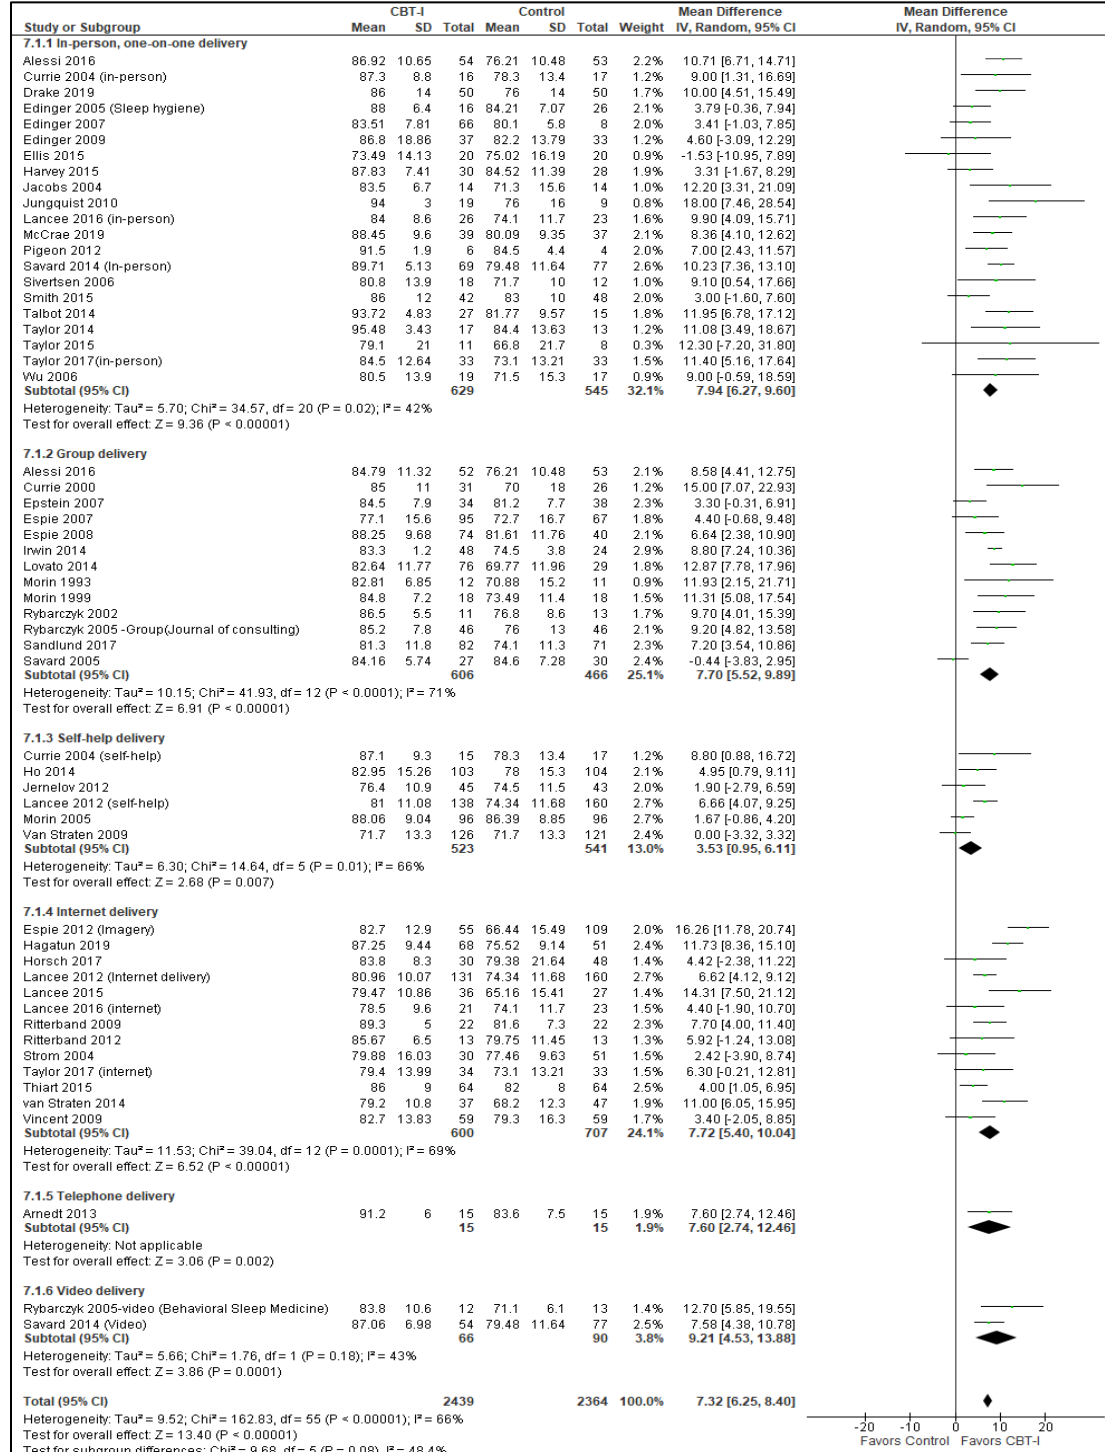

\*Currie 2004 (in-person and self-help) uses same control data  
 Edinger 2005 usual and sleep hygiene pooled control data  
 Lancee 2012 (internet and self-help) uses same control data  
 Lancee 2016 (in-person and internet) uses same control data  
 Savard 2014 (in-person and video) uses same control data  
 Espie 2012 (imagery and usual care pooled control data)  
 Taylor 2017 (in-person and internet) uses same control data, converted SE to SD  
 Morin 2005 SD calculated from 95% CI  
 Alessi 2016 (in-person and group) uses same control data, converted SE to SD

Sleep efficiency (Diary): Insomnia and no comorbidities

Figure S50. Diary-determined sleep efficiency (%), post treatment differences, CBT-I vs. control

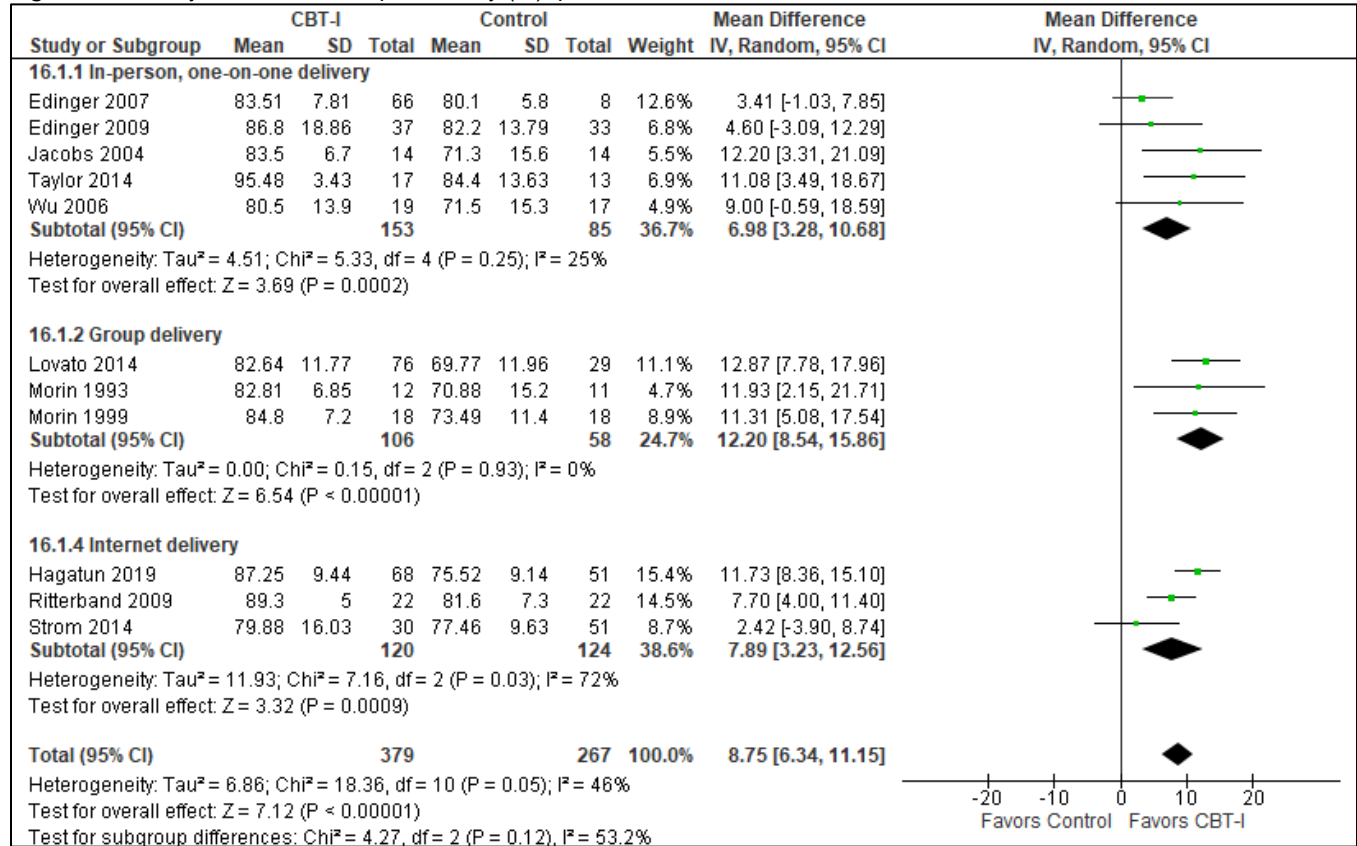

Sleep efficiency (Diary): Insomnia and comorbid psychiatric conditions

Figure S51. Diary-determined sleep efficiency (%), post treatment differences, CBT-I vs. control

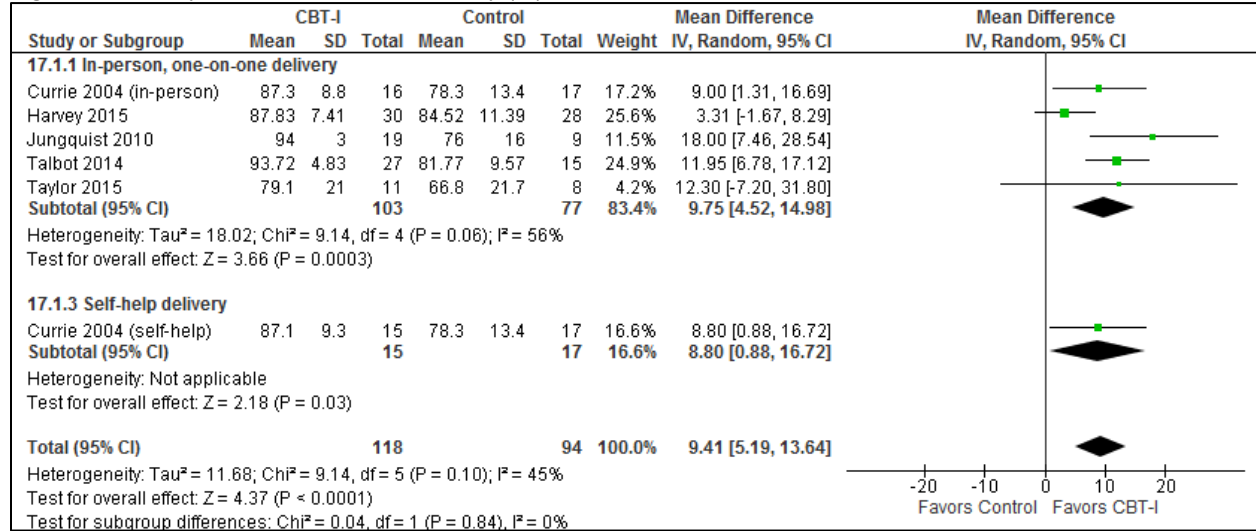



Sleep efficiency (Diary): Comorbid medical insomnia

Figure S52. Diary-determined sleep efficiency (%), post treatment differences, CBT-I vs. control

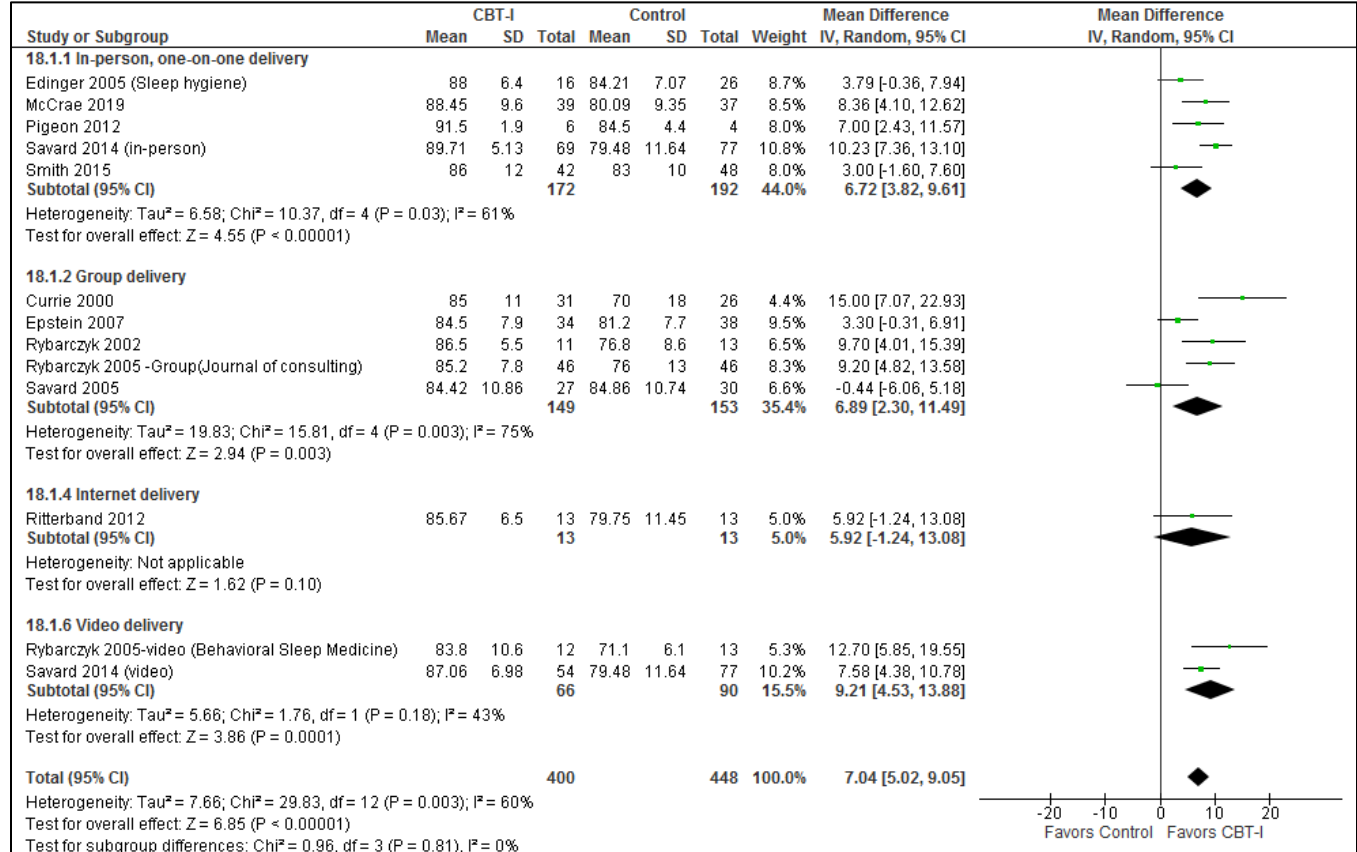

\*pooled control data (usual care and sleep hygiene) for Edinger 2005

## Sleep efficiency (Actigraphy)

**Figure S53.** Actigraphy-determined sleep efficiency (%), post treatment differences, CBT-I vs. control

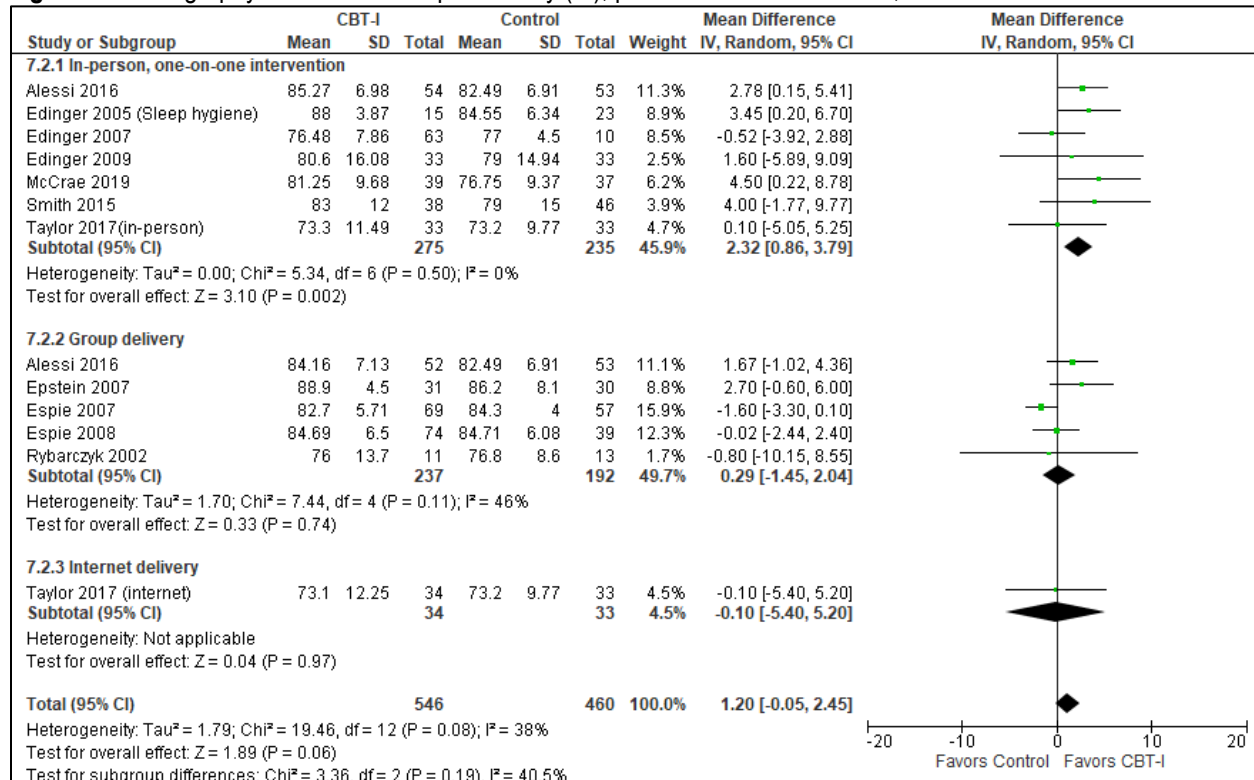

\* Edinger 2005 (usual and sleep hygiene control data pooled) converted SE to SD  
 Taylor 2017 (in-person and internet) uses same control data, converted SE to SD  
 Alessi 2016 (in-person and group) uses same control data, converted SE to SD

## Sleep efficiency (Act): Insomnia and no comorbidities

**Table S21.** Actigraphy-determined sleep efficiency (%), post treatment differences, CBT-I vs. control

| Study        | Delivery method       | CBT-I |       |       | Control |       |       | Mean Difference, [95% CI] |
|--------------|-----------------------|-------|-------|-------|---------|-------|-------|---------------------------|
|              |                       | Mean  | SD    | Total | Mean    | SD    | Total |                           |
| Edinger 2007 | In-person, one-on-one | 76.48 | 7.86  | 63    | 77      | 4.5   | 10    | -0.52[-3.92, 2.88]        |
| Edinger 2009 | In-person, one-on-one | 80.6  | 16.08 | 33    | 79      | 14.94 | 33    | 1.60[-5.89, 9.09]         |

## Sleep efficiency (Act): Insomnia and comorbid psychiatric conditions

**Table S22.** Actigraphy-determined sleep efficiency (%), post treatment differences, CBT-I vs. control

| Study          | Delivery method | CBT-I |      |       | Control |     |       | Mean Difference, [95% CI] |
|----------------|-----------------|-------|------|-------|---------|-----|-------|---------------------------|
|                |                 | Mean  | SD   | Total | Mean    | SD  | Total |                           |
| Rybarczyk 2002 | Group delivery  | 76    | 13.7 | 11    | 76.8    | 8.6 | 13    | -0.80 [-10.15, 8.55]      |

Sleep efficiency (Act): Comorbid medical insomnia

Figure S54. Actigraphy-determined sleep efficiency (%), post treatment differences, CBT-I vs. control

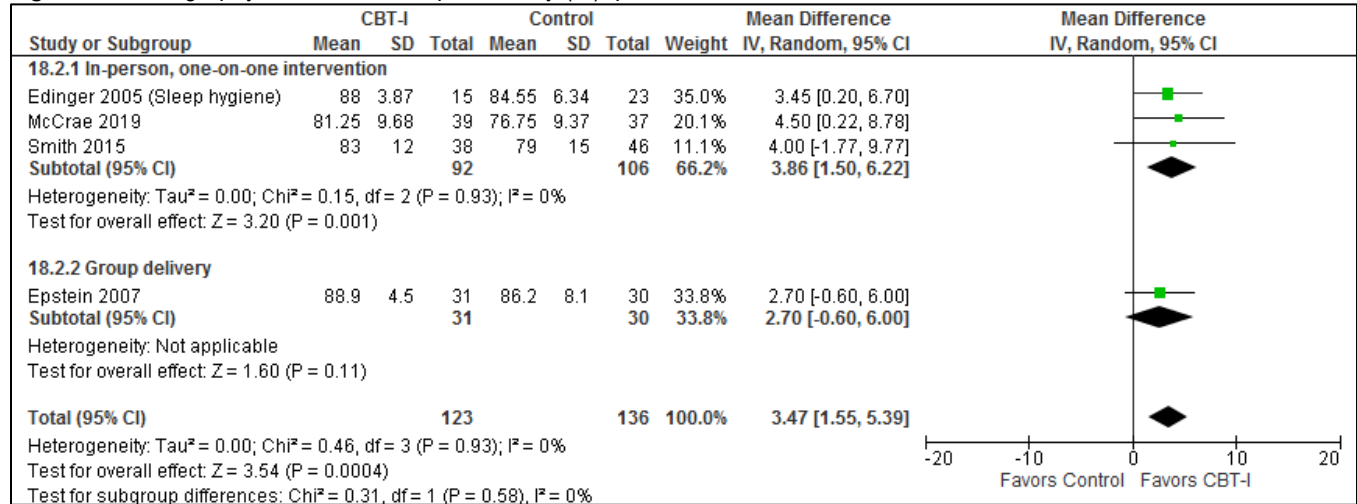

\*pooled control data (usual care and sleep hygiene) for Edinger 2005

Sleep efficiency (PSG)

Figure S55. PSG-determined sleep efficiency (%), post treatment differences, CBT-I vs. control

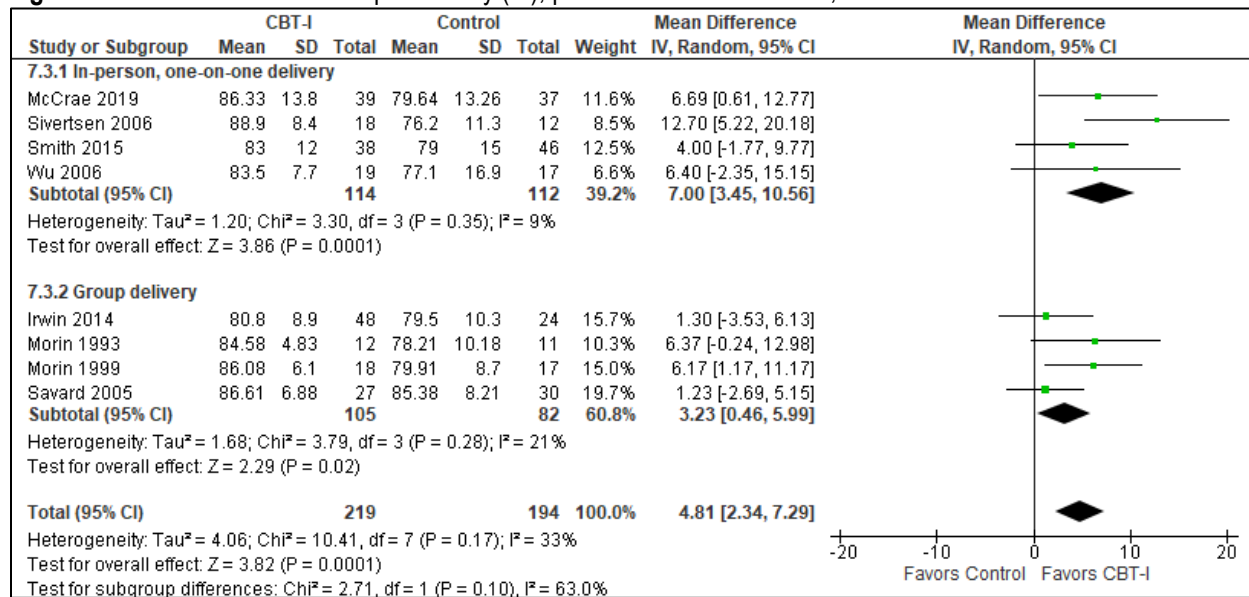

Sleep efficiency (PSG): Insomnia and no comorbidities

Figure S56. PSG-determined sleep efficiency (%), post treatment differences, CBT-I vs. control

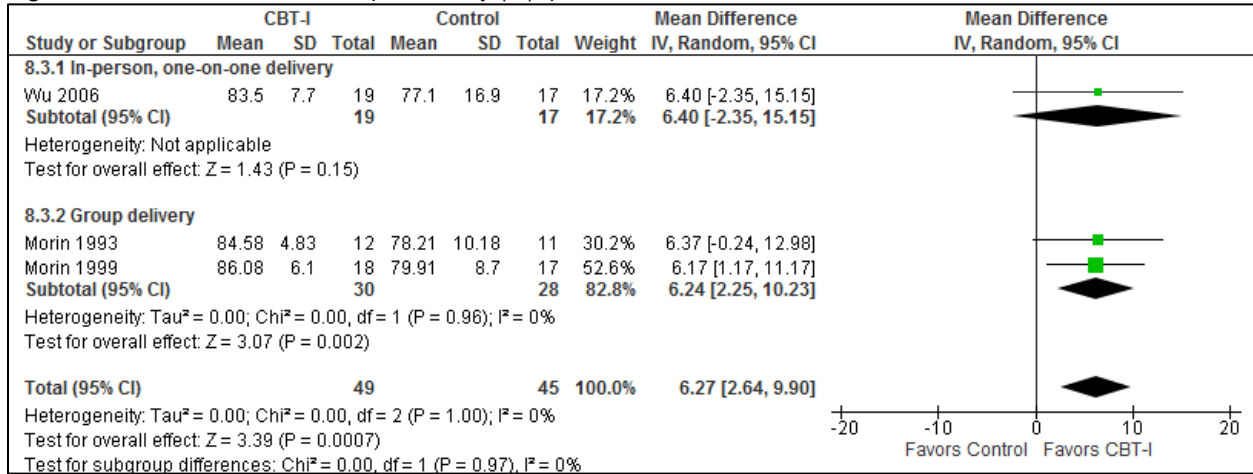

Sleep efficiency (PSG): Comorbid medical insomnia

Figure S57. PSG-determined sleep efficiency (%), post treatment differences, CBT-I vs. control

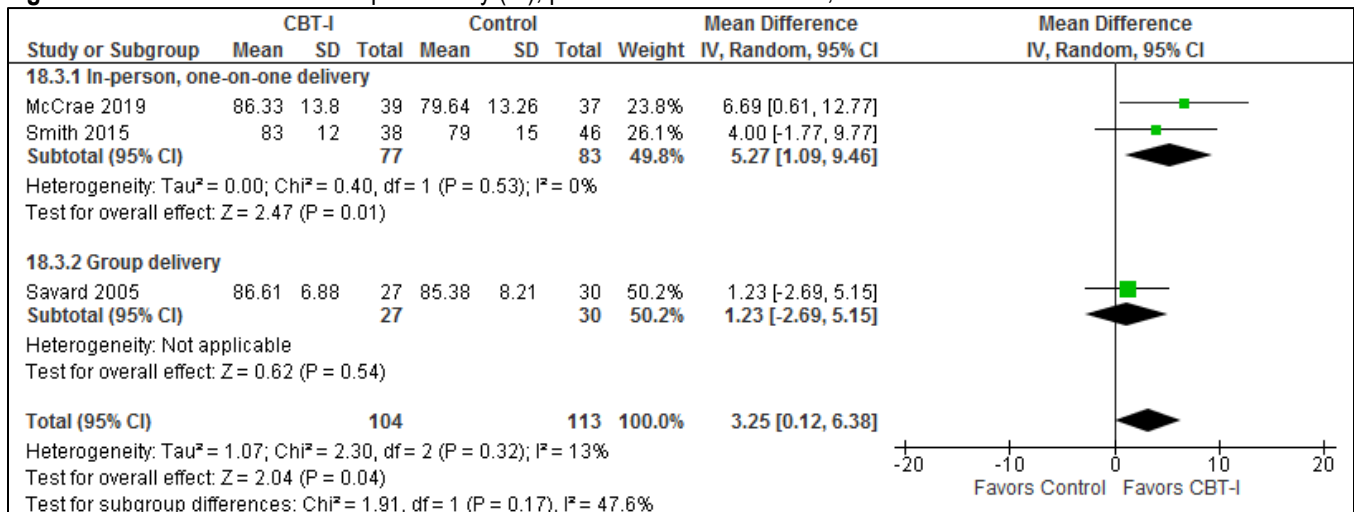

Sleep efficiency (Diary): In-person delivery vs. comparison:

Figure S58. Diary-determined sleep efficiency, post treatment differences for in-person delivery

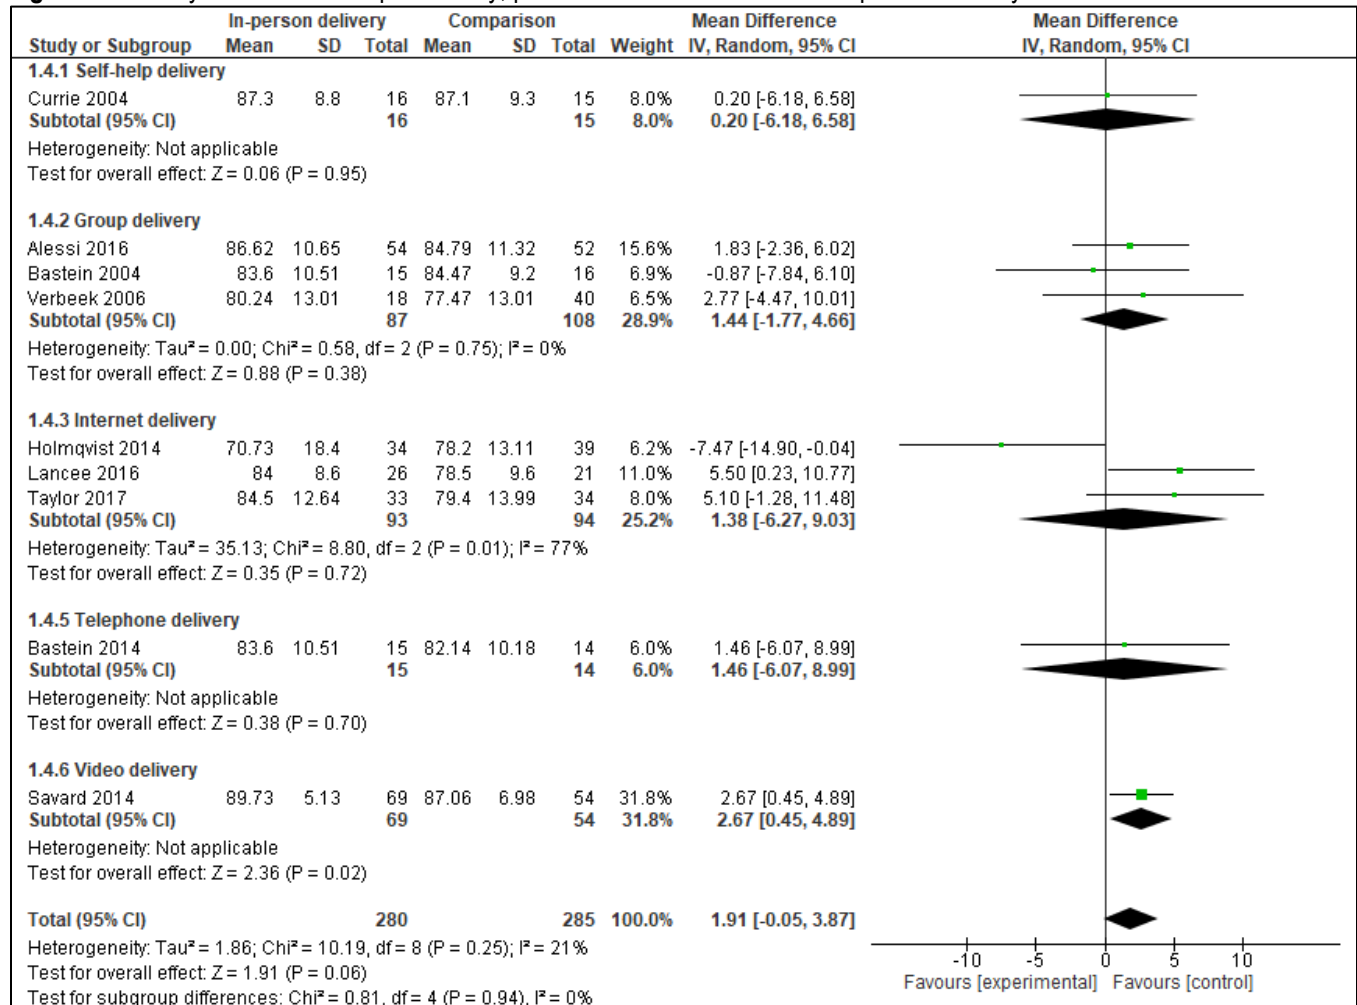

\* each subgroup of delivery method is reported separately in the results section

Sleep efficiency (Act): In-person delivery vs. comparison:

Figure S59. Actigraphy-determined sleep efficiency, post treatment differences for in-person delivery

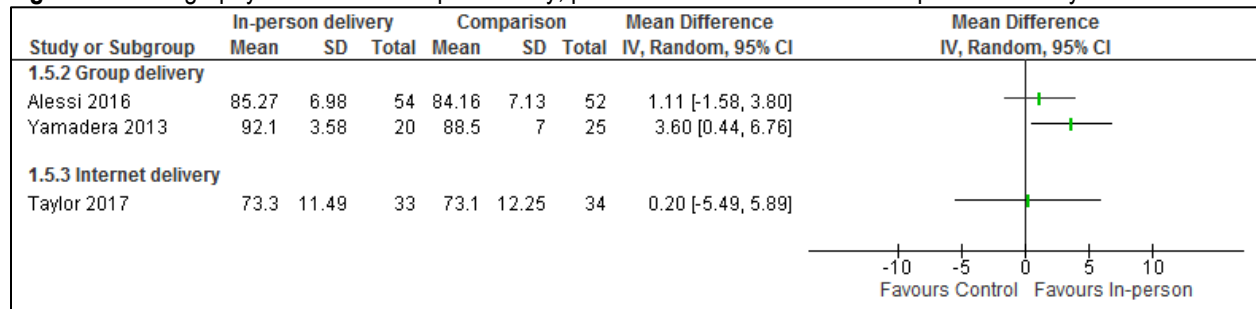

\* each subgroup of delivery method is reported separately in the results section

## Total wake time

**Figure S60.** Diary-determined total wake time (minutes), post treatment differences, CBT-I vs. control

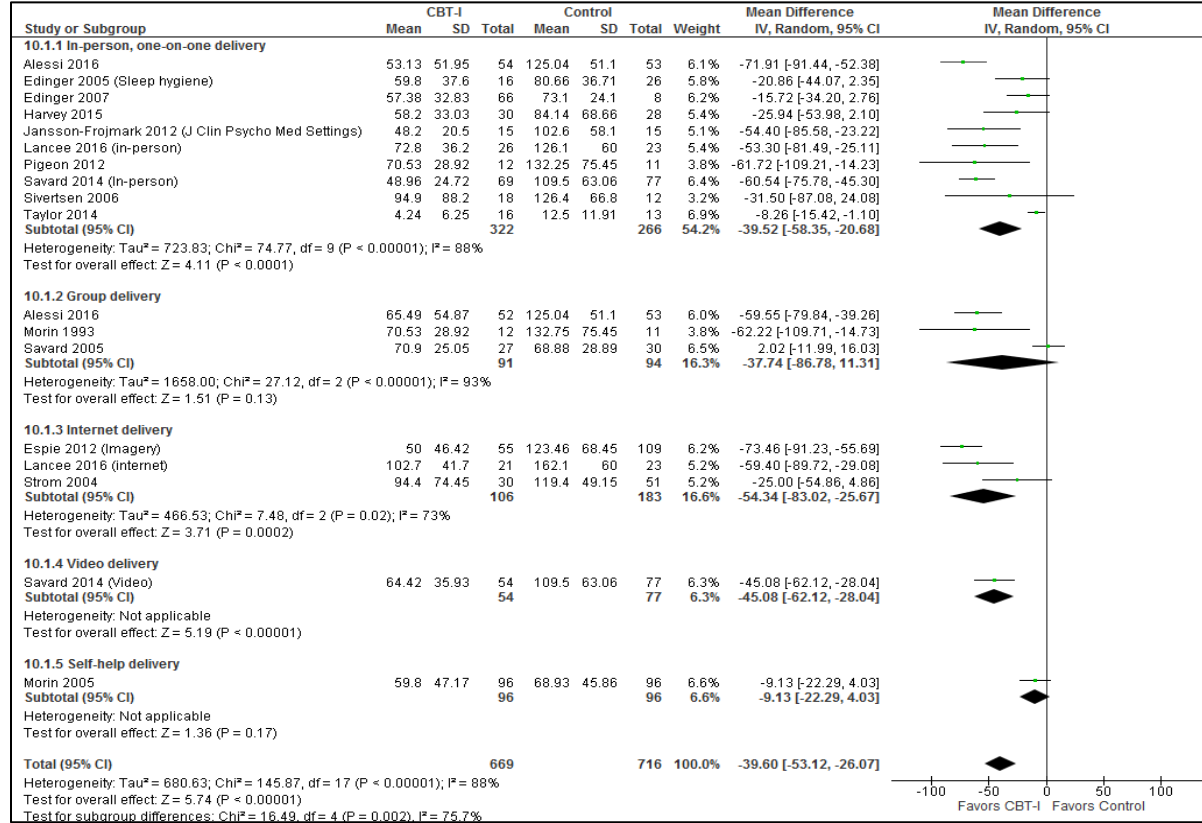

\*Edinger 2005 usual and sleep hygiene pooled control data, SE converted to SD  
 Lancee 2016 (in-person and internet) uses same control data  
 Savard 2014 (in-person and video) uses same control data  
 Espie 2012 (imagery and usual care pooled data, SE converted to SD)  
 Morin 2005 SD calculated using 95%CI  
 Alessi 2016 (in-person and group) uses same control data, SE converted to SD

## Total wake time (Diary): Insomnia and no comorbidities

**Figure S61.** Diary-determined total wake time (minutes), post treatment differences, CBT-I vs. control

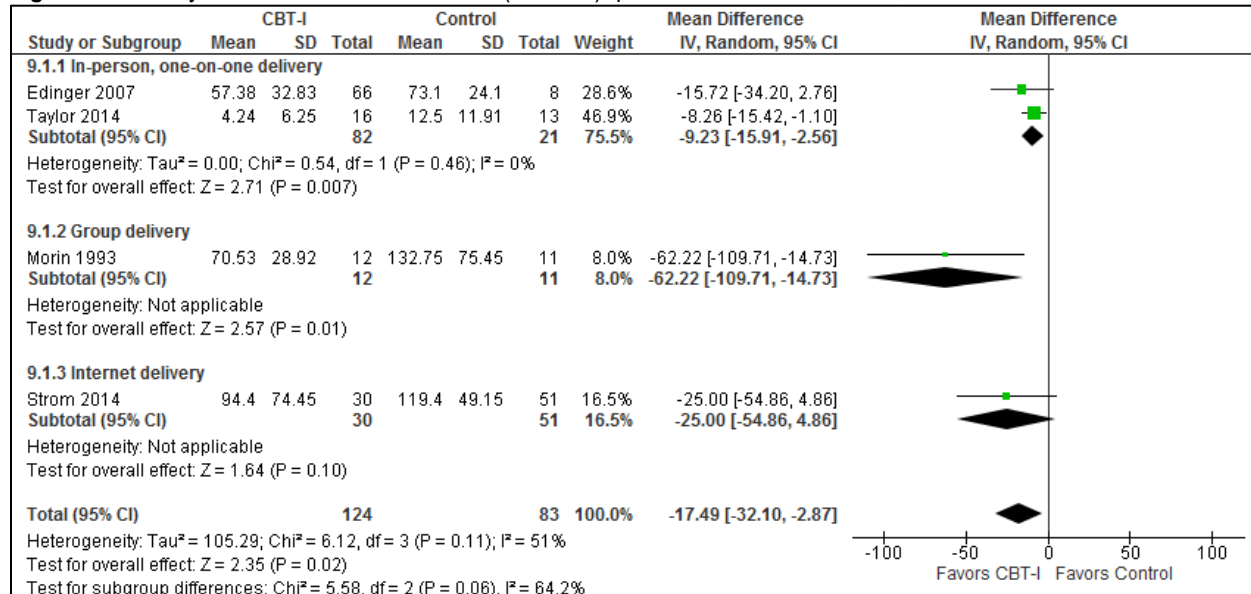

Total wake time: Insomnia and comorbid psychiatric conditions

**Table S23.** Diary-determined total wake time (minutes), post treatment differences, CBT-I vs. control

| Study       | Delivery method       | CBT-I |       |       | Control |       |       | Mean Difference, [95% CI] |
|-------------|-----------------------|-------|-------|-------|---------|-------|-------|---------------------------|
|             |                       | Mean  | SD    | Total | Mean    | SD    | Total |                           |
| Harvey 2015 | In-person, one-on-one | 58.2  | 33.03 | 30    | 84.14   | 68.66 | 28    | -25.94 [-53.98, 2.10]     |

Total wake time: Insomnia and comorbid medical conditions

**Figure S62.** Diary-determined total wake time (minutes), post treatment differences, CBT-I vs. control

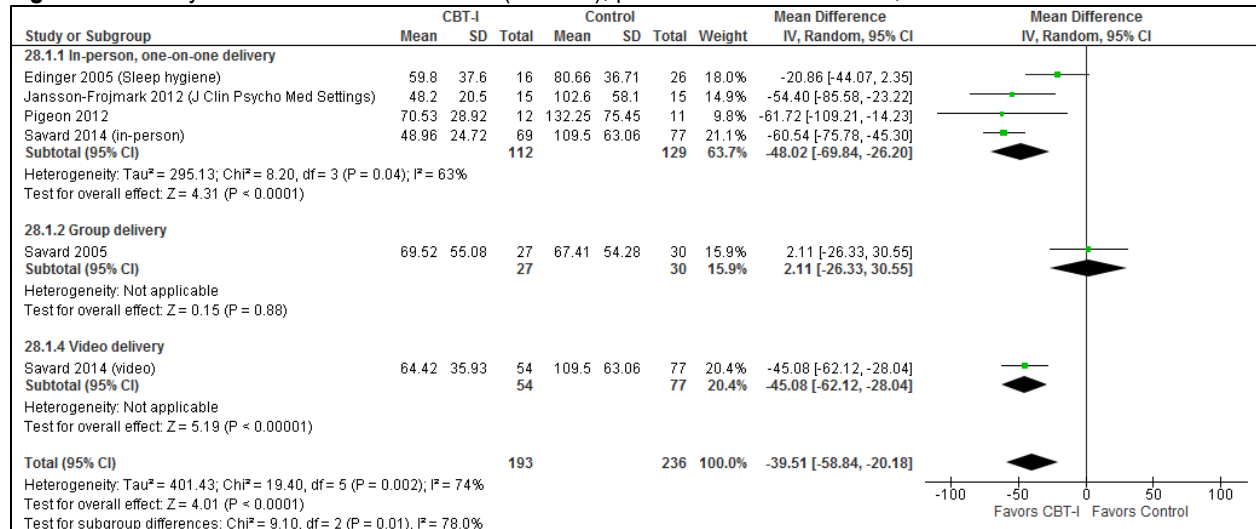

\*pooled control data (usual care and sleep hygiene) for Edinger 2005

Total wake time (Actigraphy)

**Figure S63.** Actigraphy-determined total wake time (minutes), post treatment differences, CBT-I vs. control

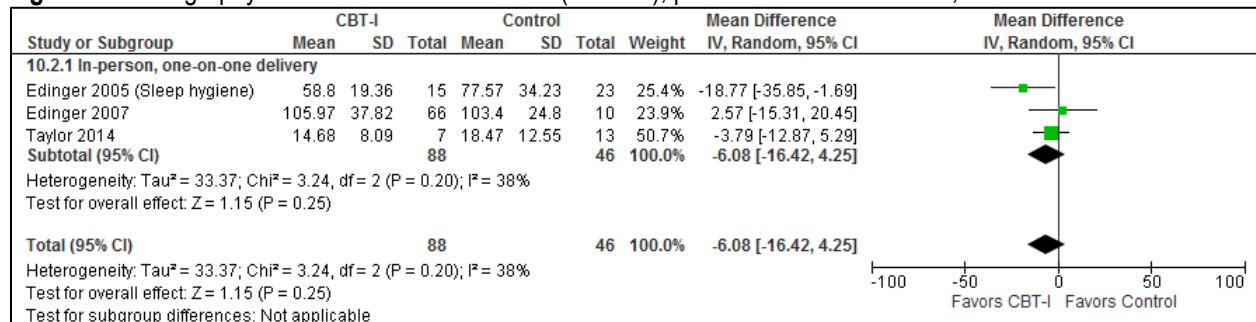

\*Edinger 2005 usual and sleep hygiene pooled control data, SE converted to SD

Total wake time (Actigraphy): Insomnia and comorbid psychiatric conditions

**Table S24.** Act-determined total wake time (minutes), post treatment differences, CBT-I vs. control

| Study        | Delivery method       | CBT-I  |       |       | Control |       |       | Mean Difference, [95% CI] |
|--------------|-----------------------|--------|-------|-------|---------|-------|-------|---------------------------|
|              |                       | Mean   | SD    | Total | Mean    | SD    | Total |                           |
| Edinger 2007 | In-person, one-on-one | 105.97 | 37.82 | 66    | 103.4   | 24.8  | 10    | 2.57 [-15.31, 20.45]      |
| Taylor 2014  | In-person, one-on-one | 14.68  | 8.09  | 7     | 18.47   | 12.55 | 13    | -3.79[-12.87, 5.29]       |

Total wake time: Insomnia and comorbid medical conditions

**Table S25.** Act-determined total wake time (minutes), post treatment differences, CBT-I vs. control

| Study        | Delivery method       | CBT-I |       |       | Control |       |       | Mean Difference, [95% CI] |
|--------------|-----------------------|-------|-------|-------|---------|-------|-------|---------------------------|
|              |                       | Mean  | SD    | Total | Mean    | SD    | Total |                           |
| Edinger 2005 | In-person, one-on-one | 58.8  | 19.36 | 15    | 77.57   | 34.23 | 23    | -18.77[-35.85, -1.69]     |

\*pooled control data (usual care and sleep hygiene) for Edinger 2005

Total wake time (PSG)

**Figure S64.** PSG-determined total wake time (minutes), post treatment differences, CBT-I vs. control

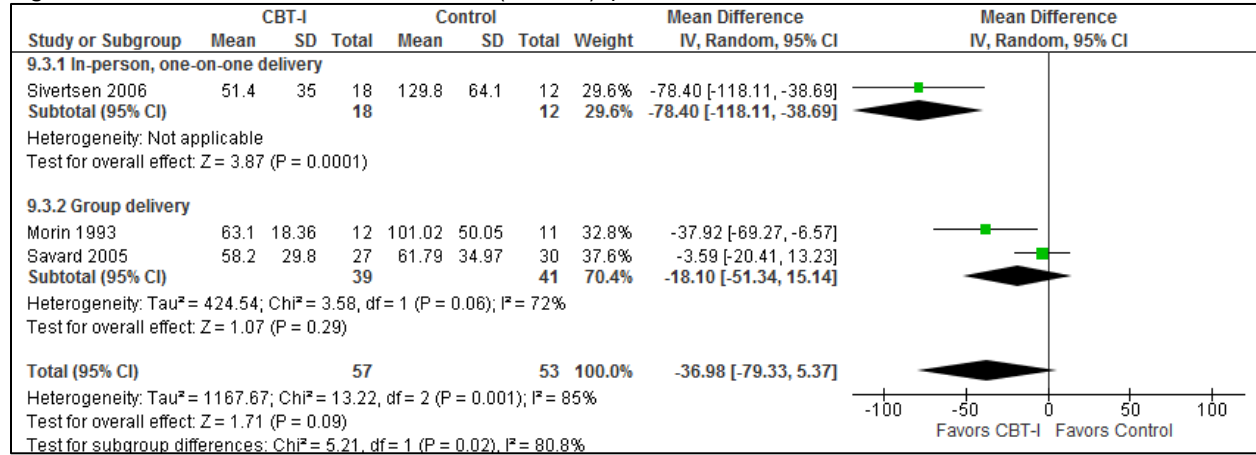

Total wake time (PSG): Insomnia and no comorbidities

**Table S26.** PSG-determined total wake time (minutes), post treatment differences, CBT-I vs. control

| Study      | Delivery method | CBT-I |       |       | Control |       |       | Mean Difference, [95% CI] |
|------------|-----------------|-------|-------|-------|---------|-------|-------|---------------------------|
|            |                 | Mean  | SD    | Total | Mean    | SD    | Total |                           |
| Morin 1993 | Group delivery  | 63.1  | 18.36 | 12    | 101.02  | 50.05 | 11    | -37.92 [-69.27, -6.57]    |



Total wake time (Diary): In-person delivery vs. comparison:

Figure S65. Diary-determined total wake time (minutes), post treatment differences for in-person delivery

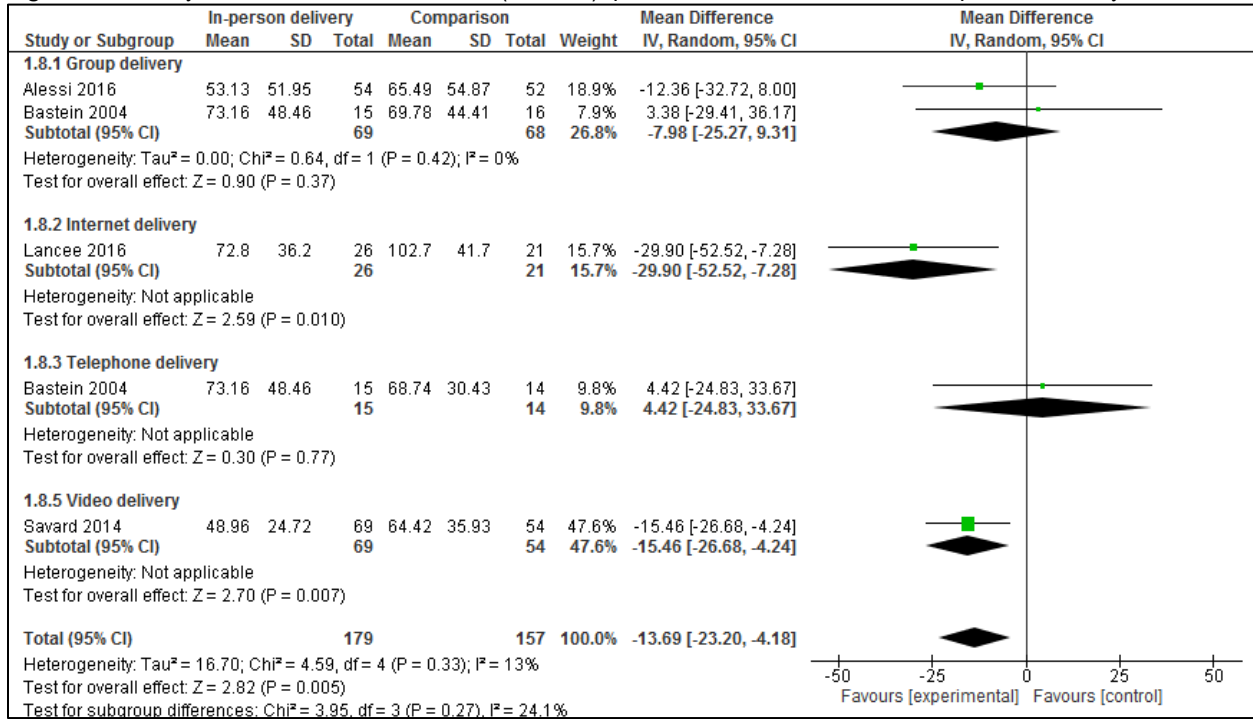

\* each

subgroup of delivery method is reported separately in the results section

# Total sleep time

## Figure S66. Diary-determined TST (minutes), post treatment differences, CBT-I vs. control

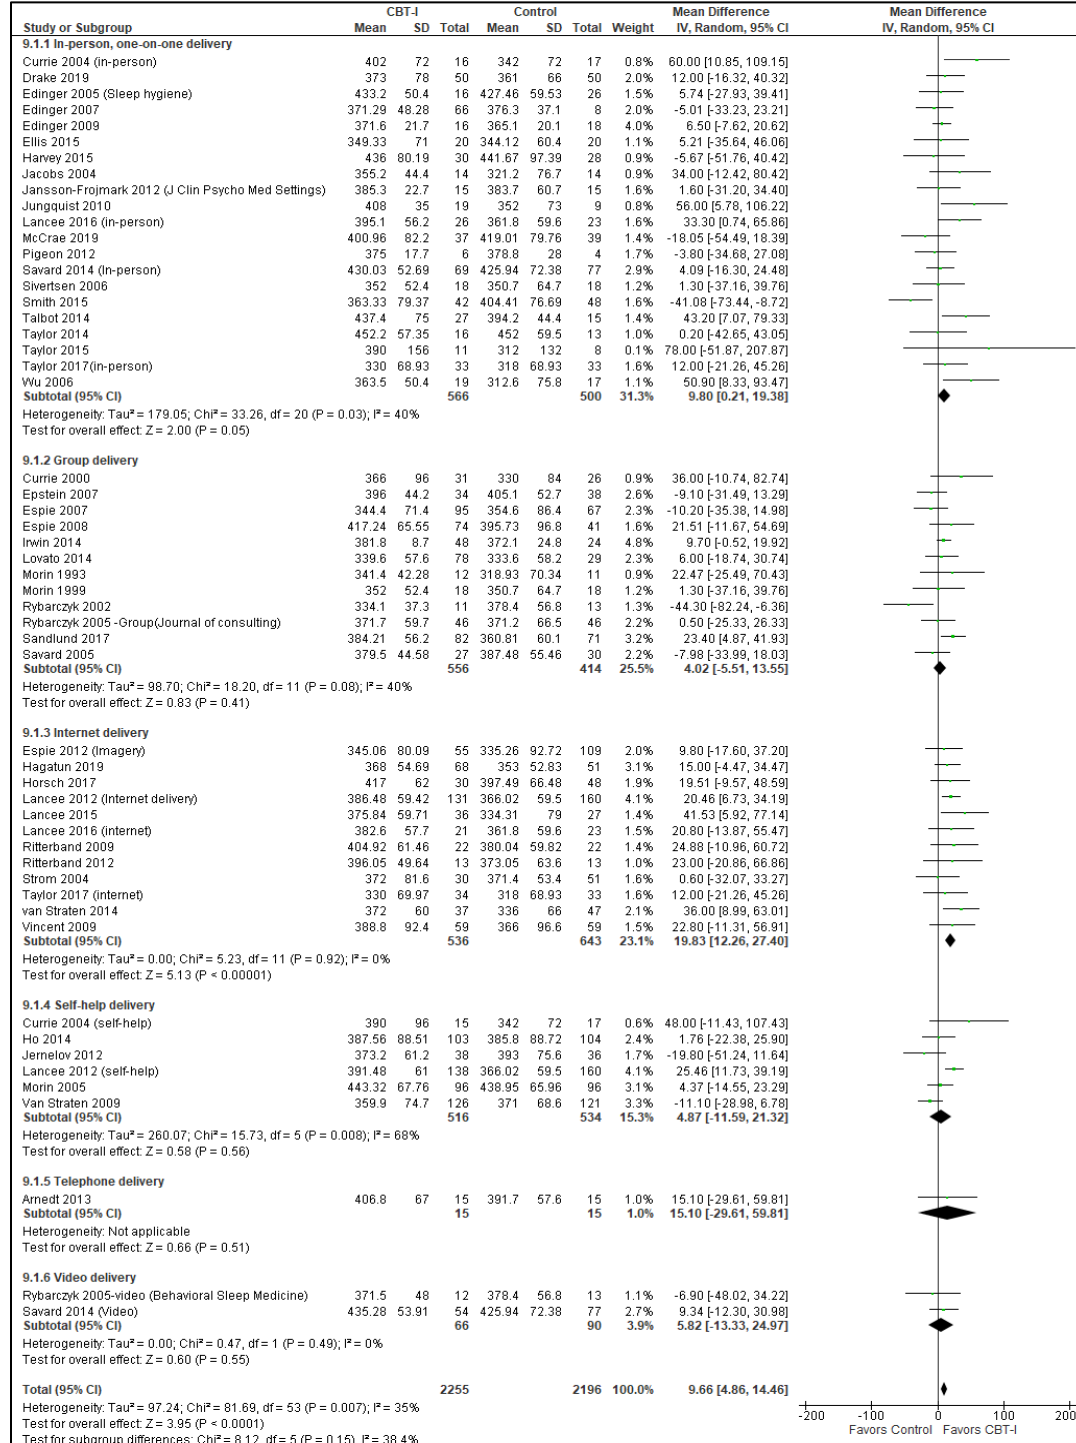

\*Currie 2004 (in-person and self-help) uses same control data  
 Edinger 2005 (usual and sleep hygiene) pooled control data, converted SE to SD  
 Lancee 2012 (internet and self-help) uses same control data  
 Lancee 2016 (in-person and internet) uses same control data  
 Savard 2014 (in-person and video) uses same control data  
 Espie 2012 (imagery and usual care) pooled control data, converted SE to SD  
 Taylor 2017 (in-person and internet) uses same control data, converted SE to SD

Total sleep time (Diary): Insomnia and no comorbidities

Figure S67. Diary-determined total sleep time (minutes), post treatment differences, CBT-I vs. control

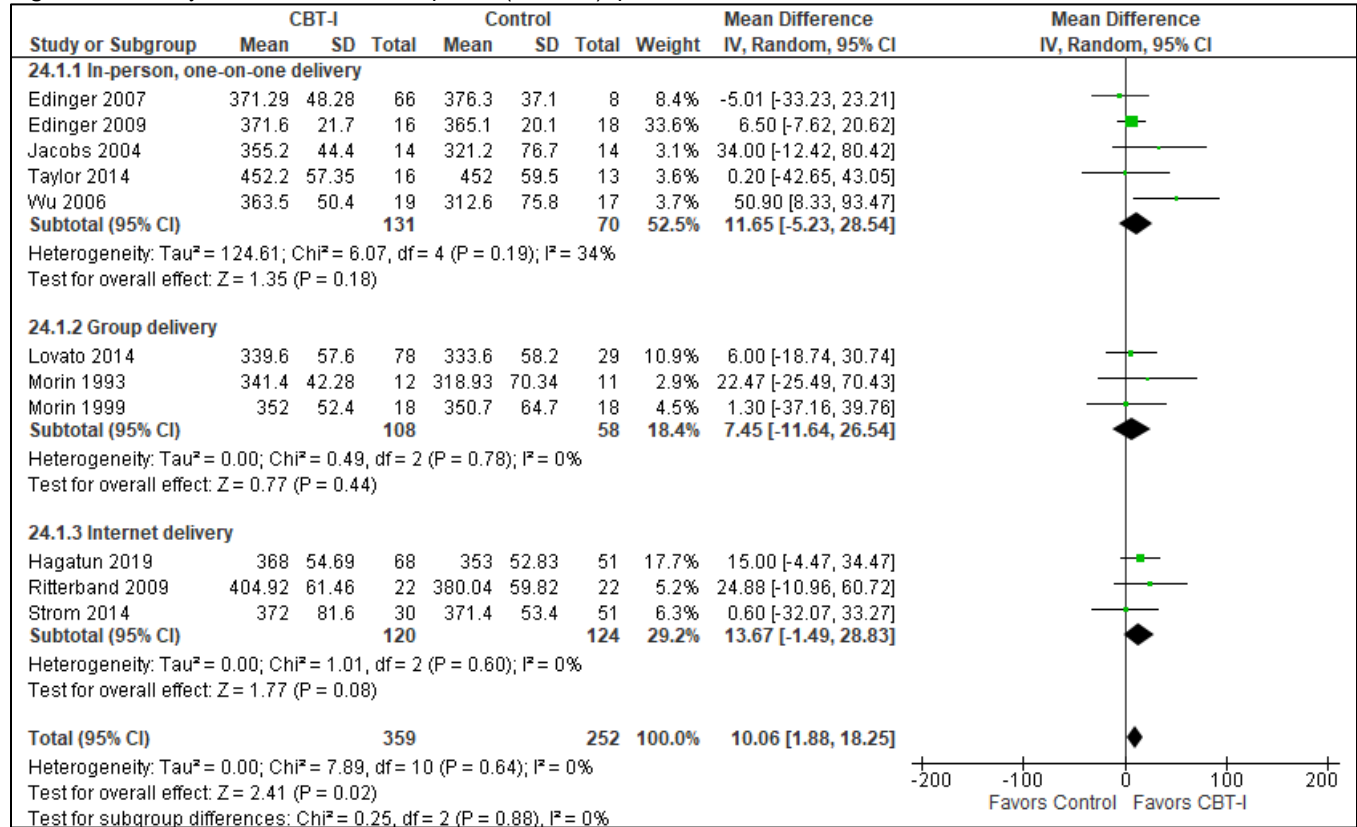

Total sleep time (Diary): Insomnia and comorbid psychiatric conditions

Figure S68. Diary-determined total sleep time (minutes), post treatment differences, CBT-I vs. control

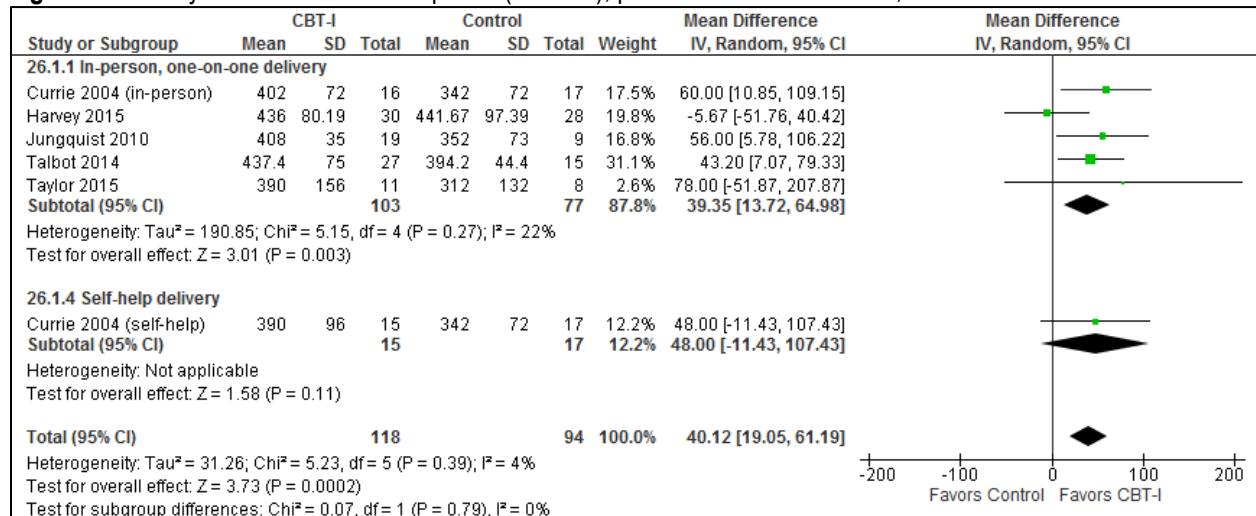

Total sleep time (Diary): Insomnia and comorbid medical conditions

Figure S69. Diary-determined total sleep time (minutes), post treatment differences, CBT-I vs. control

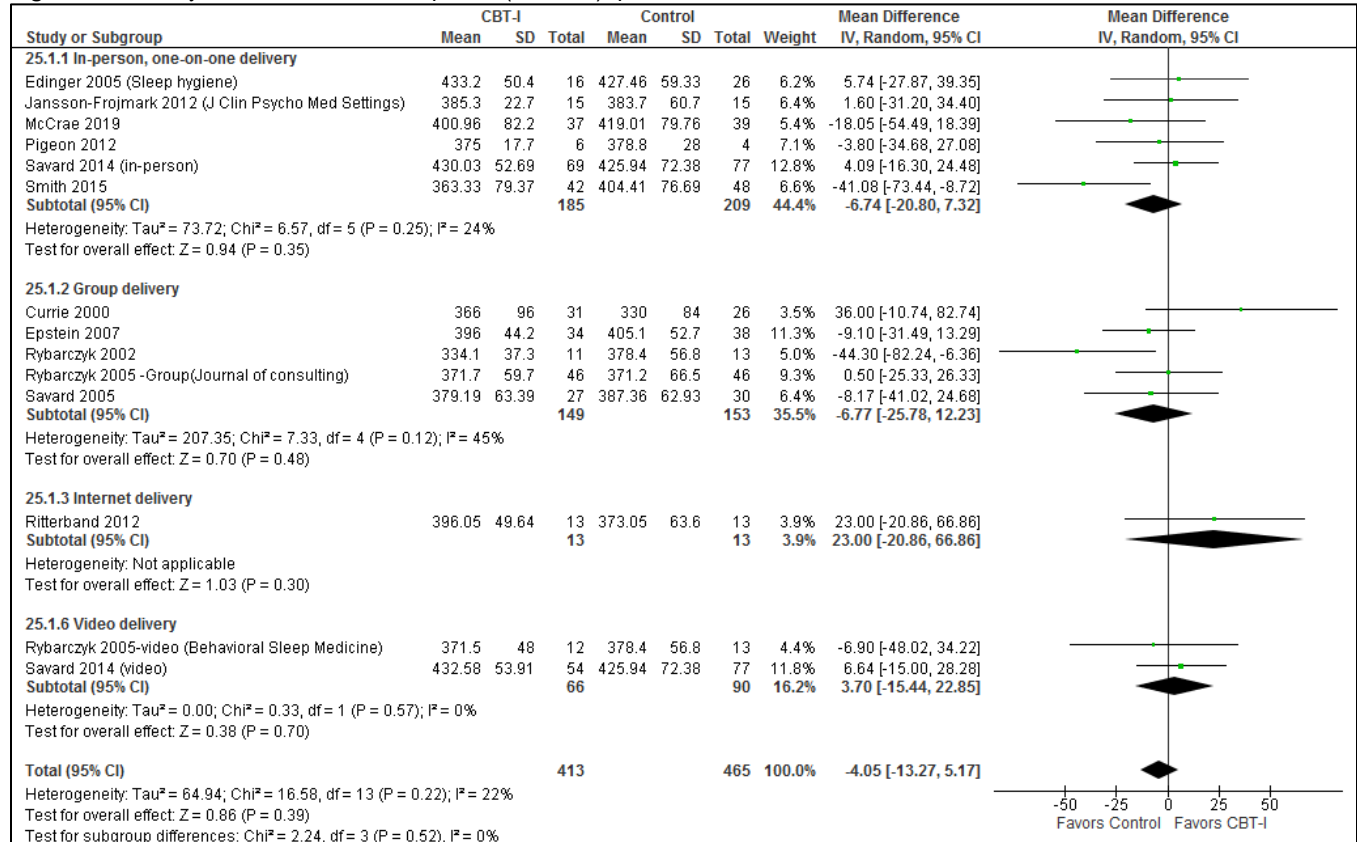

\*pooled control data (usual care and sleep hygiene) for Edinger 2005

Total sleep time (Actigraphy)

Figure S70. Actigraphy-determined total sleep time (minutes), post treatment differences, CBT-I vs. control

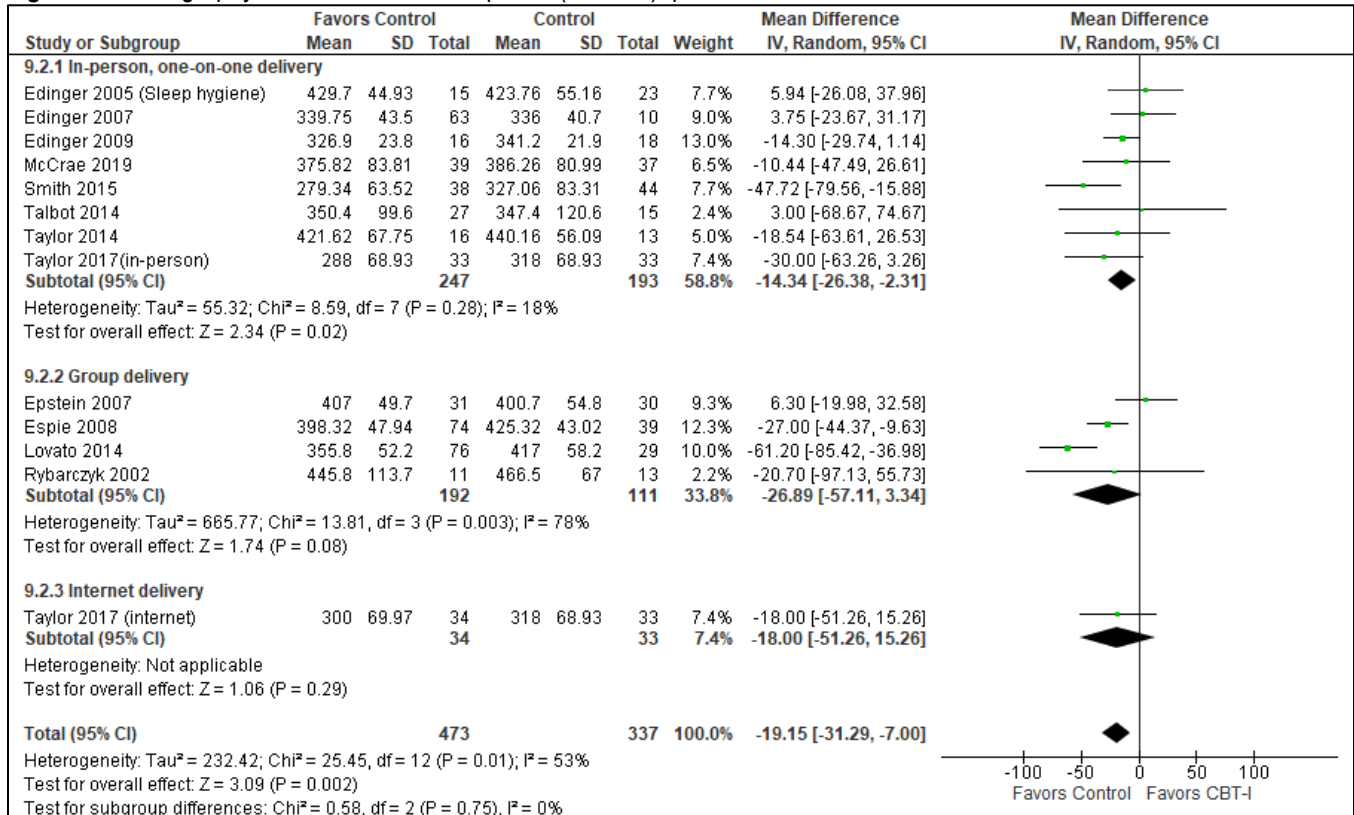

\*Edinger 2005 (usual and sleep hygiene) pooled control data, converted SE to SD  
 Taylor 2017 (in-person and internet) uses same control data, converted SE to SD

Total sleep time (Act): Insomnia and no comorbidities

Figure S71. Actigraphy-determined total sleep time (minutes), post treatment differences, CBT-I vs. control

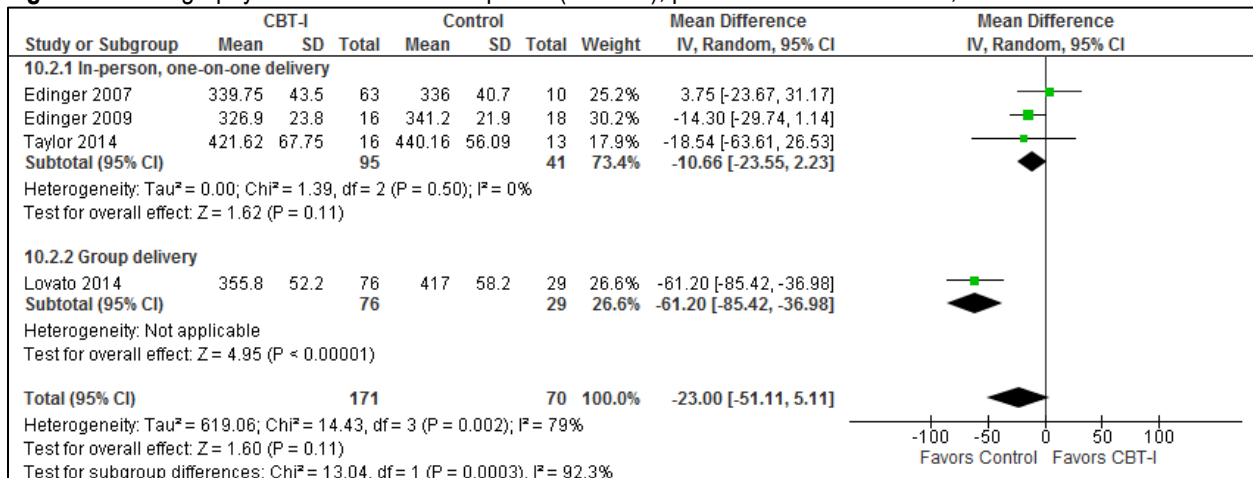

Total sleep time (Act): Insomnia and comorbid psychiatric conditions

**Table S27.** Actigraphy-determined total sleep time (minutes), post treatment differences, CBT-I vs. control

| Study       | Delivery method       | CBT-I |      |       | Control |       |       | Mean Difference, [95% CI] |
|-------------|-----------------------|-------|------|-------|---------|-------|-------|---------------------------|
|             |                       | Mean  | SD   | Total | Mean    | SD    | Total |                           |
| Talbot 2014 | In-person, one-on-one | 350.4 | 99.6 | 27    | 347.4   | 120.6 | 15    | 3.00[-68.67, 74.67]       |

Total sleep time (Act): Insomnia and comorbid medical conditions

**Figure S72.** Actigraphy-determined total sleep time (minutes), post treatment differences, CBT-I vs. control

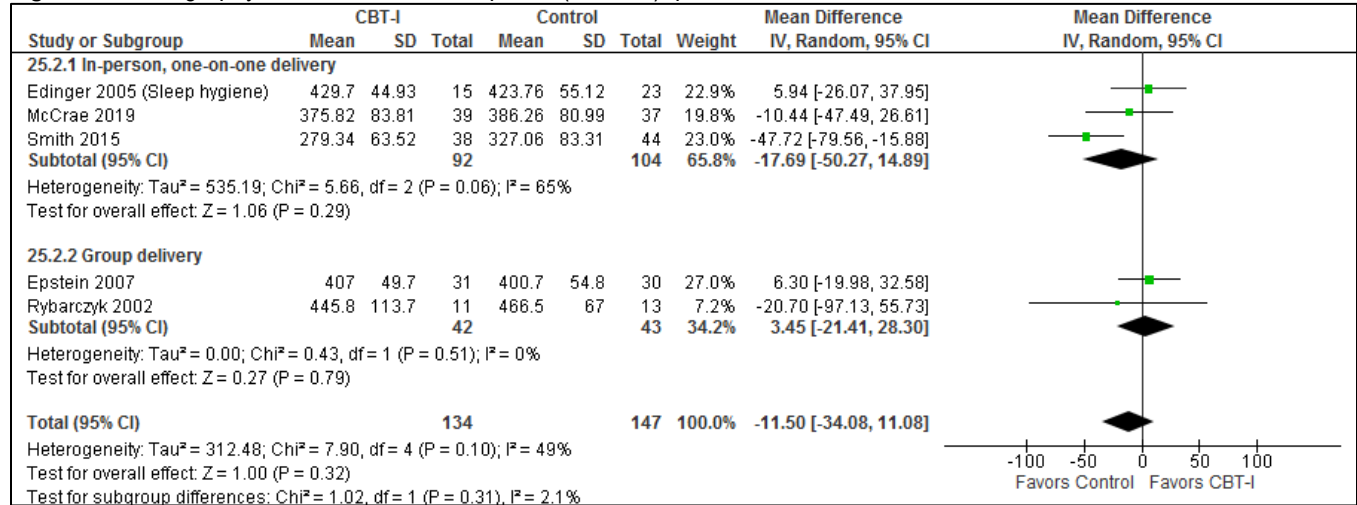

Total sleep time (PSG)

**Figure S73.** PSG-determined total sleep time (minutes), post treatment differences, CBT-I vs. control

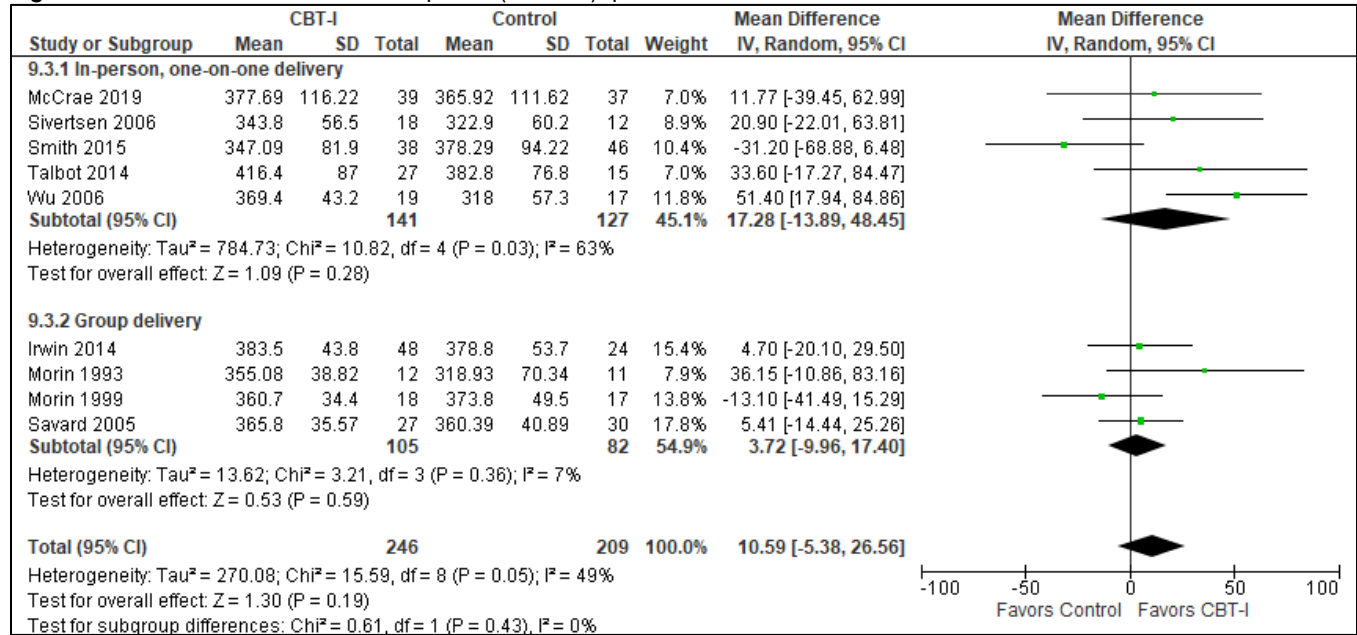

Total sleep time (PSG): Insomnia and no comorbidities

Figure S74. PSG-determined total sleep time (minutes), post treatment differences, CBT-I vs. control

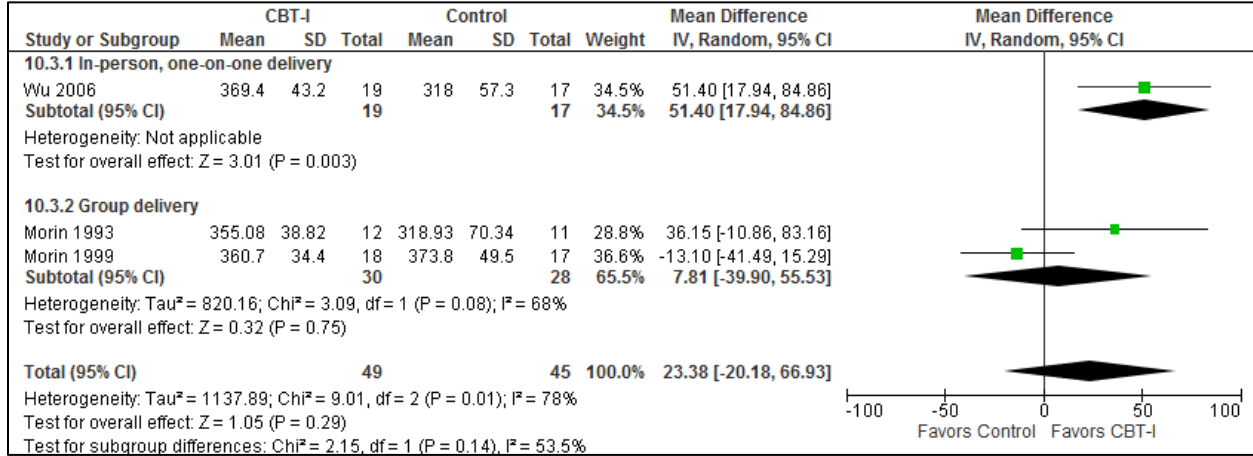

Total sleep time (PSG): Insomnia and comorbid psychiatric conditions

Table S28. PSG-determined total sleep time (minutes), post treatment differences, CBT-I vs. control

| Study       | Delivery method       | CBT-I |    |       | Control |      |       | Mean Difference, [95% CI] |
|-------------|-----------------------|-------|----|-------|---------|------|-------|---------------------------|
|             |                       | Mean  | SD | Total | Mean    | SD   | Total |                           |
| Talbot 2014 | In-person, one-on-one | 416.4 | 87 | 27    | 382.8   | 76.8 | 15    | 33.60 [-17.27, 84.47]     |

Total sleep time: Insomnia and comorbid medical conditions (PSG)

Figure S75. PSG-determined total sleep time (minutes), post treatment differences, CBT-I vs. control

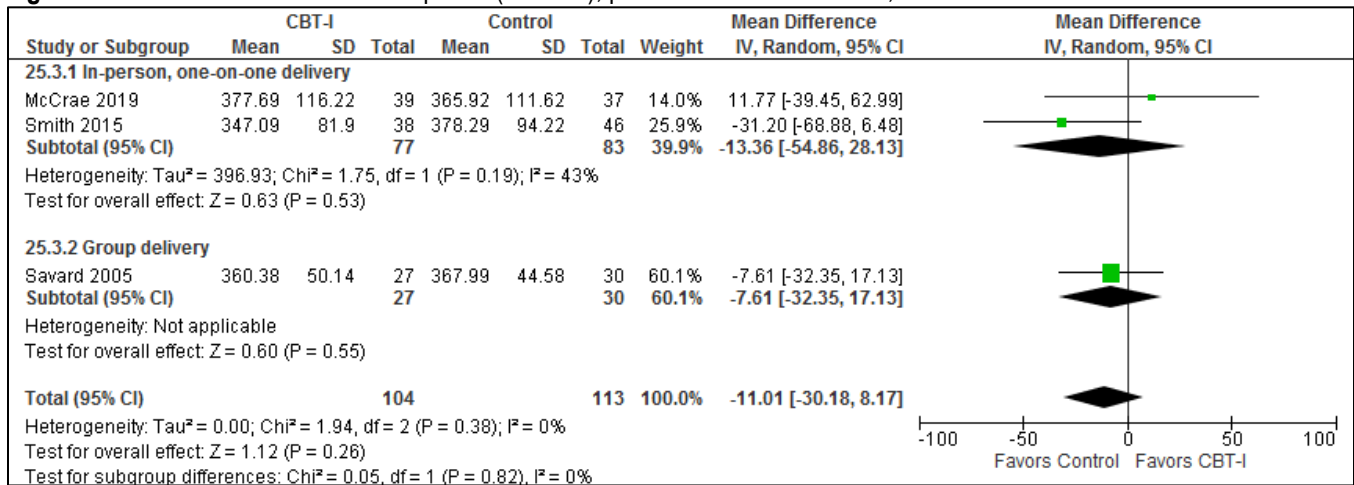

Total sleep time (Diary): In-person delivery vs. comparison:

Figure S76. Diary-determined sleep efficiency, post treatment differences for in-person delivery

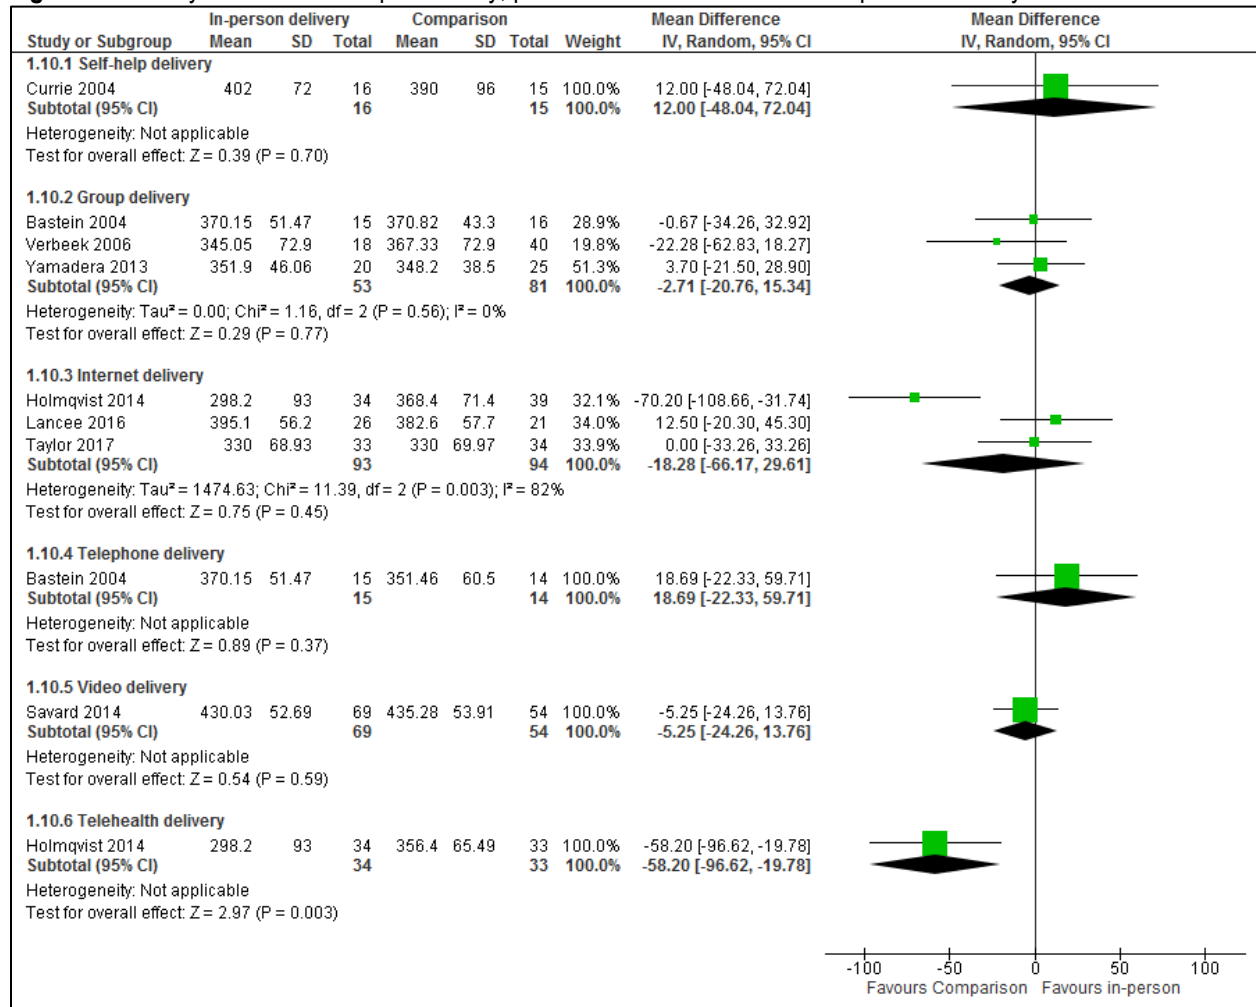

subgroup of delivery method is reported separately in the results section

\* each



**Table S29.** Summary of findings table for CBT-I for the psychological and behavioral treatment of insomnia in adults

**References:** Currie 2004 (A); Jansson-Frojmark 2012 (B); Lancee 2016 (C); Taylor 2014 (D); Epstein 2007 (E); Espie 2012 (F); Lancee 2015 (G) Strom 2004 (H); Vincent 2009 (I); Arnedt 2013 (J); Ho 2014 (K); Jernelov 2012 (L); Van Straten 2009 (M); Edinger 2005 (N) ); Edinger 2007 (O); Edinger 2009 (P) ; Ellis 2015 (Q); Harvey 2015 (R); Jacobs 2004 (S); Jungquist 2010 (T); Savard 2014 (U); Smith 2015 (V); Talbot 2014 (W); Kaku 2011 (X), Taylor 2015 (Y); Wu 2006 (Z); Bothelius 2013 (AA); Currie 2000 (BB); Espie 2007 (CC); Espie 2008 (DD); Irwin 2014 (EE); ; Lovato 2014 (FF); Morin 1993 (GG); Rybarczyk 2002 (HH); Rybarczyk, JCC 2005 (II); Savard 2005 (JJ); Lancee 2012 (KK); Ritterband 2009 (LL); Ritterband 2012 (MM); Van Straten 2014 (NN); Rybarczyk, BSM 2005 (OO); Morin 1999 (PP); Wagley 2013 (QQ); Fleming 2014 (RR); Bjorvatn 2011 (SS); Pigeon 2012 (UU); Dirksen 2007 (VV); Martinez 2014 (WW); Thorndike 2013 (XX); Blom 2016 (ZZ); Thiart 2015 (AAA); Miro 2011 (BBB); Sivertsen 2006 (CCC); Taylor 2017 (DDD); Drake 2019 (EEE); Sandlund 2017 (FFF), Espie 2019 (GGG); Bjorvatn 2018 (HHH); Mao 2017 (III); Bernstein 2017 (JJJ); Morin 2005 (KKK); Alessi 2016 (LLL); Horsch 2017 (MMM); Hagatun 2019 (NNN); McCrae 2019 (OOO)

| Outcomes<br>[Tool]                          | Quality of the<br>evidence<br>(GRADE) | Absolute Difference                                                                                                                                 | No of Participants<br>(studies)                                                                                                              |
|---------------------------------------------|---------------------------------------|-----------------------------------------------------------------------------------------------------------------------------------------------------|----------------------------------------------------------------------------------------------------------------------------------------------|
|                                             |                                       | CBTI vs Control                                                                                                                                     |                                                                                                                                              |
| Quality of sleep *<br>[Diary]               | ⊕⊕○○<br>LOW <sup>a,c</sup>            | The standardized mean difference in the CBTI group was 0.44 points higher <sup>2</sup> [0.28 to 0.61 points higher] compared to control             | 2012 patients<br>(19 RCT) A-M,DDD-FFF,KKK,MMM,OOO                                                                                            |
| Quality of sleep<br>[PSQI]                  | ⊕⊕⊕○<br>MODERATE <sup>c</sup>         | The standardized mean difference in the CBTI group was 0.66 points lower <sup>1</sup> [0.54 to 0.78 points lower] compared to control               | 1839 patients<br>(21 RCTs) A,D,E,J,K,P,R,X,BB,HH,II,NN,OO,QQ,SS,WW,BBB,III,KKK,LLL,MMM                                                       |
| Sleep latency *<br>[Diary]                  | ⊕⊕⊕○<br>MODERATE <sup>c</sup>         | The mean difference in the CBTI group was 12.68 minutes lower <sup>2</sup> [10.48 min to 14.88 mins lower] compared to control                      | 4295 patients<br>(47 RCTs) A,C-W,Y,Z,AA-NN, OO,DDD,EEE,FFF,KKK,LLL,MMM,NNN,OOO                                                               |
| Sleep latency<br>[PSG]                      | ⊕⊕⊕○<br>MODERATE <sup>c</sup>         | The mean difference in the CBTI group was 7.26 minutes lower <sup>2</sup> [17.41 min lower to 2.90 mins higher] compared to control                 | 351 patients<br>(6 RCTs) V,Z,EE,GG,JJ,OOO                                                                                                    |
| Wake after sleep onset *<br>[Diary]         | ⊕⊕○○<br>LOW <sup>a,c</sup>            | The mean difference in the CBTI group was 18.95 minutes lower <sup>2</sup> [15.43 to 22.46 minutes lower] compared to control                       | 3756 patients<br>(44 RCT) A,C,D,E,F,G,H,I,J,K,L,N, O,P,Q,R,T,U,V,W,Y,AA,BB,CC,DD,EE, FF,GG,HH,II,JK,KLL,MM,OO,PP,EEE,FFF,KKK,LLL,MMM,NNN,OOO |
| Wake after sleep onset<br>[Act]             | ⊕⊕⊕○<br>MODERATE <sup>c</sup>         | The mean difference in the CBTI group was 3.64 minutes lower <sup>2</sup> [8.34 mins lower to 1.07 min higher] compared to control                  | 955 patients<br>(11 RCT) D,E,N,P,V,W,CC,DD,FF,DDD,OOO                                                                                        |
| Wake after sleep onset<br>[PSG]             | ⊕⊕○○<br>LOW <sup>a,c</sup>            | The mean difference in the CBTI group was 16.64 minutes lower <sup>2</sup> [30.76 min lower to 2.51 mins higher] compared to control                | 392 patients<br>(7 RCT) V,W,EE,GG,JJ,PP,OOO                                                                                                  |
| Remission rate*<br>[ISI, Diary]             | ⊕⊕⊕○<br>MODERATE <sup>c</sup>         | The percentage of patients achieving "remission" in the CBTI group was 33% higher <sup>1</sup> [28% to 39% higher] compared to control              | 1775 patients<br>(25 RCT) A, B,D,J,L,P,R,S,U,V,W,Z,BB,CC,EE,FF,JJ,LLL,MM,PP,QQ,RR,EEE,FFF,MMM                                                |
| Responder rate*<br>[ISI, Diary]             | ⊕⊕⊕○<br>MODERATE <sup>c</sup>         | The percentage of patients considered "responders" in the CBTI group was 44% higher <sup>1</sup> [39% to 51% higher] compared to control            | 1152 patients<br>(17 RCT) B,C,D,I,J,K,L,N,O,R,AA, HH,II,OO,PP,FFF,MMM,NNN                                                                    |
| Beliefs and attitudes about sleep<br>[DBAS] | ⊕⊕⊕○<br>VERY LOW <sup>a,b,c</sup>     | The standardized mean difference in the CBTI group was 0.81 points lower <sup>1</sup> [0.35 to 1.26 points lower] compared to control               | 1580 patients<br>(16 RCT) D,H,I,J,L,M,U,HH,II,OO,SS,DDD,III, MMM,NNN,OOO                                                                     |
| Daytime fatigue<br>[MFI, FFS]               | ⊕⊕○○<br>LOW <sup>a,c</sup>            | The standardized mean difference in the CBTI group was 0.56 points lower <sup>1</sup> [0.25 to 0.87 points lower] compared to control               | 2250 patients<br>(10 RCT) D,I,J,FF,MM,UU,VV, WW,XX, GGG                                                                                      |
| Insomnia severity<br>[ISI]                  | ⊕⊕⊕○<br>MODERATE <sup>c</sup>         | The standardized mean difference in the CBTI group was 0.95 points lower <sup>1</sup> [0.78 to 1.13 points lower] compared to control               | 2827 patients<br>(30 RCT) B,C,D,I,J,K,L,R,T,U,V,W,Y,AA,FF,JJ,LL,UU,VV,ZZ,AAA,DDD,EEE,FFF,HHH,JJJ,KKK, LLL,MMM,NNN                            |
| Insomnia severity<br>[ISQ]                  | ⊕⊕○○<br>LOW <sup>a,c</sup>            | The standardized mean difference in the CBTI group was 0.32 points lower <sup>2</sup> [0.73 points lower to 0.09 points higher] compared to control | 200 patients<br>(3 RCT) N,O,P                                                                                                                |
| Nights using hypnotics<br>[Diary]           | ⊕⊕⊕○<br>MODERATE <sup>c</sup>         | The mean difference in the CBTI group was 1.14 nights per week lower <sup>2</sup> [0.66 to 1.63 nights per week lower] compared to control          | 858 patients<br>(5 RCT) M,HH,KK,OO,SS                                                                                                        |
| Number of nighttime awakenings<br>[Diary]   | ⊕⊕⊕○<br>MODERATE <sup>c</sup>         | The mean difference in the CBTI group was 0.36 points lower <sup>2</sup> [0.24 to 0.48 points lower] compared to control                            | 1683 patients<br>(19 RCT) A,C,D,G,H,I,J,Q,T,BB,FF, KK,LL,MM,NN,DDD,EEE,FFF,MMM                                                               |
| Number of nighttime awakenings<br>[Act]     | ⊕⊕○○<br>LOW <sup>a,c</sup>            | The mean difference in the CBTI group was 0.33 points lower <sup>2</sup> [0.19 to 0.48 points lower] compared to control                            | 100 patients<br>(1 RCT) <sup>DDD</sup>                                                                                                       |

|                                         |                                          |                                                                                                                                              |                                                                                                                                                                            |
|-----------------------------------------|------------------------------------------|----------------------------------------------------------------------------------------------------------------------------------------------|----------------------------------------------------------------------------------------------------------------------------------------------------------------------------|
| <b>Sleep efficiency</b><br>[Diary]      | ⊕⊕⊕○<br><b>MODERATE</b> <sup>c</sup>     | The mean difference in the CBTI group was 7.32% higher <sup>2</sup> [6.25% to 8.40% higher] compared to control                              | 4440 patients<br>(50 RCTs) <sup>A,C,D,E,F,G,H,I,J,K,L,M,N,O,P,Q,R,S,T,U,V,W,Y,Z,BB,CC,DD,EE,FF,GG,HH,II,JK,LL,MM,NN,OO,PP,UU,AAA,CCC,DDD,EEE,FFF,GGG,LLL,MMM,NNN,OOO</sup> |
| <b>Sleep efficiency</b><br>[Actigraphy] | ⊕⊕⊕○<br><b>MODERATE</b> <sup>c</sup>     | The mean difference in the CBTI group was 1.20% higher <sup>2</sup> [0.05% lower to 2.45% higher] compared to control                        | 923 patients<br>(11 RCTs) <sup>E,N,O,P,V,CC,DD,HH,DDD,LLL,OOO</sup>                                                                                                        |
| <b>Sleep efficiency</b><br>[PSG]        | ⊕⊕⊕○<br><b>MODERATE</b> <sup>c</sup>     | The mean difference in the CBTI group was 4.81% higher <sup>2</sup> [2.34% to 7.29% higher] compared to control                              | 413 patients<br>(8 RCTs) <sup>V,Z,EE,GG,JI,PP,CCC,OOO</sup>                                                                                                                |
| <b>Total wake time</b><br>[Diary]       | ⊕⊕○○<br><b>LOW</b> <sup>a,c</sup>        | The mean difference in the CBTI group was 39.60 minutes lower <sup>1</sup> [26.07 to 53.12 minutes lower] compared to control                | 1231 patients<br>(15 RCTs) <sup>B,C,D,F,H,N,O,R,U,GG,JI,UU,CCC,KKK,LLL</sup>                                                                                               |
| <b>Total wake time</b><br>[Act]         | ⊕⊕○○<br><b>LOW</b> <sup>a,c</sup>        | The mean difference in the CBTI group was 6.08 minutes lower <sup>2</sup> [16.42 minutes lower to 4.25 minutes higher] compared to control   | 134 patients<br>(3 RCTs) <sup>D,N,O</sup>                                                                                                                                  |
| <b>Total wake time</b><br>[PSG]         | ⊕⊕○○<br><b>LOW</b> <sup>a,c</sup>        | The mean difference in the CBTI group was 36.98 minutes lower <sup>1</sup> [79.33 minutes lower to 5.37 minutes higher] compared to control  | 110 patients<br>(3 RCTs) <sup>GG,JI,CCC</sup>                                                                                                                              |
| <b>Total sleep time</b><br>[Diary]      | ⊕⊕⊕○<br><b>MODERATE</b> <sup>c</sup>     | The mean difference in the CBTI group was 9.66 minutes higher <sup>2</sup> [4.86 minutes to 14.46 minutes higher] compared to control        | 3983 patients<br>(49 RCTs) <sup>A,B,C,D,E,F,G,H,I,J,K,L,M,N,O,P,Q,R,S,T,U,V,W,Y,Z,BB,CC,DD,EE,FF,GG,HH,II,JK,LL,MM,NN,OO,PP,UU,CCC,DDD,EEE,FFF,MMM,NNN,OOO</sup>           |
| <b>Total sleep time</b><br>[Actigraphy] | ⊕⊕○○<br><b>LOW</b> <sup>a,c</sup>        | The mean difference in the CBTI group was 19.15 minutes lower <sup>1</sup> [7.00 minutes to 31.29 minutes lower] compared to control         | 817 patients<br>(12 RCTs) <sup>D,E,N,O,P,V,W,DD,FF,HH,DDD,OOO</sup>                                                                                                        |
| <b>Total sleep time</b><br>[PSG]        | ⊕○○○<br><b>VERY LOW</b> <sup>a,b,c</sup> | The mean difference in the CBTI group was 10.59 minutes higher <sup>2</sup> [5.38 minutes lower to 26.56 minutes higher] compared to control | 455 patients<br>(9 RCTs) <sup>V,W,Z,EE,GG,JI,PP,CCC,OOO</sup>                                                                                                              |

\* Critical Outcome

<sup>a</sup> 95% CI crosses clinical significance threshold and/or <200 participants

<sup>b</sup> Inconsistent subgroup differences

<sup>c</sup> Risk of bias [no patient blinding, allocation concealment]

<sup>1</sup> Meets the clinical significance threshold

<sup>2</sup> Does not meet the clinical significance threshold

**Table S30.** Summary of findings table for CBT-I for the psychological and behavioral treatment of insomnia in adults with insomnia and no comorbidities

**References:** Edinger 2001 (A); Soeffing 2008(B); Taylor 2014 (C); Edinger 2009 (D); Edinger 2007 (E); Jacobs 2004 (F); Wu 2006 (G); Lovato 2014 (H); Morin 1993 (I); Ritterband 2009 (J); Morin 1999 (K); Strom 2004 (L); Blom 2016 (M); Hagatun 2019 (N), Bernstein 2017(O)

| Outcomes<br>[Tool]                          | Quality of the<br>evidence<br>(GRADE) | Absolute Difference<br><br>CBTI vs Control                                                                                                               | No of Participants<br>(studies)               |
|---------------------------------------------|---------------------------------------|----------------------------------------------------------------------------------------------------------------------------------------------------------|-----------------------------------------------|
| Quality of sleep *<br>[Diary]               | ⊕○○○<br><b>VERY LOW</b> a,b,c         | The standardized mean difference in the CBTI group was 0.77 points higher [0.52 points lower to 2.07 points higher] compared to control <sup>1</sup>     | 110 patients<br>(2 RCT) C,L                   |
| Quality of sleep *<br>[PSQI]                | ⊕⊕○○<br><b>LOW</b> a,b,c              | The standardized mean difference in the CBTI group was 1.08 points lower [2.17 points lower to 0.02 points higher] compared to control <sup>1</sup>      | 63 patients<br>(2 RCT) C,D                    |
| Sleep latency *<br>[Diary]                  | ⊕⊕⊕○<br><b>MODERATE</b> c             | The mean difference in the CBTI group was 12.82 minutes lower [7.56 min to 18.09 mins lower] compared to control <sup>2</sup>                            | 569 patients<br>(10 RCTs) C,D,E,F,G,H,I,J,L,N |
| Sleep latency<br>[PSG]                      | ⊕⊕○○<br><b>LOW</b> a,c                | The mean difference in the CBTI group was 17.11 minutes lower [43.65 min lower to 9.43 mins higher] compared to control <sup>2</sup>                     | 58 patients<br>(2 RCTs) G,I                   |
| Wake after sleep onset *<br>[Diary]         | ⊕⊕○○<br><b>LOW</b> a,c                | The mean difference in the CBTI group was 22.83 minutes lower [11.04 to 34.63 minutes lower] compared to control <sup>1</sup>                            | 540 patients<br>(9 RCTs) C,D,E,H,I,J,K,L,N    |
| Wake after sleep onset<br>[Act]             | ⊕⊕○○<br><b>LOW</b> a,b,c              | The mean difference in the CBTI group was 5.41 minutes lower [14.16 mins lower to 3.33 min higher] compared to control <sup>2</sup>                      | 181 patients<br>(3 RCT) C,D,H                 |
| Wake after sleep onset<br>[PSG]             | ⊕⊕○○<br><b>LOW</b> a,c                | The mean difference in the CBTI group was 24.51 minutes lower [7.51 min lower to 41.52 mins higher] compared to control <sup>1</sup>                     | 58 patients<br>(2 RCT) I,K                    |
| Remission rate*<br>[ISI, Diary]             | ⊕⊕⊕○<br><b>MODERATE</b> c             | The percentage of patients achieving "remission" in the CBTI group was 47% higher [33% to 61% higher] compared to control <sup>1</sup>                   | 278 patients<br>(6 RCT) C,D,F,G,H,J           |
| Responder rate*<br>[ISI, Diary]             | ⊕⊕⊕○<br><b>MODERATE</b> a             | The percentage of patients considered "responders" in the CBTI group was 44% higher [31% to 57% higher] compared to control <sup>1</sup>                 | 222 patients<br>(2 RCT) D,N                   |
| Beliefs and attitudes about sleep<br>[DBAS] | ⊕⊕○○<br><b>LOW</b> a,b,c              | The mean difference in the CBTI group was 1.21 points lower [0.65 to 1.76 points lower] compared to control <sup>1</sup>                                 | 251 patients<br>(3 RCT) C,L,N                 |
| Daytime fatigue<br>[MFI, FFS]               | ⊕⊕○○<br><b>LOW</b> a,c                | The std mean difference in the CBTI group was 0.7 points lower [0.32 to 1.08 points lower] compared to control <sup>1</sup>                              | 134 patients<br>(2 RCT) C,H                   |
| Insomnia severity<br>[ISI]                  | ⊕⊕○○<br><b>LOW</b> b,c                | The mean difference in the CBTI group was 1.25 points lower [0.95 to 1.55 points lower] compared to control <sup>1</sup>                                 | 541 patients<br>(6 RCT) C,H,J,M,N,O           |
| Insomnia severity<br>[ISQ]                  | ⊕⊕⊕○<br><b>MODERATE</b> a             | The mean difference in the CBTI group was 0.45 points lower [1.13 points lower to 0.23 points higher] compared to control <sup>2</sup>                   | 258 patients<br>(2 RCT) D,E                   |
| Nights using hypnotics<br>[Diary]           | ⊕⊕○○<br><b>LOW</b> a,b,c              | The mean difference in the CBTI group was 0.2 nights per week higher [2.33 nights lower to 2.73 nights per week higher] compared to control <sup>2</sup> | 24 patients<br>(1 RCT) I                      |
| Number of nighttime awakenings<br>[Diary]   | ⊕⊕○○<br><b>LOW</b> a,c                | The mean difference in the CBTI group was 0.31 points lower [0.07 to 0.55 points lower] compared to control <sup>2</sup>                                 | 259 patients<br>(4 RCTs) C,H,J,L              |
| Sleep efficiency<br>[Diary]                 | ⊕⊕○○<br><b>LOW</b> a,c                | The mean difference in the CBTI group was 8.75% higher [6.34 % to 11.15% higher] compared to control <sup>2</sup>                                        | 646 patients<br>(11 RCTs) C-L,N               |
| Sleep efficiency<br>[Actigraphy]            | ⊕⊕⊕○<br><b>MODERATE</b> a             | The mean difference in the CBTI group was 0.16% lower [3.25% lower to 2.94% higher] compared to control <sup>2</sup>                                     | 139 patients<br>(2 RCTs) D,E                  |
| Sleep efficiency<br>[PSG]                   | ⊕⊕○○<br><b>LOW</b> a,c                | The mean difference in the CBTI group was 6.27% higher [2.64% to 9.9% higher] compared to control <sup>2</sup>                                           | 94 patients<br>(3 RCTs) G,I,K                 |
| Total wake time<br>[Diary]                  | ⊕⊕○○<br><b>LOW</b> a,b,c              | The mean difference in the CBTI group was 17.49 minutes lower [2.87 to 32.1 minutes lower] compared to control <sup>2</sup>                              | 207 patients<br>(4 RCTs) C,E,I,L              |
| Total wake time<br>[Act]                    | ⊕⊕○○<br><b>LOW</b> a,b,c              | The mean difference in the CBTI group was 2.49 minutes lower [10.58 minutes lower to 5.61 minutes higher] compared to control <sup>2</sup>               | 96 patients<br>(2 RCTs) C,E                   |
| Total wake time<br>[PSG]                    | ⊕⊕○○<br><b>LOW</b> a,c                | The mean difference in the CBTI group was 37.92 minutes lower [6.57 minutes to 69.27 minutes lower] compared to control <sup>1</sup>                     | 23 patients<br>(1 RCT) I                      |
| Total sleep time<br>[Diary]                 | ⊕⊕○○<br><b>LOW</b> a,c                | The mean difference in the CBTI group was 10.06 minutes higher [1.88 minutes lower to 18.25 minutes higher] compared to control <sup>2</sup>             | 611 patients<br>(11 RCTs) C-L                 |
| Total sleep time<br>[Actigraphy]            | ⊕⊕○○<br><b>LOW</b> a,b,c              | The mean difference in the CBTI group was 23 minutes lower [51.11 minutes lower to 5.11 minutes higher] compared to control <sup>2</sup>                 | 241 patients<br>(4 RCTs) C,D,E,H              |

|                                  |                                         |                                                                                                                                               |                                              |
|----------------------------------|-----------------------------------------|-----------------------------------------------------------------------------------------------------------------------------------------------|----------------------------------------------|
| <b>Total sleep time</b><br>[PSG] | ⊕⊕○○<br><b>LOW</b> <small>a,b,c</small> | The mean difference in the CBTI group was 23.28 minutes higher [20.18 minutes lower to 66.93 minutes higher] compared to control <sup>1</sup> | 94 patients<br>(3 RCTs) <small>G,I,K</small> |
|----------------------------------|-----------------------------------------|-----------------------------------------------------------------------------------------------------------------------------------------------|----------------------------------------------|

\* Critical Outcome

a. 95% CI crosses clinical significance threshold and/or <200 participants

b. Inconsistent subgroup differences or overall inconsistency

c. Risk of bias [no patient blinding, allocation concealment]

<sup>1</sup> Meets the clinical significance threshold

<sup>2</sup> Does not meet the clinical significance threshold

**Table S31.** Summary of findings table for CBT-I for the psychological and behavioral treatment of insomnia in adults with insomnia and psychiatric comorbidities

**References:** Currie 2004 (A); Freeman 2015 (B); Harvey 2015 (C); Wagley 2013 (D); Jungquist 2010 (H); Talbot 2014 (I); Taylor 2015 (J); Jansson-Frojmark 2012 (K); Thorndike 2013 (L)

| Outcomes<br>[Tool]                        | Quality of the<br>evidence<br>(GRADE) | Absolute Difference                                                                                                                                     |                                                    |
|-------------------------------------------|---------------------------------------|---------------------------------------------------------------------------------------------------------------------------------------------------------|----------------------------------------------------|
|                                           |                                       | CBTI vs Control                                                                                                                                         |                                                    |
| Quality of sleep *<br>[Diary]             | ⊕⊕○○<br>LOW <sup>a,c</sup>            | The standardized mean difference in the CBTI group was 0.82 points higher [0.15 points to 1.48 points higher] compared to control <sup>1</sup>          | 47 patients<br>(1 RCT) <sup>A</sup>                |
| Quality of sleep<br>[PSQI]                | ⊕⊕⊕○<br>MODERATE <sup>c</sup>         | The standardized mean difference in the CBTI group was 0.78 points lower [0.55 points to 1 point lower] compared to control <sup>1</sup>                | 316 patients<br>(7 RCT) <sup>A-G</sup>             |
| Sleep latency *<br>[Diary]                | ⊕⊕○○<br>LOW <sup>a,c</sup>            | The mean difference in the CBTI group was 23.02 minutes lower [15.20 min to 30.84 mins lower] compared to control <sup>1</sup>                          | 339 patients<br>(8 RCT) <sup>A,C,E,F,G,H,I,J</sup> |
| Wake after sleep onset *<br>[Diary]       | ⊕⊕○○<br>LOW <sup>a,c</sup>            | The mean difference in the CBTI group was 24.57 minutes lower [10.63 to 38.50 minutes lower] compared to control <sup>1</sup>                           | 339 patients<br>(8 RCT) <sup>A,C,E,F,G,H,I,J</sup> |
| Wake after sleep onset<br>[Act]           | ⊕⊕⊕○<br>MODERATE <sup>a</sup>         | The mean difference in the CBTI group was 13.96 minutes lower [57.28 mins lower to 20.52 min higher] compared to control <sup>2</sup>                   | 45 patients<br>(1 RCT) <sup>I</sup>                |
| Wake after sleep onset<br>[PSG]           | ⊕⊕⊕○<br>MODERATE <sup>a</sup>         | The mean difference in the CBTI group was 18.38 minutes lower [60.15 mins lower to 32.23 min higher] compared to control <sup>2</sup>                   | 102 patients<br>(1 RCT) <sup>I</sup>               |
| Remission rate*<br>[ISI, Diary]           | ⊕⊕○○<br>LOW <sup>a,c</sup>            | The percentage of patients achieving "remission" in the CBTI group was 31% higher [13% to 48% higher] compared to control <sup>1</sup>                  | 196 patients<br>(5 RCT) <sup>A,C,D,H,I</sup>       |
| Responder rate*<br>[ISI, Diary]           | ⊕⊕○○<br>LOW <sup>a,c</sup>            | The percentage of patients considered "responders" in the CBTI group was 50% higher [38% to 62% higher] compared to control <sup>1</sup>                | 188 patients<br>(4 RCT) <sup>C,E,F,G</sup>         |
| Cognitive function<br>[DBAS]              | ⊕⊕○○<br>LOW <sup>a,c</sup>            | The mean difference in the CBTI group was 0.9 points lower [0.53 to 1.28 points lower] compared to control <sup>1</sup>                                 | 123 patients<br>(3 RCT) <sup>E,F,G</sup>           |
| Daytime fatigue<br>[MFI, FFS]             | ⊕⊕○○<br>LOW <sup>a,c</sup>            | The std mean difference in the CBTI group was 0.81 points lower [0.19 to 1.42 points lower] compared to control <sup>1</sup>                            | 44 patients<br>(1 RCT) <sup>L</sup>                |
| Insomnia severity<br>[ISI]                | ⊕⊕⊕○<br>MODERATE <sup>a</sup>         | The mean difference in the CBTI group was 1.61 points lower [1.16 to 2.05 points lower] compared to control <sup>1</sup>                                | 147 patients<br>(4 RCT) <sup>C,H,I,J</sup>         |
| Nights using hypnotics<br>[Diary]         | ⊕⊕○○<br>LOW <sup>a,b</sup>            | The mean difference in the CBTI group was 1.5 nights per week lower [3.53 nights lower to 0.53 nights per week higher] compared to control <sup>2</sup> | 25 patients<br>(1 RCT) <sup>G</sup>                |
| Number of nighttime awakenings<br>[Diary] | ⊕⊕○○<br>LOW <sup>a,c</sup>            | The mean difference in the CBTI group was 0.54 points lower 1.25 points lower to 0.59 points higher] compared to control <sup>1</sup>                   | 93 patients<br>(2 RCT) <sup>A,H</sup>              |
| Sleep efficiency<br>[Diary]               | ⊕⊕○○<br>LOW <sup>a,c</sup>            | The mean difference in the CBTI group was 9.52% higher [7.05 % to 11.99% higher] compared to control <sup>2</sup>                                       | 353 patients<br>(7 RCT) <sup>A,C,E,F,G,H,I,J</sup> |
| Sleep efficiency<br>[Actigraphy]          | ⊕⊕○○<br>LOW <sup>a,c</sup>            | The mean difference in the CBTI group was 0.80% lower [10.15% lower to 8.55% higher] compared to control <sup>2</sup>                                   | 24 patients<br>(1 RCT) <sup>E</sup>                |
| Total wake time<br>[Diary]                | ⊕⊕○○<br>LOW <sup>a</sup>              | The mean difference in the CBTI group was 25.94 minutes lower [53.98 mins lower to 2.10 minutes higher] compared to control <sup>2</sup>                | 58 patients<br>(1 RCT) <sup>C</sup>                |
| Total sleep time<br>[Diary]               | ⊕⊕○○<br>LOW <sup>a,b,c</sup>          | The mean difference in the CBTI group was 17.69 minutes higher [5.66 minutes lower to 41.04 minutes higher] compared to control <sup>2</sup>            | 371 patients<br>(9 RCT) <sup>A-C,E,F,G,H,I,J</sup> |
| Total sleep time<br>[Actigraphy]          | ⊕⊕⊕○<br>MODERATE <sup>a</sup>         | The mean difference in the CBTI group was 27.47 minutes lower [69.89 minutes lower to 14.94 minutes higher] compared to control <sup>2</sup>            | 103 patients<br>(3 RCT) <sup>B,E,I</sup>           |
| Total sleep time<br>[PSG]                 | ⊕⊕⊕○<br>MODERATE <sup>a</sup>         | The mean difference in the CBTI group was 33.60 minutes higher [17.27 minutes lower to 84.47 minutes higher] compared to control <sup>1</sup>           | 42 patients<br>(1 RCT) <sup>I</sup>                |

\* Critical Outcome

<sup>a</sup> 95% CI crosses clinical significance threshold and/or <200 participants

<sup>b</sup> Inconsistent subgroup differences or overall inconsistency

<sup>c</sup> Risk of bias [no patient blinding, allocation concealment]

<sup>1</sup> Meets the clinical significance threshold

<sup>2</sup> Does not meet the clinical significance threshold

**Table S32.** Summary of findings table for CBT-I for the psychological and behavioral treatment of insomnia in adults with insomnia and medical comorbidities

**References:** Epstein 2007 (A); Jansson-Frojmark 2012 (B); Edinger 2005 (C); Savard 2014 (D); Ritterband 2012 (E); Currie 2000 (F); Savard 2005 (G); Smith 2015 (H); Martinez 2014 (I); Miro 2011 (J); Hou 2014 (K); Pigeon 2012 (L); Dirksen 2007 (M); Chen 2008 (N); Mathews 2014 (O); McCrae 2019 (P); Rybarczyk 2005 (JCC) (Q); Rybarczyk 2005 (BSM) (R); Rybarczyk 2002 (S)

| Outcomes<br>[Tool]                          | Quality of the<br>evidence<br>(GRADE) | Absolute Difference                                                                                                                                  |                                                              |
|---------------------------------------------|---------------------------------------|------------------------------------------------------------------------------------------------------------------------------------------------------|--------------------------------------------------------------|
|                                             |                                       | CBTI vs Control                                                                                                                                      |                                                              |
| Quality of sleep *<br>[Diary]               | ⊕⊕○○<br>LOW <sup>a,b,c</sup>          | The standardized mean difference in the CBTI group was 0.14 points higher [0.60 points lower to 0.88 points higher] compared to control <sup>2</sup> | 178 patients<br>(3 RCT) <sup>A,B,P</sup>                     |
| Quality of sleep<br>[PSQI]                  | ⊕⊕⊕○<br>MODERATE <sup>c</sup>         | The standardized mean difference in the CBTI group was 0.88 points lower [0.61 points to 1.14 points lower] compared to control <sup>1</sup>         | 243 patients<br>(4 RCT) <sup>G,J,K,L</sup>                   |
| Sleep latency *<br>[Diary]                  | ⊕⊕⊕○<br>MODERATE <sup>c</sup>         | The mean difference in the CBTI group was 10.63 minutes lower [5.83 min to 15.44 mins lower] compared to control <sup>2</sup>                        | 220 patients<br>(11 RCTs) <sup>A,C,D,E,F,G,H,P,Q,R,S</sup>   |
| Sleep latency<br>[PSG]                      | ⊕⊕○○<br>LOW <sup>a,c</sup>            | The mean difference in the CBTI group was 2.89 minutes lower [20.31 min lower to 14.53 mins higher] compared to control <sup>2</sup>                 | 202 patients<br>(3 RCTs) <sup>H,I,P</sup>                    |
| Wake after sleep onset *<br>[Diary]         | ⊕⊕○○<br>LOW <sup>a,c</sup>            | The mean difference in the CBTI group was 19.60 minutes lower [11.90 to 27.31 minutes lower] compared to control <sup>2</sup>                        | 761 patients<br>(11 RCTs) <sup>A,C,D,E,F,G,H,I,P,Q,R,S</sup> |
| Wake after sleep onset<br>[Act]             | ⊕⊕○○<br>LOW <sup>a,b,c</sup>          | The mean difference in the CBTI group was 10.15 minutes lower [0.61 mins to 19.68 min lower] compared to control <sup>2</sup>                        | 261 patients<br>(4 RCT) <sup>C,D,I,P</sup>                   |
| Wake after sleep onset<br>[PSG]             | ⊕⊕○○<br>LOW <sup>a,b,c</sup>          | The mean difference in the CBTI group was 18.59 minutes lower [48.29mins lower to 11.11 mins higher] compared to control <sup>2</sup>                | 217 patients<br>(3 RCT) <sup>H,I,P</sup>                     |
| Remission rate*<br>[ISI, Diary]             | ⊕⊕⊕○<br>MODERATE <sup>c</sup>         | The percentage of patients achieving "remission" in the CBTI group was 30% higher [23% to 38% higher] compared to control <sup>1</sup>               | 465 patients<br>(6 RCT) <sup>B,E,F,G,H,I</sup>               |
| Responder rate*<br>[ISI, Diary]             | ⊕⊕○○<br>LOW <sup>a,c</sup>            | The percentage of patients considered "responders" in the CBTI group was 59% higher [43% to 75% higher] compared to control <sup>1</sup>             | 66 patients<br>(2 RCT) <sup>B,C</sup>                        |
| Beliefs and attitudes about sleep<br>[DBAS] | ⊕⊕○○<br>LOW <sup>a,c</sup>            | The mean difference in the CBTI group was 1.20 points lower [0.74 to 1.67 points lower] compared to control <sup>1</sup>                             | 489 patients<br>(5 RCT) <sup>D,P,Q,R,S</sup>                 |
| Daytime fatigue<br>[MFI, FSS]               | ⊕⊕⊕○<br>MODERATE <sup>c</sup>         | The std mean difference in the CBTI group was 0.53 points lower [0.22 to 0.84 points lower] compared to control <sup>1</sup>                         | 167 patients<br>(4 RCT) <sup>F,J,M,N</sup>                   |
| Insomnia severity<br>[ISI]                  | ⊕⊕○○<br>LOW <sup>a,c</sup>            | The mean difference in the CBTI group was 0.78 points lower [0.43 to 1.12 points lower] compared to control <sup>1</sup>                             | 401 patients<br>(5 RCT) <sup>B,E,I,M,N</sup>                 |
| Insomnia severity<br>[ISQ]                  | ⊕⊕○○<br>LOW <sup>a,b,c</sup>          | The mean difference in the CBTI group was 0.31 points lower [1.74 points lower to 1.11 points higher] compared to control <sup>2</sup>               | 42 patients<br>(1 RCT) <sup>C</sup>                          |
| Number of awakenings<br>[Diary]             | ⊕⊕○○<br>LOW <sup>a,b</sup>            | The mean difference in the CBTI group was 0.11 points lower [0.7 to 0.92 points lower] compared to control <sup>2</sup>                              | 83 patients<br>(2 RCTs) <sup>G,Q</sup>                       |
| Sleep efficiency<br>[Diary]                 | ⊕⊕⊕○<br>MODERATE <sup>c</sup>         | The mean difference in the CBTI group was 7.04% higher [5.02 % to 9.05% higher] compared to control <sup>2</sup>                                     | 771 patients<br>(12 RCTs) <sup>A,C,D,E,F,G,H,L,P,Q,R,S</sup> |
| Sleep efficiency<br>[Actigraphy]            | ⊕⊕○○<br>LOW <sup>a,c</sup>            | The mean difference in the CBTI group was 3.47% higher [1.55% to 5.39% higher] compared to control <sup>2</sup>                                      | 259 patients<br>(4 RCTs) <sup>A,C,H,P</sup>                  |
| Sleep efficiency<br>[PSG]                   | ⊕⊕○○<br>LOW <sup>a,c</sup>            | The mean difference in the CBTI group was 3.25% higher [0.12% lower to 6.38% higher] compared to control <sup>2</sup>                                | 217 patients<br>(3 RCTs) <sup>G,H,P</sup>                    |
| Total wake time<br>[Diary]                  | ⊕⊕○○<br>LOW <sup>a,b,c</sup>          | The mean difference in the CBTI group was 37.64 minutes lower [19.71 to 55.58 minutes lower] compared to control <sup>1</sup>                        | 351 patients<br>(5 RCTs) <sup>B,C,D,G,L</sup>                |
| Total wake time<br>[Act]                    | ⊕⊕○○<br>LOW <sup>a,c</sup>            | The mean difference in the CBTI group was 16.96 minutes lower [1.22 minutes to 32.71 minutes lower] compared to control <sup>2</sup>                 | 38 patients<br>(1 RCTs) <sup>C</sup>                         |
| Total wake time<br>[PSG]                    | ⊕⊕○○<br>LOW <sup>a,c</sup>            | The mean difference in the CBTI group was 1.37 minutes lower [23.05 minutes to 20.31 minutes higher] compared to control <sup>2</sup>                | 57 patients<br>(1 RCT) <sup>G</sup>                          |
| Total sleep time<br>[Diary]                 | ⊕⊕○○<br>LOW <sup>a,c</sup>            | The mean difference in the CBTI group was 4.05 minutes lower [13.27 minutes lower to 5.17 minutes higher] compared to control <sup>2</sup>           | 801 patients<br>(13 RCTs) <sup>A-H,L,P,Q,R,S</sup>           |
| Total sleep time<br>[Actigraphy]            | ⊕⊕○○<br>LOW <sup>a,c</sup>            | The mean difference in the CBTI group was 11.50 minutes lower [34.08 minutes lower to 11.08 minutes higher] compared to control <sup>2</sup>         | 281 patients<br>(5 RCTs) <sup>A,C,H,P,S</sup>                |
| Total sleep time<br>[PSG]                   | ⊕⊕○○<br>LOW <sup>a,c</sup>            | The mean difference in the CBTI group was 11.01 minutes lower [30.18 minutes lower to 8.17 minutes higher] compared to control <sup>2</sup>          | 217 patients<br>(3 RCTs) <sup>G,H,P</sup>                    |

---

\* Critical Outcome

- a. 95% CI crosses clinical significance threshold and/or <200 participants
- b. Inconsistent subgroup differences or overall inconsistency
- c. Risk of bias [no patient blinding, allocation concealment]

<sup>1</sup> Meets the clinical significance threshold

<sup>2</sup> Does not meet the clinical significance threshold

---

# Brief Therapies for Insomnia (BTI)

## Quality of sleep: Diary

**Figure S77.** Dairy-determined quality of sleep, post treatment differences, BTI vs. control

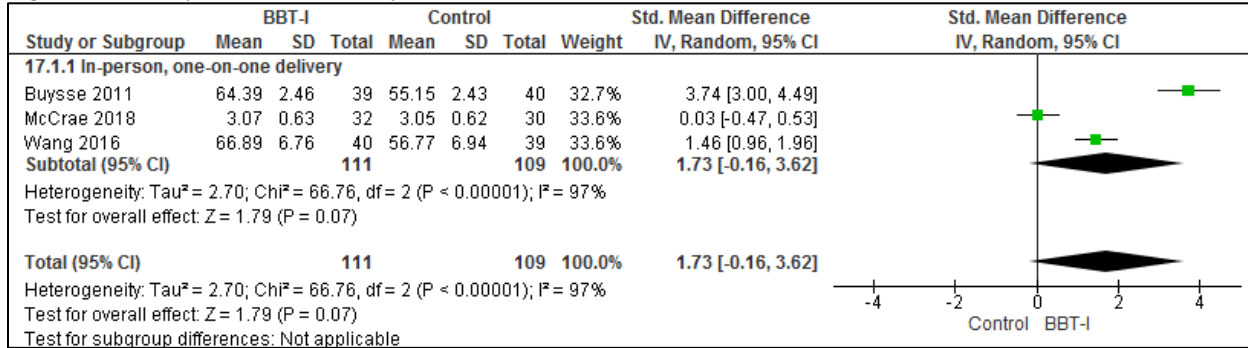

## Quality of sleep: PSQI

**Figure S78.** PSQI-determined quality of sleep, post treatment differences, BTI vs. control

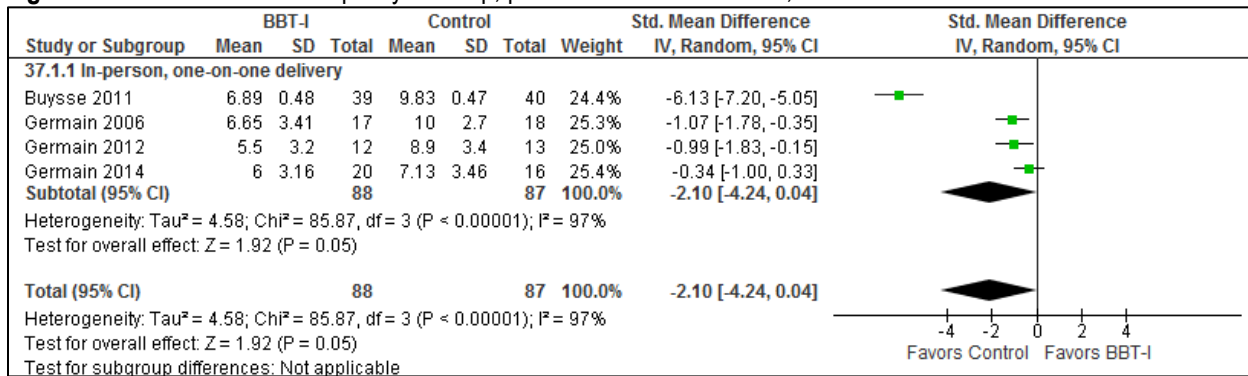

## Sleep latency: Diary

**Figure S79.** Dairy-determined sleep latency (minutes), post treatment differences, BTI vs. control

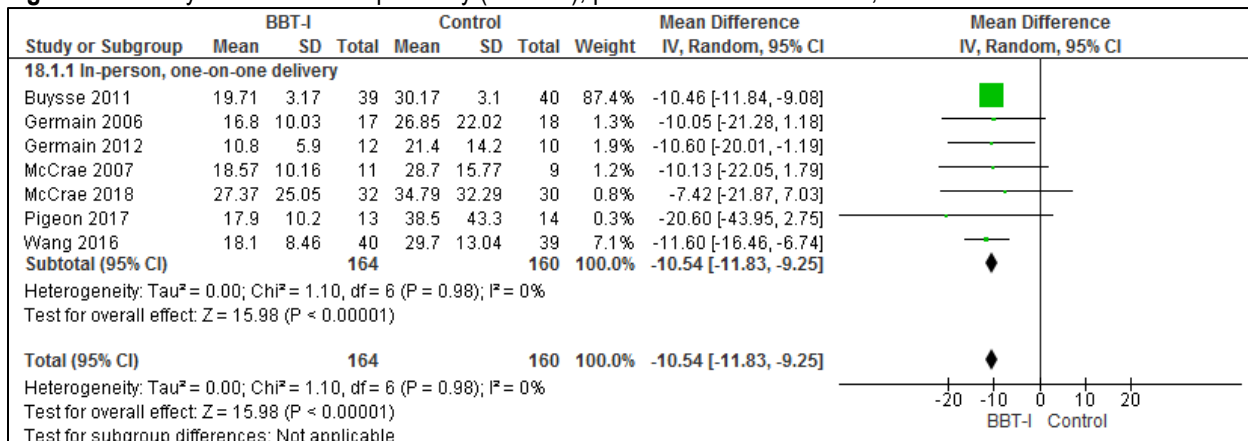



## Sleep latency: PSG

**Table S33.** PSG-determined sleep latency (minutes), post treatment differences, BTI vs. control

| Study        | Delivery method                | BTI   |      |       | Control |      |       | Mean Difference, [95% CI] |
|--------------|--------------------------------|-------|------|-------|---------|------|-------|---------------------------|
|              |                                | Mean  | SD   | Total | Mean    | SD   | Total |                           |
| Buysse 2011  | In-person, one-on-one delivery | 29.21 | 4.81 | 39    | 25.59   | 4.74 | 40    | 3.62 [1.51, 5.73]         |
| Germain 2012 | In-person, one-on-one delivery | 18.2  | 11.9 | 12    | 14.7    | 8.7  | 12    | 3.50 [-4.84, 11.84]       |

## Wake after sleep onset: Diary

**Figure S80.** Diary-determined WASO (minutes), post treatment differences, BTI vs. control

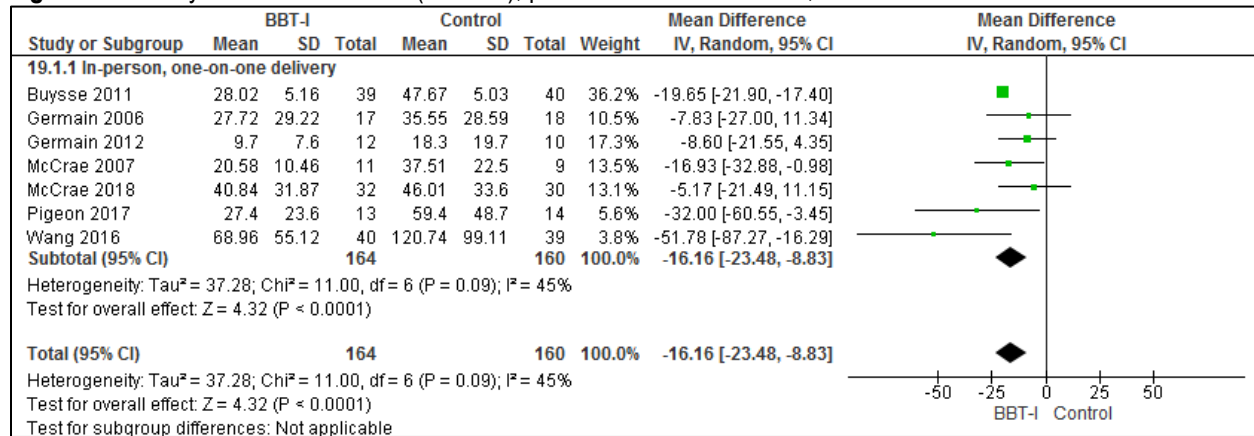

## Wake after sleep onset

**Table S34.** Actigraphy-determined WASO (minutes), post treatment differences, BTI vs. control

| Study       | Delivery method                | BTI   |       |       | Control |      |       | Mean Difference, [95% CI] |
|-------------|--------------------------------|-------|-------|-------|---------|------|-------|---------------------------|
|             |                                | Mean  | SD    | Total | Mean    | SD   | Total |                           |
| Buysse 2011 | In-person, one-on-one delivery | 46.62 | 3.99  | 39    | 55.38   | 3.97 | 40    | -8.76 [-10.52, -7.00]     |
| McCrae 2018 | In-person, one-on-one delivery | 32.05 | 17.06 | 32    | 41      | 15.1 | 30    | -8.95 [-16.96, -0.94]     |

**Table S35.** PSG-determined WASO (minutes), post treatment differences, BTI vs. control

| Study        | Delivery method                | BTI   |      |       | Control |      |       | Mean Difference, [95% CI] |
|--------------|--------------------------------|-------|------|-------|---------|------|-------|---------------------------|
|              |                                | Mean  | SD   | Total | Mean    | SD   | Total |                           |
| Buysse 2011  | In-person, one-on-one delivery | 85.26 | 8.49 | 40    | 92.46   | 8.38 | 40    | -7.20 [-10.92, -3.48]     |
| Germain 2012 | In-person, one-on-one delivery | 45.1  | 19.7 | 12    | 33      | 24.5 | 12    | 12.10 [-5.69, 29.89]      |

### Remission rate

**Figure S81.** Remission rate, post treatment differences, BTI vs. control

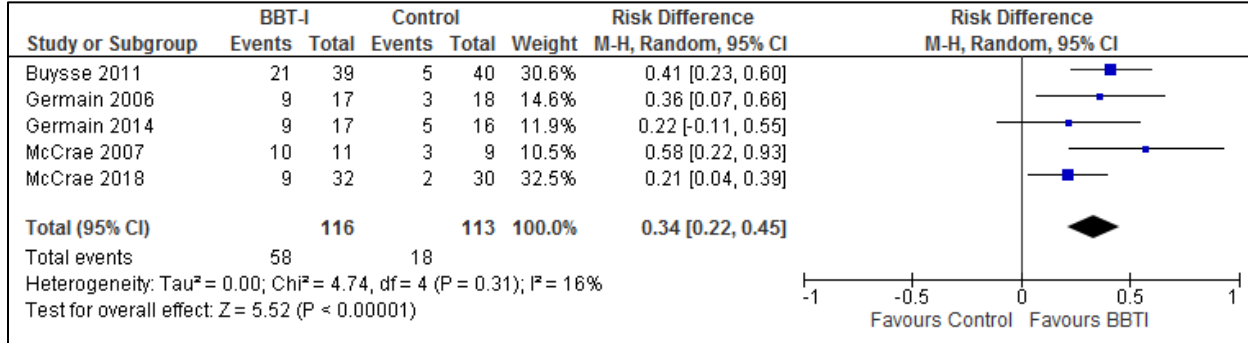

### Responder rate

**Table S36.** Responder rate, post treatment differences, BTI vs. control

| Study        | Delivery method                 | BTI    |       | Control |       | Risk Difference [95% CI] |
|--------------|---------------------------------|--------|-------|---------|-------|--------------------------|
|              |                                 | Events | Total | Events  | Total |                          |
| Germain 2014 | In-person, one-on-one, delivery | 13     | 17    | 8       | 16    | 0.26[-0.05, 0.58]        |
| Pigeon 2017  | In-person, one-on-one, delivery | 4      | 11    | 2       | 13    | 0.21[-0.14, 0.56]        |

### Beliefs and attitudes about sleep

**Table S37.** Dysfunctional Beliefs and Attitudes about Sleep (DBAS)-determined beliefs and attitudes about sleep, post treatment differences, BTI vs. control

| Study     | Delivery method                | BTI  |      |       | Control |      |       | Std. Mean Difference, [95% CI] |
|-----------|--------------------------------|------|------|-------|---------|------|-------|--------------------------------|
|           |                                | Mean | SD   | Total | Mean    | SD   | Total |                                |
| Wang 2016 | In-person, one-on-one delivery | 4.88 | 0.89 | 40    | 5.09    | 0.99 | 39    | -0.22 [-0.66, 0.22]            |

### Insomnia severity

**Figure S82.** ISI-determined insomnia severity, post treatment differences, BTI vs. control

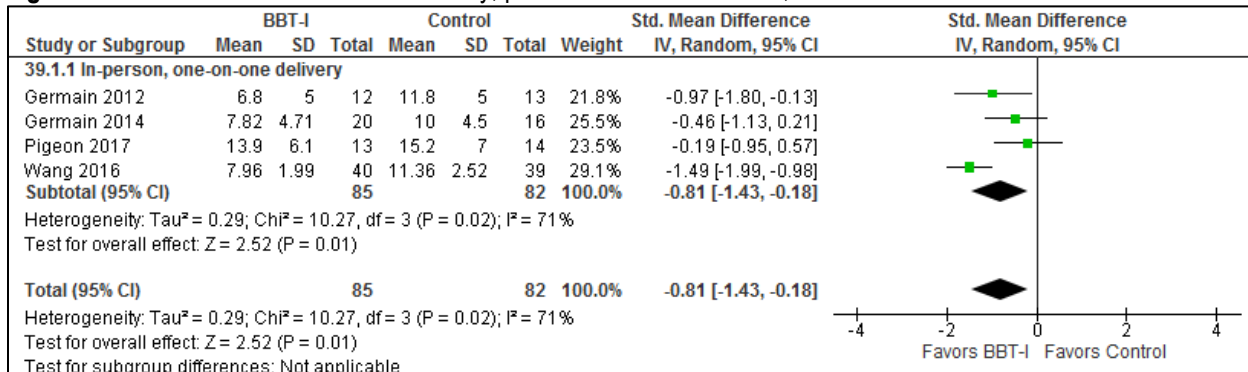

## Number of awakenings

**Table S38.** Diary-determined number of awakenings (nights/week), post treatment differences, BTI vs. control

| Study       | Delivery method                | BTI  |      |       | Control |      |       | Mean Difference, [95% CI] |
|-------------|--------------------------------|------|------|-------|---------|------|-------|---------------------------|
|             |                                | Mean | SD   | Total | Mean    | SD   | Total |                           |
| McCrae 2007 | In-person, one-on-one delivery | 1.64 | 0.56 | 11    | 1.86    | 0.47 | 9     | -0.22 [-0.67, 0.23]       |
| Pigeon 2017 | In-person, one-on-one delivery | 1.5  | 1    | 13    | 2       | 1.2  | 14    | -0.50 [-1.33, 0.33]       |

## Sleep efficiency

**Figure S83.** Diary-determined sleep efficiency (%), post treatment differences, BTI vs. control

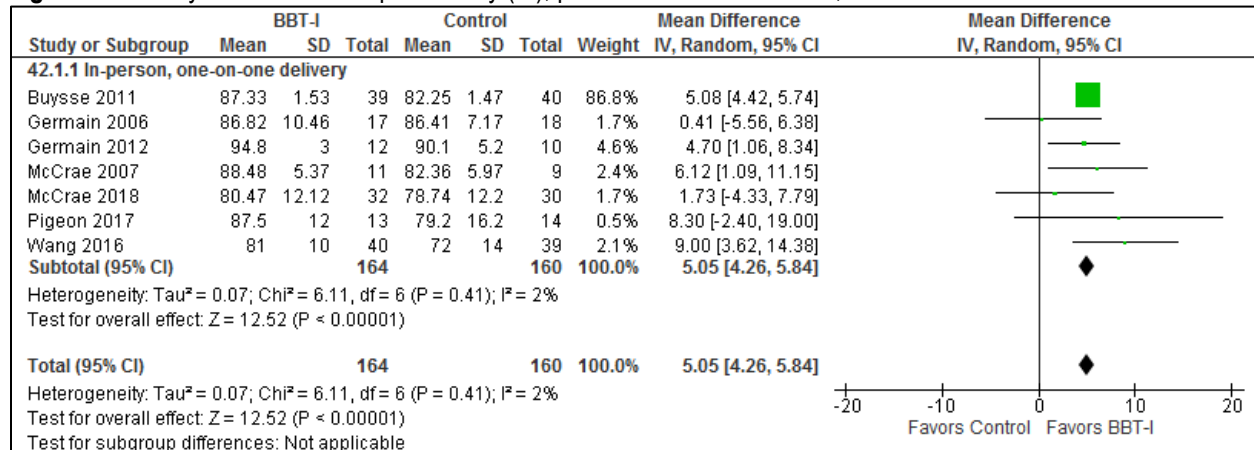

**Table S39.** Actigraphy-determined sleep efficiency (%), post treatment differences, BTI vs. control

| Study        | Delivery method                | BTI   |      |       | Control |      |       | Mean Difference, [95% CI] |
|--------------|--------------------------------|-------|------|-------|---------|------|-------|---------------------------|
|              |                                | Mean  | SD   | Total | Mean    | SD   | Total |                           |
| Buyssse 2011 | In-person, one-on-one delivery | 82.82 | 1.16 | 39    | 79.99   | 1.15 | 40    | 2.83 [2.32, 3.34]         |
| McCrae 2018  | In-person, one-on-one delivery | 86.39 | 7.36 | 32    | 82.58   | 7.05 | 30    | -3.81 [0.22, 7.40]        |

**Table S40.** PSG-determined sleep efficiency (%), post treatment differences, BTI vs. control

| Study        | Delivery method                | BTI   |      |       | Control |      |       | Mean Difference, [95% CI] |
|--------------|--------------------------------|-------|------|-------|---------|------|-------|---------------------------|
|              |                                | Mean  | SD   | Total | Mean    | SD   | Total |                           |
| Buyssse 2011 | In-person, one-on-one delivery | 74.86 | 1.67 | 39    | 74.16   | 1.64 | 40    | 0.70 [-0.03, 1.43]        |
| Germain 2012 | In-person, one-on-one delivery | 84.5  | 6.5  | 12    | 89.1    | 5    | 12    | -4.60 [-9.24, 0.04]       |

Total sleep time

Figure S84. Diary-determined total sleep time (minutes), post treatment differences, BTI vs. control

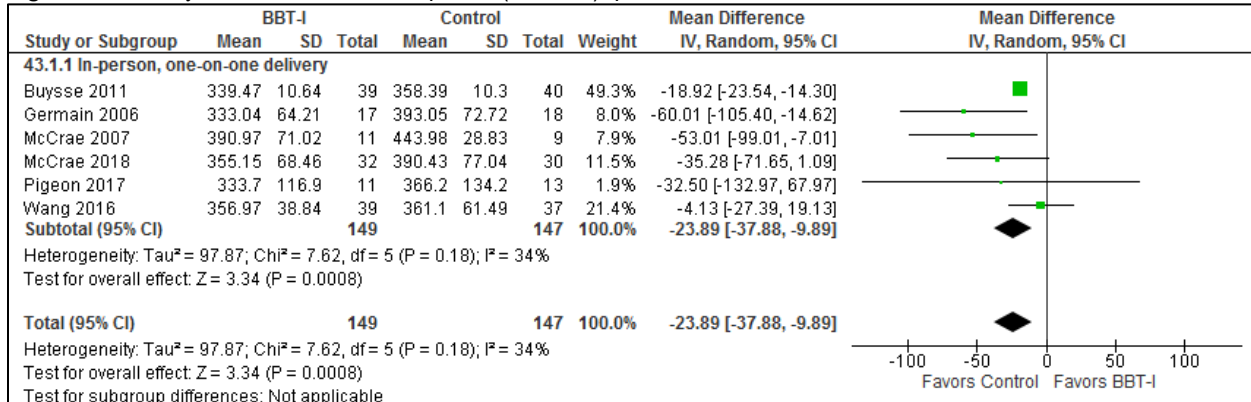

Table S41. Actigraphy-determined total sleep time (minutes), post treatment differences, BTI vs. control

| Study       | Delivery method                | BTI    |       |       | Control |       |       | Mean Difference, [95% CI] |
|-------------|--------------------------------|--------|-------|-------|---------|-------|-------|---------------------------|
|             |                                | Mean   | SD    | Total | Mean    | SD    | Total |                           |
| Buyse 2011  | In-person, one-on-one delivery | 338.16 | 8.14  | 39    | 370.44  | 8.02  | 40    | -32.28 [-35.84, -28.72]   |
| McCrae 2018 | In-person, one-on-one delivery | 371.79 | 47.69 | 32    | 375.75  | 63.46 | 30    | -3.96 [-32.04, 24.12]     |

Table S42. PSG-determined total sleep time (minutes), post treatment differences, BTI vs. control

| Study        | Delivery method                | BTI    |      |       | Control |      |       | Mean Difference, [95% CI] |
|--------------|--------------------------------|--------|------|-------|---------|------|-------|---------------------------|
|              |                                | Mean   | SD   | Total | Mean    | SD   | Total |                           |
| Buyse 2011   | In-person, one-on-one delivery | 324.82 | 9.43 | 39    | 333.31  | 9.31 | 40    | -8.49 [-12.62, -4.36]     |
| Germain 2012 | In-person, one-on-one delivery | 355.6  | 64.9 | 12    | 389.7   | 40   | 12    | -34.10 [-77.23, 9.03]     |

**Table S43.** Summary of findings table for BTIs for the psychological and behavioral treatment of insomnia in adults

**References:** Buysse 2011 (A); Wang 2016 (B); Germain 2006 (C); Germain 2012 (D); Germain 2014 (E); McCrae 2007 (F); Pigeon 2017 (G); McCrae 2018 (H); Pigeon 2017 (I)

| Outcomes<br>[Tool]                          | Quality of the evidence<br>(GRADE)   | Absolute Difference                                                                                                                                  |                                                  |
|---------------------------------------------|--------------------------------------|------------------------------------------------------------------------------------------------------------------------------------------------------|--------------------------------------------------|
|                                             |                                      | BTIs vs Control                                                                                                                                      | No of Participants (studies)                     |
| Quality of sleep*<br>[Diary]                | ⊕⊕○○<br><b>LOW</b> <sup>a,b,c</sup>  | The standardized mean difference in the BTII group was 1.73 points higher <sup>1</sup> [0.16 points lower to 3.62 points higher] compared to control | 220 patients<br>(3 RCT) <sup>A,B,H</sup>         |
| Quality of sleep<br>[PSQI]                  | ⊕⊕○○<br><b>LOW</b> <sup>a,c</sup>    | The standardized mean difference in the BTII group was 0.76 points lower <sup>2</sup> [0.28 points to 1.25 points lower] compared to control         | 96 patients<br>(3 RCT) <sup>C,D,E</sup>          |
| Sleep latency*<br>[Diary]                   | ⊕⊕⊕○<br><b>MODERATE</b> <sup>c</sup> | The mean difference in the BTII group was 10.54 minutes lower <sup>2</sup> [9.25 mins to 11.83 mins lower] compared to control                       | 324 patients<br>(7 RCT) <sup>A,B,C,D,F,G,H</sup> |
| Sleep latency<br>[PSG]                      | ⊕⊕⊕○<br><b>MODERATE</b> <sup>a</sup> | The mean difference in the BTII group ranged from 3.50 to 3.62 minutes higher <sup>2</sup> compared to control                                       | 103 patients<br>(2 RCT) <sup>A,D</sup>           |
| Wake after sleep onset*<br>[Diary]          | ⊕⊕○○<br><b>LOW</b> <sup>a,b</sup>    | The mean difference in the BTII group was 16.16 minutes lower <sup>2</sup> [8.83 mins to 23.48 mins lower] compared to control                       | 324 patients<br>(7 RCT) <sup>A,B,C,D,F,G,H</sup> |
| Wake after sleep onset<br>[Actigraphy]      | ⊕⊕⊕○<br><b>MODERATE</b> <sup>a</sup> | The mean difference in the BTII group ranged from 8.76 to 8.95 minutes lower <sup>2</sup> compared to control                                        | 141 patients<br>(2 RCT) <sup>A,H</sup>           |
| Wake after sleep onset<br>[PSG]             | ⊕⊕○○<br><b>LOW</b> <sup>a,c</sup>    | The mean difference in the BTII group ranged from 7.20 minutes lower to 12.10 minutes higher <sup>2</sup> compared to control                        | 103 patients<br>(2 RCT) <sup>A,D</sup>           |
| Remission rate*<br>[Diary/ISI]              | ⊕⊕⊕○<br><b>MODERATE</b> <sup>a</sup> | The percentage of patients achieving "remission" in the BTII group was 34% higher <sup>1</sup> [22% lower to 45% higher] compared to control         | 229 patients<br>(5 RCT) <sup>A,C,E,F,H</sup>     |
| Responder rate*<br>[Diary/ISI]              | ⊕⊕⊕○<br><b>MODERATE</b> <sup>a</sup> | The percentage of patients considered "responders" in the BTII group ranged from 21% to 26% higher <sup>1</sup> compared to control                  | 57 patients<br>(2 RCT) <sup>E,G</sup>            |
| Beliefs and attitudes about sleep<br>[DBAS] | ⊕⊕○○<br><b>LOW</b> <sup>a,b</sup>    | The mean difference in the BTII group was 0.22 points lower <sup>2</sup> [0.66 points lower to 0.22 points higher] compared to control               | 79 patients<br>(1 RCT) <sup>B</sup>              |
| Insomnia severity<br>[ISI]                  | ⊕⊕○○<br><b>LOW</b> <sup>a,b</sup>    | The mean difference in the BTII group was 0.81 point lower <sup>1</sup> [0.18 to 1.43 points lower] compared to control                              | 167 patients<br>(4 RCT) <sup>B,D,E,I</sup>       |
| Number of awakenings<br>[Diary]             | ⊕⊕⊕○<br><b>MODERATE</b> <sup>a</sup> | The mean difference in the BTII group ranged from 0.22 to 0.50 fewer awakenings compared to control                                                  | 47 patients<br>(2 RCT) <sup>F,I</sup>            |
| Sleep efficiency<br>[Diary]                 | ⊕⊕⊕○<br><b>MODERATE</b> <sup>b</sup> | The mean difference in the BTII group was 5.05% higher <sup>2</sup> [4.26% to 5.84% higher] compared to control                                      | 304 patients<br>(7 RCT) <sup>A,B,C,D,F,G,H</sup> |
| Sleep efficiency<br>[Actigraphy]            | ⊕⊕⊕○<br><b>MODERATE</b> <sup>a</sup> | The mean difference in the BTII group I ranged from 3.81% lower to 2.83% higher <sup>2</sup> compared to control                                     | 141 patients<br>(2 RCT) <sup>A,H</sup>           |
| Sleep efficiency<br>[PSG]                   | ⊕⊕○○<br><b>LOW</b> <sup>a,c</sup>    | The mean difference in the BTII group ranged from 4.60% lower <sup>2</sup> to 0.70% higher compared to control                                       | 103 patients<br>(2 RCT) <sup>A,D</sup>           |
| Total sleep time<br>[Diary]                 | ⊕⊕⊕○<br><b>MODERATE</b> <sup>a</sup> | The mean difference in the BTII group was 23.89 minutes lower <sup>2</sup> [9.89 mins to 37.88 mins lower] compared to control                       | 296 patients<br>(6 RCT) <sup>A,B,C,F,H,I</sup>   |
| Total sleep time<br>[Actigraphy]            | ⊕⊕⊕○<br><b>MODERATE</b> <sup>a</sup> | The mean difference in the BTII ranged from 3.96 minutes to 32.28 minutes lower <sup>2</sup> compared to control                                     | 141 patients<br>(2 RCT) <sup>A,H</sup>           |
| Total sleep time<br>[PSG]                   | ⊕⊕⊕○<br><b>MODERATE</b> <sup>a</sup> | The mean difference in the BTII group ranged from 8.49 minutes to 34.10 minutes lower <sup>2</sup> compared to control                               | 103 patients<br>(2 RCT) <sup>A,D</sup>           |

\* Critical Outcome

<sup>a</sup> 95% CI crosses clinical significance threshold and/or <200 participants

<sup>b</sup> Risk of bias [no patient blinding, allocation concealment]

<sup>c</sup> Inconsistent results

<sup>1</sup> Meets the clinical significance threshold

<sup>2</sup> Does not meet the clinical significance threshold

# Stimulus Control

## Quality of sleep

**Table S44.** Diary-determined quality of sleep, post treatment differences, stimulus control vs. control

| Study       | Delivery method                | Stimulus Control |      |       | Control |      |       | Std. Mean Difference, [95% CI] |
|-------------|--------------------------------|------------------|------|-------|---------|------|-------|--------------------------------|
|             |                                | Mean             | SD   | Total | Mean    | SD   | Total |                                |
| Sidani 2019 | In-person, one-on-one delivery | 3.02             | 0.55 | 95    | 2.94    | 0.50 | 78    | -0.15[-0.15, 0.45]             |

**Table S45.** PSQI-determined quality of sleep, post treatment differences, stimulus control vs. control

| Study       | Delivery method                | Stimulus Control |      |       | Control |      |       | Std. Mean Difference, [95% CI] |
|-------------|--------------------------------|------------------|------|-------|---------|------|-------|--------------------------------|
|             |                                | Mean             | SD   | Total | Mean    | SD   | Total |                                |
| Harris 2012 | In-person, one-on-one delivery | 8.73             | 2.71 | 17    | 11.11   | 2.72 | 19    | -0.86 [-1.54, -0.17]           |

## Sleep latency

**Figure S85.** Diary-determined sleep latency (minutes), post treatment differences, stimulus control vs. control

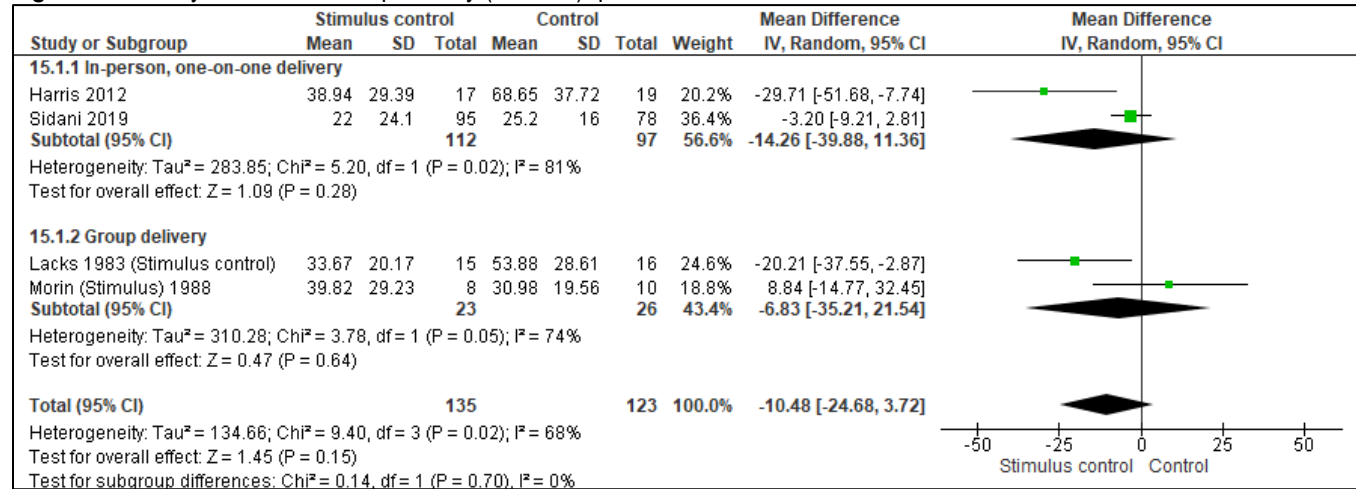

## Wake after sleep onset

**Figure S86.** Diary-determined WASO (minutes), post treatment differences, stimulus control vs. control

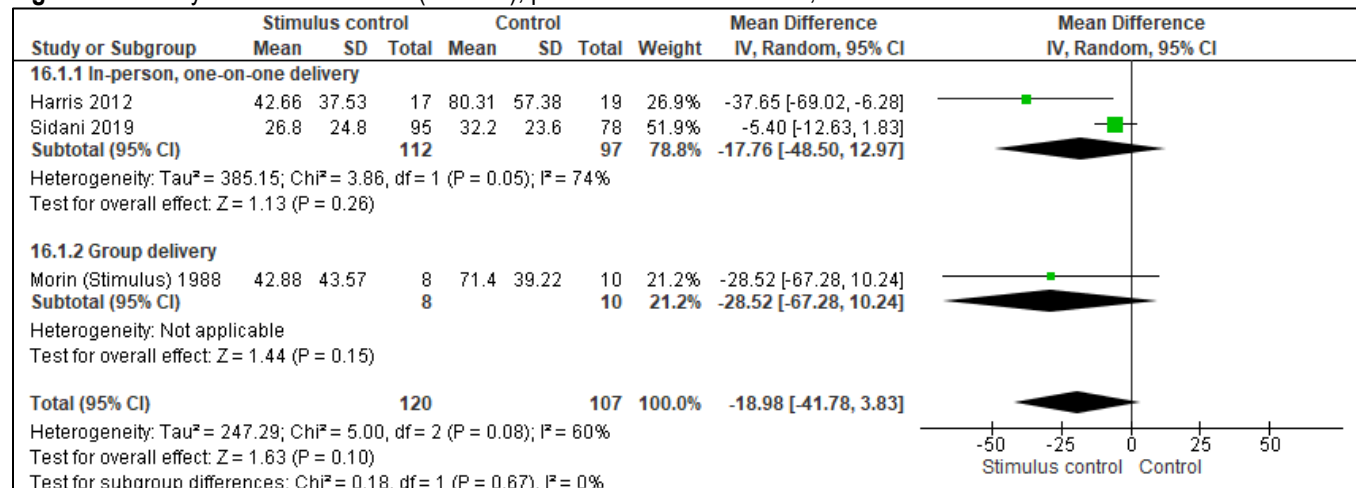

### Wake after sleep onset

**Table S46.** Actigraphy-determined WASO (minutes), post treatment differences, stimulus control vs. control

| Study       | Delivery method                | Stimulus Control |    |       | Control |       |       | Mean Difference, [95% CI] |
|-------------|--------------------------------|------------------|----|-------|---------|-------|-------|---------------------------|
|             |                                | Mean             | SD | Total | Mean    | SD    | Total |                           |
| Harris 2012 | In-person, one-on-one delivery | 92.47            | 44 | 17    | 100.19  | 46.49 | 19    | -7.72 [-37.29, 21.85]     |

### Remission rate

**Table S47.** ISI/Diary determined remission rate, post treatment differences, stimulus control vs. control

| Study       | Delivery method     | Stimulus Control |       | Control |       | Risk Difference [95% CI] |
|-------------|---------------------|------------------|-------|---------|-------|--------------------------|
|             |                     | Events           | Total | Events  | Total |                          |
| Sidani 2019 | In-person, delivery | 31               | 95    | 11      | 78    | 0.19 [0.06, 0.31]        |

### Insomnia severity

**Table S48.** ISI-determined insomnia severity, post treatment differences, stimulus control vs. control

| Study       | Delivery method                | Stimulus Control |      |       | Control |      |       | Std. Mean Difference, [95% CI] |
|-------------|--------------------------------|------------------|------|-------|---------|------|-------|--------------------------------|
|             |                                | Mean             | SD   | Total | Mean    | SD   | Total |                                |
| Sidani 2019 | In-person, one-on-one delivery | 10.33            | 4.71 | 95    | 13.04   | 4.76 | 78    | -0.57[-0.88, -0.26]            |

### Number of nighttime awakenings

**Table S49.** Diary-determined number of awakenings (no./nights), post treatment differences, stimulus control vs. control

| Study       | Delivery method    | Stimulus Control |      |       | Control |      |       | Mean Difference, [95% CI] |
|-------------|--------------------|------------------|------|-------|---------|------|-------|---------------------------|
|             |                    | Mean             | SD   | Total | Mean    | SD   | Total |                           |
| Morin 1988  | Group delivery     | 1.92             | 1.13 | 8     | 2.61    | 1.07 | 10    | -0.69 [-1.72, 0.34]       |
| Sidani 2019 | In-person delivery | 1.3              | 1.0  | 95    | 2.0     | 2.4  | 78    | -0.70 [-1.27, -0.13]      |

### Sleep efficiency

**Table S50.** Diary-determined total sleep efficiency (%), post treatment differences, stimulus control vs. control

| Study       | Delivery method                | Stimulus Control |       |       | Control |       |       | Mean Difference, [95% CI] |
|-------------|--------------------------------|------------------|-------|-------|---------|-------|-------|---------------------------|
|             |                                | Mean             | SD    | Total | Mean    | SD    | Total |                           |
| Harris 2012 | In-person, one-on-one delivery | 81.57            | 7.34  | 17    | 68.24   | 14.14 | 19    | 13.33 [6.08, 20.58]       |
| Sidani 2019 | In-person, one-on-one delivery | 84.01            | 12.55 | 95    | 80.93   | 7.69  | 78    | 3.08 [0.03, 6.13]         |

**Table S51.** Actigraphy-determined total sleep efficiency (%), post treatment differences, stimulus control vs. control

| Study       | Delivery method                | Stimulus Control |      |       | Control |       |       | Mean Difference, [95% CI] |
|-------------|--------------------------------|------------------|------|-------|---------|-------|-------|---------------------------|
|             |                                | Mean             | SD   | Total | Mean    | SD    | Total |                           |
| Harris 2012 | In-person, one-on-one delivery | 75.61            | 9.82 | 17    | 71.92   | 11.91 | 19    | 3.69 [-3.41, 10.79]       |

## Total sleep time

**Figure S87.** Diary-determined total sleep time (minutes), post treatment differences, stimulus control vs. control

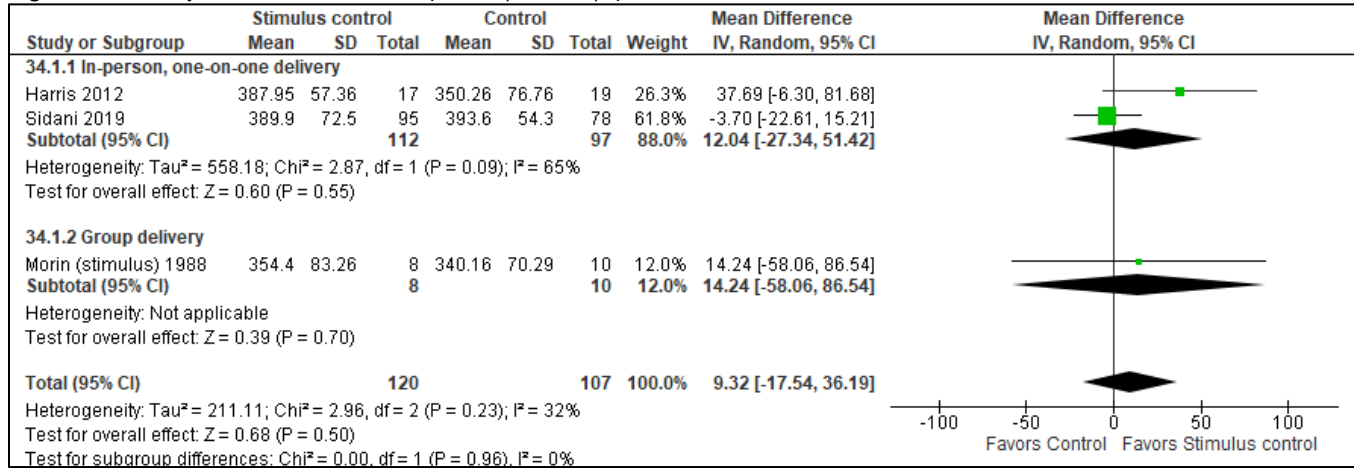

**Table S52.** Actigraphy-determined total sleep time (minutes), post treatment differences, stimulus control vs. control

| Study       | Delivery method                | Stimulus Control |       |       | Control |       |       | Mean Difference, [95% CI] |
|-------------|--------------------------------|------------------|-------|-------|---------|-------|-------|---------------------------|
|             |                                | Mean             | SD    | Total | Mean    | SD    | Total |                           |
| Harris 2012 | In-person, one-on-one delivery | 365.12           | 65.98 | 17    | 368.5   | 72.74 | 19    | -3.38 [-48.70, 41.94]     |



**Table S53.** Summary of findings table for stimulus control for the psychological and behavioral treatment of insomnia in adults

References: Harris 2012 (A); Lacks 1983 (B); Morin 1988 (C); Sidani 2019 (D)

| Outcomes<br>[Tool]                     | Quality of the<br>evidence<br>(GRADE) | Absolute Difference                                                                                                                                             |  |
|----------------------------------------|---------------------------------------|-----------------------------------------------------------------------------------------------------------------------------------------------------------------|--|
|                                        |                                       | Stimulus control vs Control                                                                                                                                     |  |
| Quality of sleep<br>[Diary]            | ⊕⊕○○<br>LOW <sup>a,b</sup>            | The standardized mean difference in the Stimulus control group was 0.15 points lower <sup>2</sup> [0.15 points lower to 0.45 points higher] compared to control |  |
| Quality of sleep<br>[PSQI]             | ⊕⊕○○<br>LOW <sup>a,b</sup>            | The standardized mean difference in the Stimulus control group was 0.86 points lower <sup>1</sup> [0.17 points lower to 1.54 points lower] compared to control  |  |
| Sleep latency*<br>[Diary]              | ⊕⊕○○<br>LOW <sup>a,b</sup>            | The mean difference in the Stimulus control group was 14.4 minutes lower <sup>2</sup> [35.22 mins lower to 6.41 mins higher] compared to control                |  |
| Wake after sleep onset*<br>[Diary]     | ⊕⊕○○<br>LOW <sup>a,b</sup>            | The mean difference in the Stimulus control group ranged was 18.98 minutes lower <sup>2</sup> [41.78mins lower to 3.83 mins higher] compared to control         |  |
| Wake after sleep onset<br>[Actigraphy] | ⊕⊕○○<br>LOW <sup>a,b</sup>            | The mean difference in the Stimulus control group was 7.72 minutes lower <sup>2</sup> [37.29 mins lower to 21.85 mins higher] compared to control               |  |
| Remission rate*<br>[ISI]               | ⊕○○○<br>MODERATE <sup>a</sup>         | The percentage of patients achieving "remission" in the Stimulus control group was 19% higher <sup>1</sup> [6% to 31% higher] compared to control               |  |
| Insomnia severity<br>[ISI]             | ⊕⊕○○<br>LOW <sup>a,b</sup>            | The standardized mean difference in the Stimulus control group was 0.57 points lower <sup>1</sup> [0.88 to 0.26 points lower] compared to control               |  |
| Number of awakenings<br>[Diary]        | ⊕⊕○○<br>LOW <sup>a,b</sup>            | The mean difference in the Stimulus control group ranged from 0.69 to 0.70 lower <sup>1</sup> number of awakenings compared to control                          |  |
| Sleep efficiency<br>[Diary]            | ⊕⊕○○<br>LOW <sup>a,b</sup>            | The mean difference in the Stimulus control group was 7.65% higher <sup>1</sup> [2.33% lower to 17.64% higher] compared to control                              |  |
| Sleep efficiency<br>[Actigraphy]       | ⊕⊕○○<br>LOW <sup>a,b</sup>            | The mean difference in the Stimulus control group was 3.69% higher <sup>2</sup> [3.41% lower to 10.79% higher] compared to control                              |  |
| Total sleep time<br>[Diary]            | ⊕⊕⊕○<br>VERY LOW <sup>a,b,c</sup>     | The mean difference in the Stimulus control group was 9.32 minutes higher <sup>2</sup> [17.54minutes lower to 36.19 minutes higher] compared to control         |  |
| Total sleep time<br>[Actigraphy]       | ⊕⊕○○<br>LOW <sup>a,b</sup>            | The mean difference in the Stimulus control group was 3.38 minutes lower <sup>2</sup> [48.70 mins lower to 41.94 mins higher] compared to control               |  |

\* Critical Outcome

<sup>a</sup> 95% CI crosses clinical significance threshold and/or <200 participants

<sup>b</sup> Risk of bias [no patient blinding, allocation concealment]

<sup>c</sup> Double imprecision

<sup>1</sup> Meets the clinical significance threshold

<sup>2</sup> Does not meet the clinical significance threshold

# Sleep Restriction

## Quality of sleep

**Figure S88.** Dairy-determined quality of sleep, post treatment differences, sleep restriction therapy vs. control

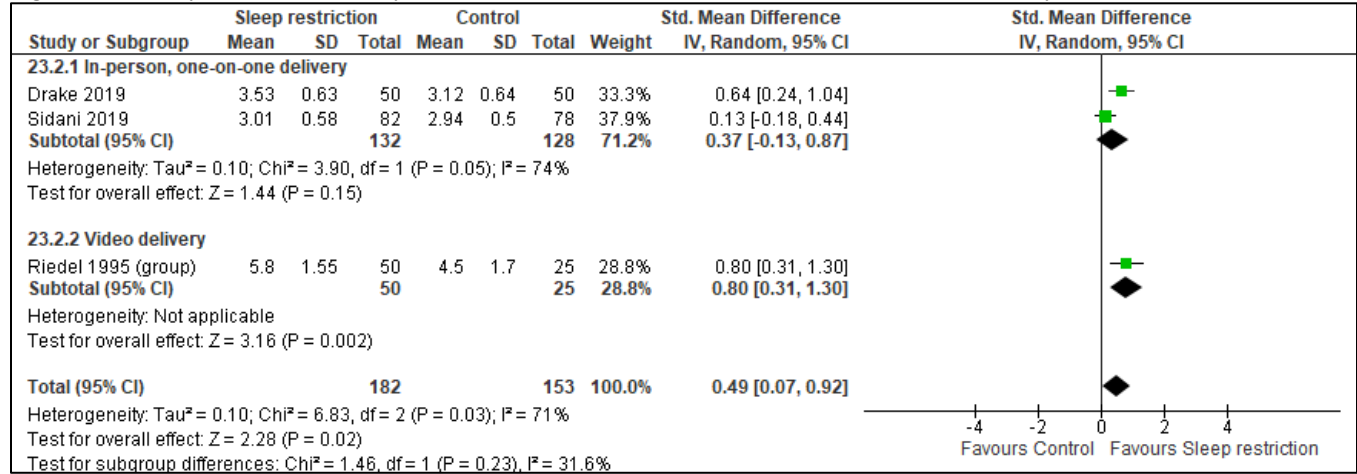

\*Pooled data video and group for Riedel 1995

## Sleep latency: Diary

**Figure S89.** Dairy-determined sleep latency (minutes), post treatment differences, sleep restriction therapy vs. control

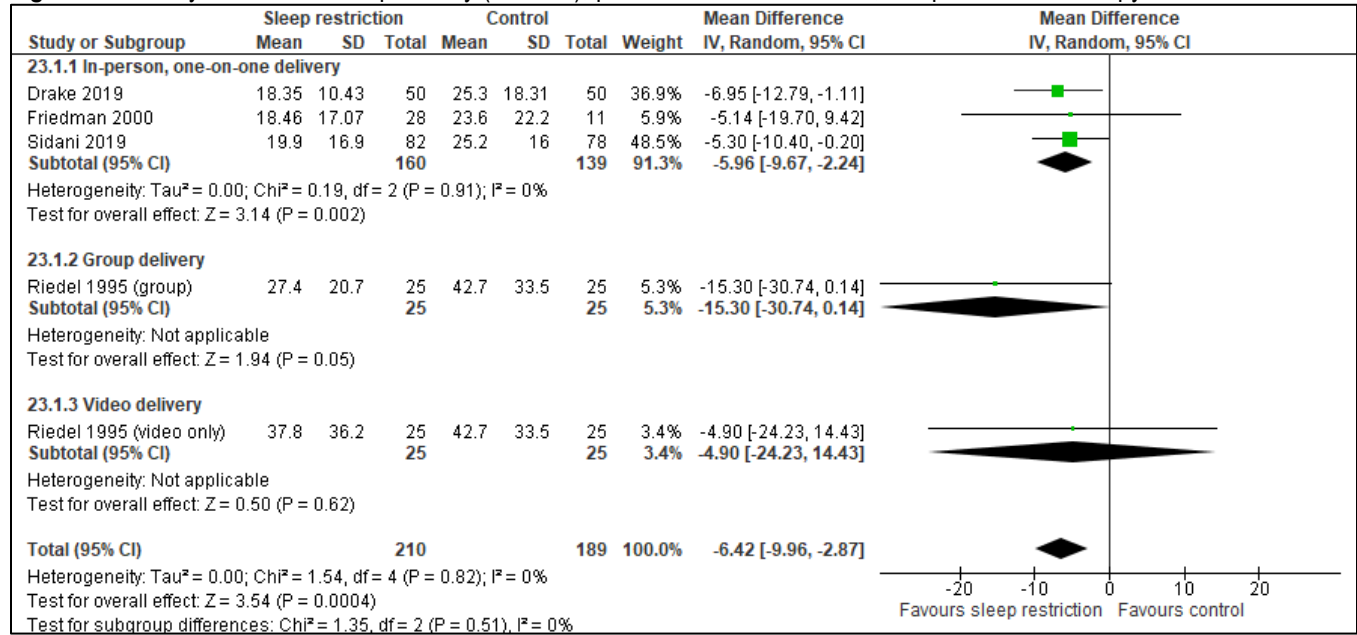

\*Riedel 1995 (group and video) uses same control data

## Sleep latency: PSG

**Table S54.** PSG-determined sleep latency (minutes), post treatment differences, sleep restriction therapy vs. control

| Study         | Delivery method                | Sleep Restriction |       |       | Control |      |       | Mean Difference, [95% CI] |
|---------------|--------------------------------|-------------------|-------|-------|---------|------|-------|---------------------------|
|               |                                | Mean              | SD    | Total | Mean    | SD   | Total |                           |
| Friedman 2000 | In-person, one-on-one delivery | 9.69              | 13.88 | 15    | 11.6    | 10.9 | 4     | -1.91[-14.69, 10.87]      |

### Wake after sleep onset: Diary

**Figure S90.** Diary-determined WASO (minutes), post treatment differences, sleep restriction therapy vs. control

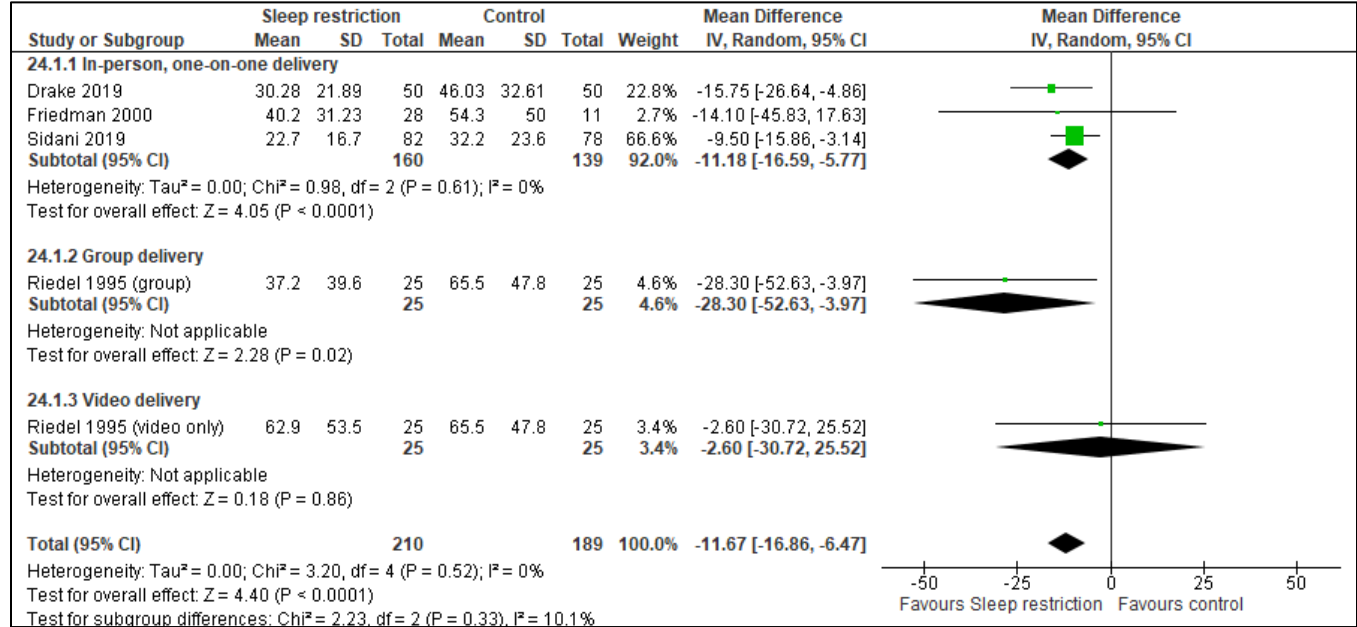

\*Riedel 1995 (group and video) uses same control data

### Wake after sleep onset: Actigraphy

**Table S55.** Actigraphy-determined WASO (minutes), post treatment differences, sleep restriction therapy vs. control

| Study         | Delivery method                | Sleep Restriction |       |       | Control |    |       | Mean Difference, [95% CI] |
|---------------|--------------------------------|-------------------|-------|-------|---------|----|-------|---------------------------|
|               |                                | Mean              | SD    | Total | Mean    | SD | Total |                           |
| Friedman 2000 | In-person, one-on-one delivery | 29.01             | 23.34 | 27    | 27.6    | 39 | 10    | 1.41[-24.32, 27.14]       |

**Table S56.** PSG-determined WASO (minutes), post treatment differences, sleep restriction therapy vs. control

| Study         | Delivery method                | Sleep Restriction |       |       | Control |      |       | Mean Difference, [95% CI] |
|---------------|--------------------------------|-------------------|-------|-------|---------|------|-------|---------------------------|
|               |                                | Mean              | SD    | Total | Mean    | SD   | Total |                           |
| Friedman 2000 | In-person, one-on-one delivery | 42.6              | 20.14 | 15    | 29      | 17.7 | 4     | 13.60[-6.52, 33.72]       |

### Remission rate

**Table S57.** ISI/Diary-determined remission rate, post treatment differences, sleep restriction therapy vs. control

| Study       | Delivery method                 | Sleep Restriction |       | Control |       | Risk Difference [95% CI] |
|-------------|---------------------------------|-------------------|-------|---------|-------|--------------------------|
|             |                                 | Events            | Total | Events  | Total |                          |
| Drake 2019  | In-person, one-on-one, delivery | 28                | 49    | 16      | 48    | 0.24[0.05, 0.43]         |
| Sidani 2019 | In-person, one-on-one, delivery | 22                | 82    | 11      | 78    | 0.13[ 0.00, 0.26]        |

### Insomnia severity

**Table S58** ISI-determined insomnia severity, post treatment differences, sleep restriction therapy vs. control

| Study       | Delivery method                | Sleep Restriction |      |       | Control |      |       | Std. Mean Difference, [95% CI] |
|-------------|--------------------------------|-------------------|------|-------|---------|------|-------|--------------------------------|
|             |                                | Mean              | SD   | Total | Mean    | SD   | Total |                                |
| Drake 2019  | In-person, one-on-one delivery | 8.64              | 4.18 | 50    | 14.24   | 4.49 | 50    | -1.28[-1.71, -0.85]            |
| Sidani 2019 | In-person, one-on-one delivery | 10.05             | 4.51 | 82    | 13.07   | 4.76 | 78    | -0.65[-0.97, -0.33]            |

### Number of nighttime awakenings

**Table S59.** Diary-determined number of awakenings, post treatment differences, sleep restriction therapy vs. control

| Study       | Delivery method                | Sleep Restriction |     |       | Control |     |       | Mean Difference, [95% CI] |
|-------------|--------------------------------|-------------------|-----|-------|---------|-----|-------|---------------------------|
|             |                                | Mean              | SD  | Total | Mean    | SD  | Total |                           |
| Sidani 2019 | In-person, one-on-one delivery | 1.4               | 1.2 | 82    | 2       | 2.4 | 78    | -0.60[-1.19, -0.01]       |

### Sleep efficiency

**Figure S91.** Diary-determined sleep efficiency (%), post treatment differences, sleep restriction therapy vs. control

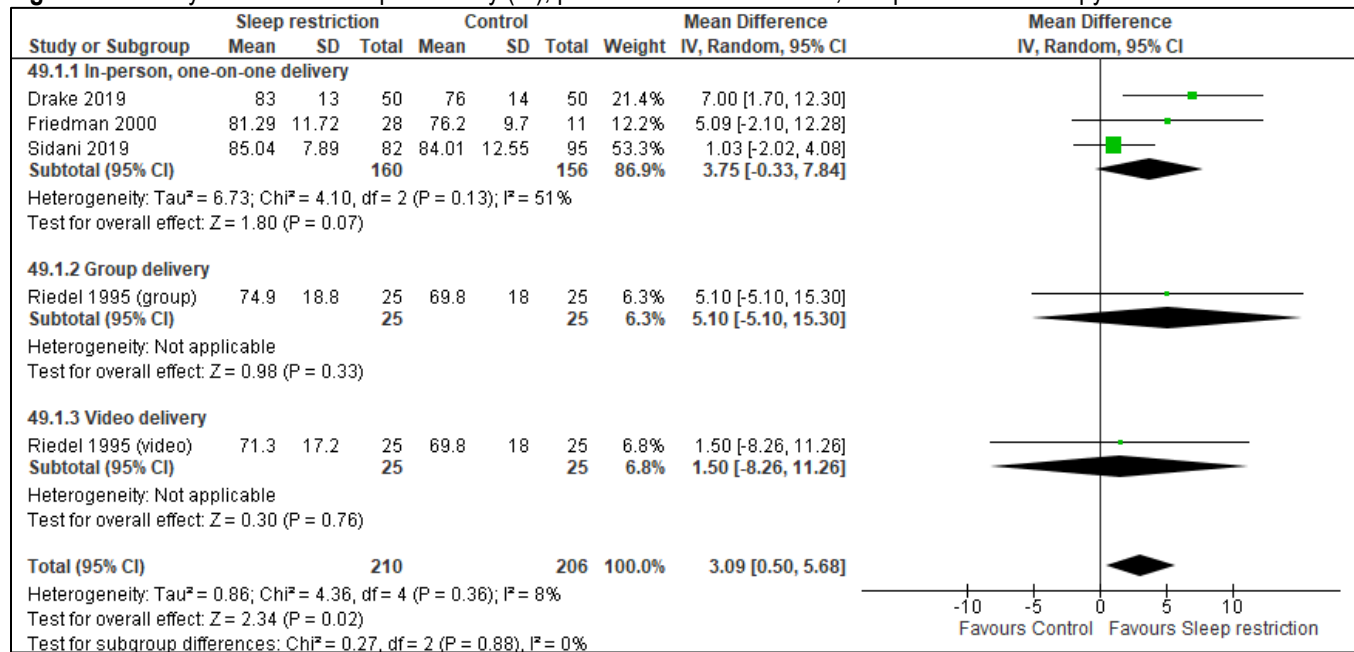

\*Riedel 1995 (group and video) uses same control data

**Table S60.** Actigraphy-determined sleep efficiency (%), post treatment differences, sleep restriction therapy vs. control

| Study         | Delivery method                | Sleep Restriction |      |       | Control |     |       | Mean Difference, [95% CI] |
|---------------|--------------------------------|-------------------|------|-------|---------|-----|-------|---------------------------|
|               |                                | Mean              | SD   | Total | Mean    | SD  | Total |                           |
| Friedman 2000 | In-person, one-on-one delivery | 89.51             | 5.86 | 27    | 89.4    | 6.6 | 10    | 0.11 [-4.24, 4.76]        |

**Table S61.** PSG-determined sleep efficiency (%), post treatment differences, sleep restriction therapy vs. control

| Study         | Delivery method                | Sleep Restriction |      |       | Control |    |       | Mean Difference, [95% CI] |
|---------------|--------------------------------|-------------------|------|-------|---------|----|-------|---------------------------|
|               |                                | Mean              | SD   | Total | Mean    | SD | Total |                           |
| Friedman 2000 | In-person, one-on-one delivery | 84.49             | 7.59 | 15    | 90.1    | 4  | 3     | -5.61 [-11.55, 0.33]      |

Total sleep time

**Figure S92.** Diary-determined total sleep time (minutes), post treatment differences, sleep restriction therapy vs. control

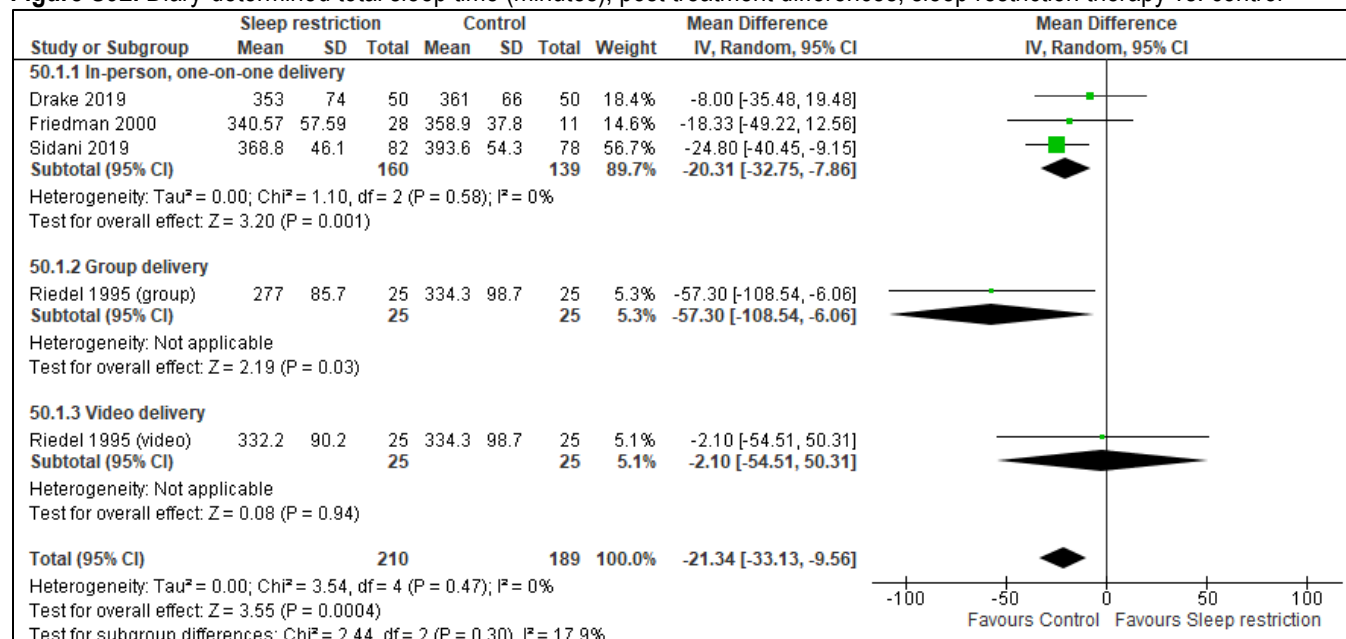

\*Riedel 1995 (group and video) uses same control data

**Table S62.** Actigraphy-determined total sleep time (minutes), post treatment differences, sleep restriction therapy vs. control

| Study         | Delivery method                | Sleep Restriction |       |       | Control |      |       | Mean Difference, [95% CI] |
|---------------|--------------------------------|-------------------|-------|-------|---------|------|-------|---------------------------|
|               |                                | Mean              | SD    | Total | Mean    | SD   | Total |                           |
| Friedman 2000 | In-person, one-on-one delivery | 381.94            | 27.82 | 27    | 422.2   | 55.4 | 10    | -40.26 [-76.16, -4.36]    |

**Table S63.** PSG-determined total sleep time (minutes), post treatment differences, sleep restriction therapy vs. control

| Study         | Delivery method                | Sleep Restriction |       |       | Control |       |       | Mean Difference, [95% CI] |
|---------------|--------------------------------|-------------------|-------|-------|---------|-------|-------|---------------------------|
|               |                                | Mean              | SD    | Total | Mean    | SD    | Total |                           |
| Friedman 2000 | In-person, one-on-one delivery | 339.99            | 38.95 | 15    | 383.9   | 43.91 | 4     | -43.91 [-90.52, 2.70]     |

**Table S64.** Summary of findings table for sleep restriction for the psychological and behavioral treatment of insomnia in adults

| <b>References:</b> Riedel 1995 (A); Friedman 2000 (B); Epstein 2012 (C); Drake 2019 (D); Sidani 2019 (E) |                                                  |                                                                                                                                                               |                                               |
|----------------------------------------------------------------------------------------------------------|--------------------------------------------------|---------------------------------------------------------------------------------------------------------------------------------------------------------------|-----------------------------------------------|
| <b>Outcomes</b><br>[Tool]                                                                                | <b>Quality of the evidence</b><br><b>(GRADE)</b> | <b>Absolute Difference</b><br><br><b>SR vs Control</b>                                                                                                        | <b>No of Participants</b><br><b>(studies)</b> |
| <b>Quality of sleep*</b><br>[Diary]                                                                      | ⊕⊕○○<br><b>LOW</b> <sup>a,b</sup>                | The standardized mean difference in the Sleep restriction group was 0.49 points higher <sup>1</sup> [0.07 to 0.92 points higher] compared to control          | 335 patients<br>(3 RCT) <sup>A,D,E</sup>      |
| <b>Sleep latency*</b><br>[Diary]                                                                         | ⊕⊕⊕○<br><b>MODERATE</b> <sup>b</sup>             | The mean difference in the Sleep restriction group was 6.42 minutes lower <sup>2</sup> [2.87 mins to 9.96 mins lower] compared to control                     | 374 patients<br>(4 RCT) <sup>A,B,D,E</sup>    |
| <b>Sleep latency</b><br>[PSG]                                                                            | ⊕⊕○○<br><b>LOW</b> <sup>a,b</sup>                | The mean difference in the Sleep restriction group was 1.91 minutes lower <sup>2</sup> [14.69 mins lower to 10.87 mins higher] compared to control            | 19 patients<br>(1 RCT) <sup>B</sup>           |
| <b>Wake after sleep onset*</b><br>[Diary]                                                                | ⊕⊕⊕○<br><b>MODERATE</b> <sup>b</sup>             | The mean difference in the Sleep restriction group was 11.67 minutes lower <sup>1</sup> [6.47 mins to 16.86 mins lower] compared to control                   | 374 patients<br>(4 RCT) <sup>A,B,D,E</sup>    |
| <b>Wake after sleep onset</b><br>[Actigraphy]                                                            | ⊕⊕○○<br><b>LOW</b> <sup>a,b</sup>                | The mean difference in the Sleep restriction group was 1.41 minutes higher <sup>2</sup> [24.32 mins lower to 27.14 mins higher] compared to control           | 37 patients<br>(1 RCT) <sup>B</sup>           |
| <b>Wake after sleep onset</b><br>[PSG]                                                                   | ⊕⊕○○<br><b>LOW</b> <sup>a,b</sup>                | The mean difference in the Sleep restriction group was 13.6 minutes higher <sup>2</sup> [6.52 mins lower to 33.72 mins higher] compared to control            | 19 patients<br>(1 RCT) <sup>B</sup>           |
| <b>Remission rate*</b><br>[ISI]                                                                          | ⊕⊕○○<br><b>LOW</b> <sup>a,b</sup>                | The percentage of patients achieving "remission" in the Sleep restriction group ranged from 16% higher <sup>1</sup> [6% to 26% higher] compared to control    | 257 patients<br>(2 RCT) <sup>D,E</sup>        |
| <b>Responder rate*</b><br>[ISI]                                                                          | ⊕⊕○○<br><b>LOW</b> <sup>a,b</sup>                | The percentage of patients considered "responders" in the Sleep restriction group ranged from 35% higher <sup>1</sup> [14% to 55% higher] compared to control | 73 patients<br>(1 RCT) <sup>C</sup>           |
| <b>Insomnia severity</b><br>[ISI]                                                                        | ⊕⊕○○<br><b>LOW</b> <sup>a,b</sup>                | The mean difference in the Sleep restriction group was 0.95 points lower <sup>1</sup> [0.33 to 1.57 points lower] compared to control                         | 260 patients<br>(2 RCT) <sup>D,E</sup>        |
| <b>Number of awakenings</b><br>[Diary]                                                                   | ⊕⊕○○<br><b>LOW</b> <sup>a,c</sup>                | The mean difference in the Sleep restriction group was 0.60 fewer awakenings <sup>1</sup> [1.19 to 0.01 fewer no.of awakenings] compared to control           | 160 patients<br>(1 RCT) <sup>E</sup>          |
| <b>Sleep efficiency</b><br>[Diary]                                                                       | ⊕⊕○○<br><b>LOW</b> <sup>a,b</sup>                | The mean difference in the Sleep restriction group was 3.09% higher <sup>2</sup> [0.50% lower to 5.68% higher] compared to control                            | 416 patients<br>(4 RCT) <sup>A,B,D,E</sup>    |
| <b>Sleep efficiency</b><br>[Actigraphy]                                                                  | ⊕⊕○○<br><b>LOW</b> <sup>a,b</sup>                | The mean difference in the Sleep restriction group was 0.11% higher <sup>2</sup> 4.54% lower to 4.76% higher] compared to control                             | 37 patients<br>(1 RCT) <sup>B</sup>           |
| <b>Sleep efficiency</b><br>[PSG]                                                                         | ⊕⊕○○<br><b>LOW</b> <sup>a,b</sup>                | The mean difference in the Sleep restriction group was 5.61% lower <sup>2</sup> [1.55% lower to 0.33% higher] compared to control                             | 19 patients<br>(1 RCT) <sup>B</sup>           |
| <b>Total sleep time</b><br>[Diary]                                                                       | ⊕⊕○○<br><b>LOW</b> <sup>a,b</sup>                | The mean difference in the Sleep restriction group was 21.34 minutes lower <sup>2</sup> [33.13 mins to 9.56 mins lower] compared to control                   | 374 patients<br>(4 RCT) <sup>A,B,D,E</sup>    |
| <b>Total sleep time</b><br>[Actigraphy]                                                                  | ⊕⊕○○<br><b>LOW</b> <sup>a,b</sup>                | The mean difference in the Sleep restriction group was 40.26 minutes lower <sup>2</sup> [4.36 mins to 76.16 mins lower] compared to control                   | 37 patients<br>(1 RCT) <sup>B</sup>           |
| <b>Total sleep time</b><br>[PSG]                                                                         | ⊕⊕○○<br><b>LOW</b> <sup>a,b</sup>                | The mean difference in the Sleep restriction group was 43.91 minutes lower <sup>2</sup> [90.52 mins lower to 2.7 mins higher] compared to control             | 19 patients<br>(1 RCT) <sup>B</sup>           |

\* Critical Outcome

<sup>a</sup> 95% CI crosses clinical significance threshold and/or <200 participants

<sup>b</sup> Risk of bias [no patient blinding, allocation concealment, missing data]

<sup>1</sup> Meets the clinical significance threshold

<sup>2</sup> Does not meet the clinical significance threshold

# Relaxation Therapy

## Quality of sleep

**Table S65.** Diary-determined quality of sleep, post treatment differences, relaxation therapy vs. control

| Study      | Delivery method    | Relaxation Therapy |      |       | Control |      |       | Std. Mean Difference, [95% CI] |
|------------|--------------------|--------------------|------|-------|---------|------|-------|--------------------------------|
|            |                    | Mean               | SD   | Total | Mean    | SD   | Total |                                |
| Means 2000 | In-person delivery | 3.4                | 0.4  | 28    | 3       | 0.4  | 29    | 0.99 [0.43, 1.54]              |
| Creti 2005 | Audio delivery     | 3.31               | 0.68 | 14    | 3.32    | 0.65 | 13    | -0.01 [-0.77, 0.74]            |

## Quality of sleep (PSQI)

**Table S66.** PSQI-determined quality of sleep, post treatment differences, relaxation therapy vs. control

| Study          | Delivery method | Relaxation Therapy |     |       | Control |     |       | Std. Mean Difference, [95% CI] |
|----------------|-----------------|--------------------|-----|-------|---------|-----|-------|--------------------------------|
|                |                 | Mean               | SD  | Total | Mean    | SD  | Total |                                |
| Rybarczyk 2002 | Audio delivery  | 7.5                | 3.6 | 14    | 10.7    | 2.8 | 13    | -0.96 [-1.76, -0.15]           |

## Sleep latency

**Figure S93.** Diary-determined sleep latency (minutes), post treatment differences, relaxation therapy vs. control

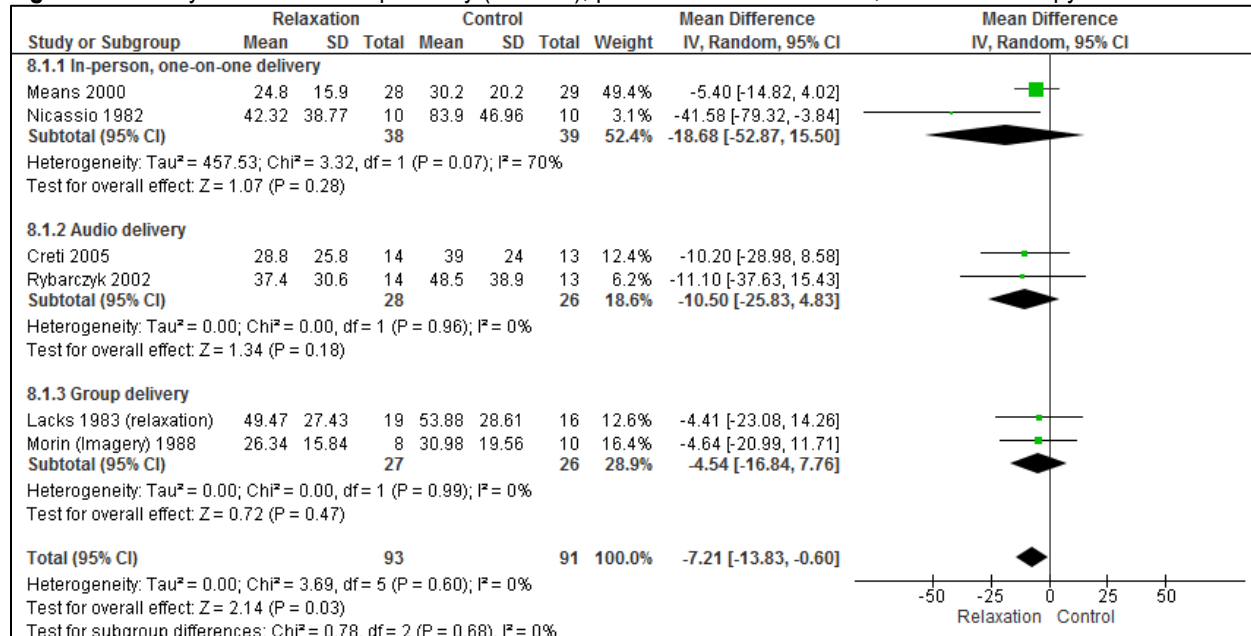

### Wake after sleep onset

**Figure S94.** Diary-determined WASO (minutes), post treatment differences, relaxation therapy vs. control

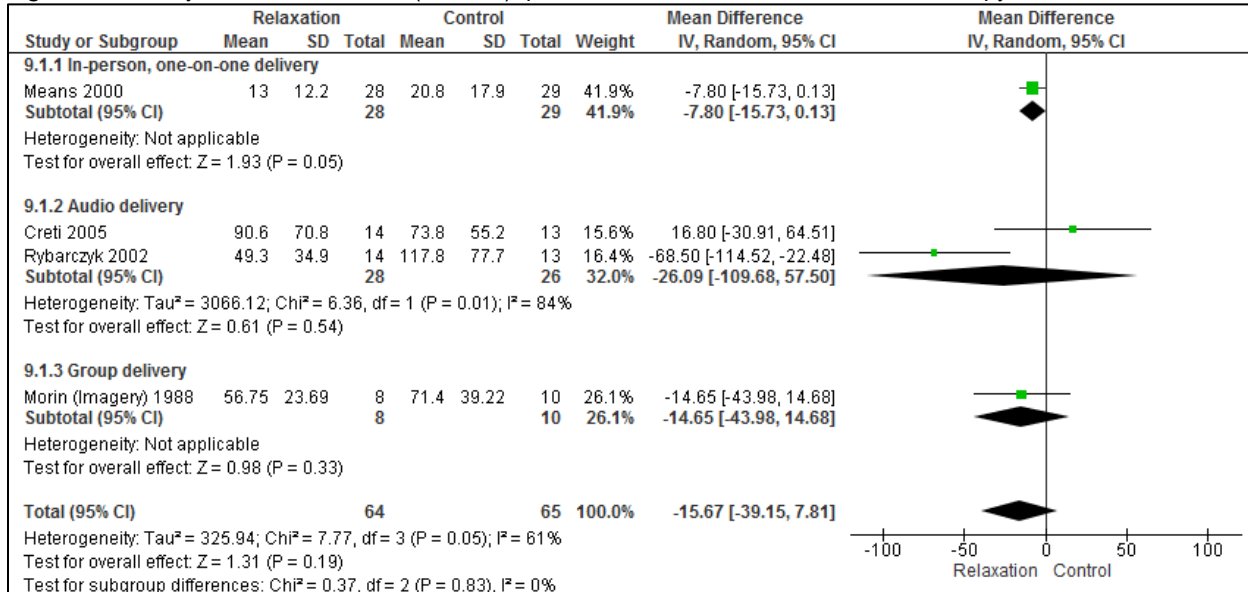

### Wake after sleep onset (Act)

**Table S67.** Actigraphy-determined WASO (minutes), post treatment differences, relaxation therapy vs. control

| Study         | Delivery method | Relaxation Therapy |      |       | Control |      |       | Mean Difference, [95% CI] |
|---------------|-----------------|--------------------|------|-------|---------|------|-------|---------------------------|
|               |                 | Mean               | SD   | Total | Mean    | SD   | Total |                           |
| Rybarczyk2002 | Audio delivery  | 77.1               | 41.5 | 14    | 102.1   | 57.1 | 13    | -25.0 [-62.89, 12.89]     |

### Responder rate

**Figure S95.** Diary-determined responder rate (%), post treatment differences, relaxation therapy vs. control

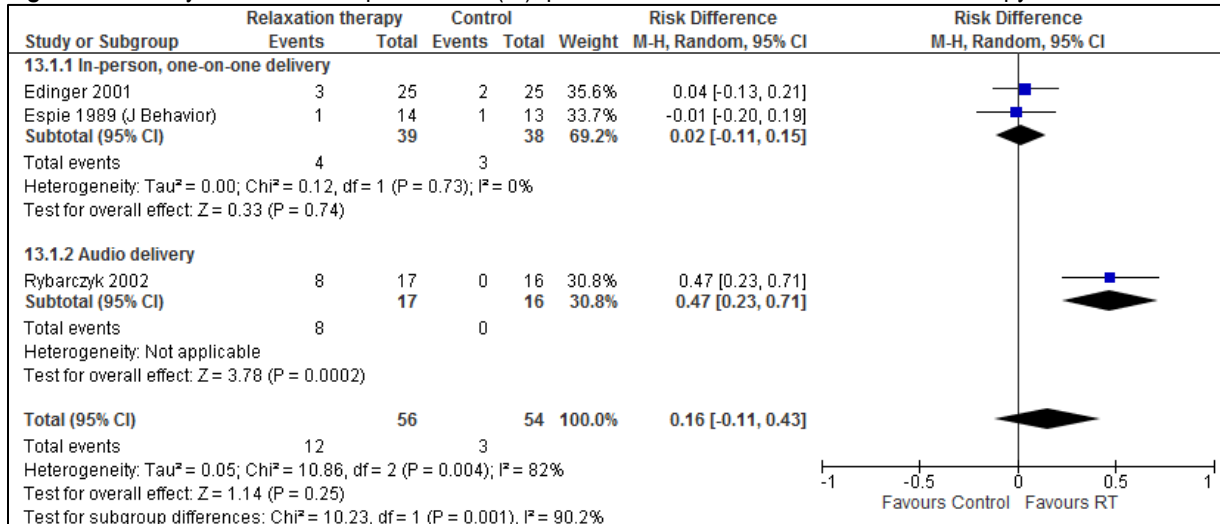



## Beliefs and attitudes about sleep

**Table S68.** Dysfunctional Beliefs and Attitudes about Sleep (DBAS)-determined beliefs and attitudes about sleep, post treatment differences, relaxation therapy vs. control

| Study         | Delivery method       | Relaxation Therapy |     |       | Control |     |       | Std. Mean Difference, [95% CI] |
|---------------|-----------------------|--------------------|-----|-------|---------|-----|-------|--------------------------------|
|               |                       | Mean               | SD  | Total | Mean    | SD  | Total |                                |
| Rybarczyk2002 | Audio delivery        | 18.5               | 7.9 | 14    | 27.2    | 8.8 | 13    | -1.01 [-1.82, -0.20]           |
| Means 2000    | In-person, one-on-one | 4.4                | 1   | 28    | 4.7     | 1.1 | 29    | -0.28[-0.80, 0.24]             |

## Nights using hypnotics

**Table S69.** Diary-determined nights using hypnotics (nights/week), post treatment differences, relaxation therapy vs. control

| Study         | Delivery method | Relaxation Therapy |     |       | Control |     |       | Mean Difference, [95% CI] |
|---------------|-----------------|--------------------|-----|-------|---------|-----|-------|---------------------------|
|               |                 | Mean               | SD  | Total | Mean    | SD  | Total |                           |
| Rybarczyk2002 | Audio delivery  | 0.9                | 1.9 | 14    | 2.3     | 3.1 | 12    | -1.40 [-3.42, 0.62]       |

## Number of awakenings

**Table S70.** Diary-determined number of awakenings (no./night), post treatment differences, relaxation therapy vs. control

| Study                | Delivery method | Relaxation Therapy |      |       | Control |      |       | Mean Difference, [95% CI] |
|----------------------|-----------------|--------------------|------|-------|---------|------|-------|---------------------------|
|                      |                 | Mean               | SD   | Total | Mean    | SD   | Total |                           |
| Morin (Imagery) 1988 | Group delivery  | 2.46               | 1.24 | 8     | 2.61    | 1.07 | 10    | -0.15 [-1.24, 0.94]       |

## Sleep efficiency

**Figure S96.** Diary-determined sleep efficiency (%), post treatment differences, relaxation therapy vs. control

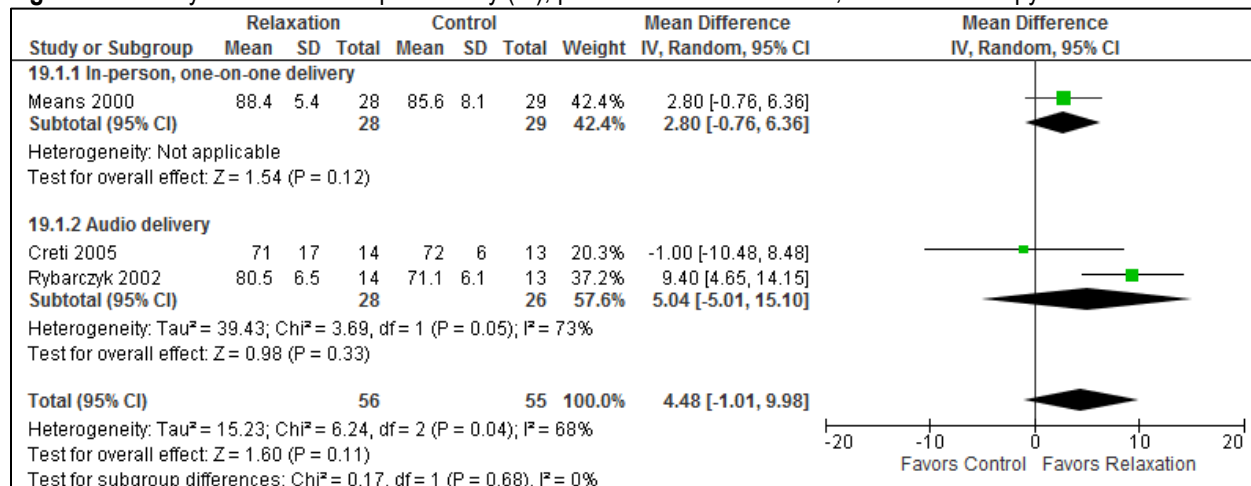

**Table S71.** Actigraphy-determined sleep efficiency (%), post treatment differences, relaxation therapy vs. control

| Study         | Delivery method | Relaxation Therapy |      |       | Control |     |       | Mean Difference, [95% CI] |
|---------------|-----------------|--------------------|------|-------|---------|-----|-------|---------------------------|
|               |                 | Mean               | SD   | Total | Mean    | SD  | Total |                           |
| Rybarczyk2002 | Audio delivery  | 77.4               | 12.8 | 14    | 76.8    | 8.6 | 13    | 0.60 [-7.57, 8.77]        |

## Total sleep time

**Figure S97.** Diary-determined total sleep time (minutes) post treatment differences, relaxation therapy vs. control

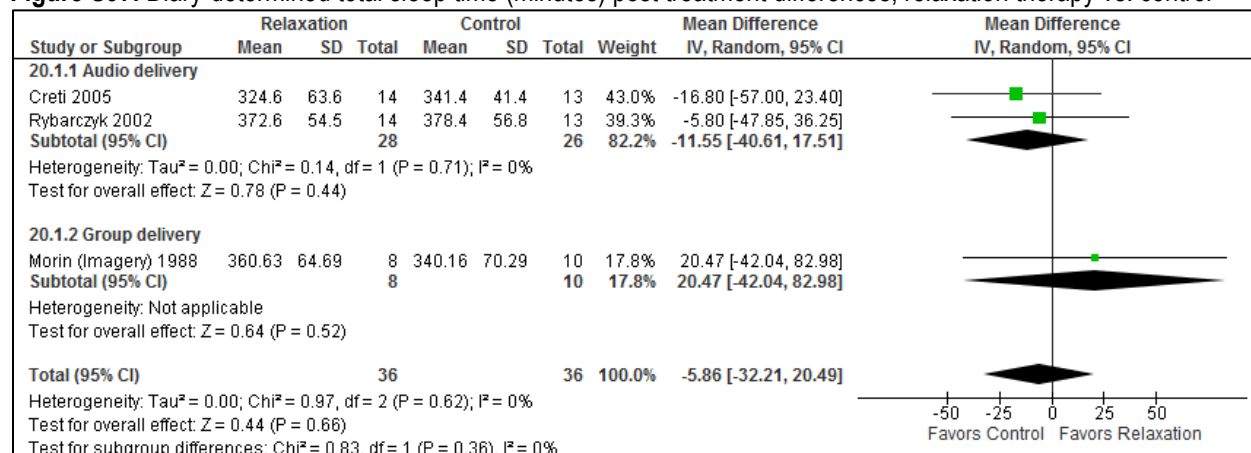

**Table S72.** Actigraphy-determined total sleep time (minutes), post treatment differences, relaxation therapy vs. control

| Study          | Delivery method | Relaxation Therapy |       |       | Control |    |       | Mean Difference, [95% CI] |
|----------------|-----------------|--------------------|-------|-------|---------|----|-------|---------------------------|
|                |                 | Mean               | SD    | Total | Mean    | SD | Total |                           |
| Rybarczyk 2002 | Audio delivery  | 439.8              | 109.1 | 14    | 466.5   | 67 | 13    | -27.50 [-95.27, 40.27]    |

**Table S73.** Summary of findings table for relaxation therapy for the treatment of psychological and behavioral insomnia in adults

**References:** Means 2000 (A); Creti 2005 (B); Rybarczyk 2002 (C); Nicassio 1982 (D); Lacks 1983 (E); Morin 1988 (F); Edinger 2001 (G); Espie 1989 (H)

| Outcomes<br>[Tool]                                 | Quality of the<br>evidence<br>(GRADE)    | Absolute Difference                                                                                                                                            | No of Participants<br>(studies)                |
|----------------------------------------------------|------------------------------------------|----------------------------------------------------------------------------------------------------------------------------------------------------------------|------------------------------------------------|
|                                                    |                                          | RT vs Control                                                                                                                                                  |                                                |
| <b>Quality of sleep*</b><br>[Diary]                | ⊕○○○<br><b>VERY LOW</b> <sup>a,b,c</sup> | The standardized mean difference in the RT group was 0.52 points higher <sup>1</sup> [0.46 points lower to 1.50 points higher] compared to control             | 84 patients<br>(2 RCT) <sup>A,B</sup>          |
| <b>Quality of sleep</b><br>[PSQI]                  | ⊕⊕○○<br><b>LOW</b> <sup>a,c</sup>        | The standardized mean difference in the RT group was 0.96 points lower <sup>1</sup> [0.15 points lower to 1.76 points lower] compared to control               | 27 patients<br>(1 RCT) <sup>C</sup>            |
| <b>Sleep latency*</b><br>[Diary]                   | ⊕⊕○○<br><b>LOW</b> <sup>a,c</sup>        | The mean difference in the RT group was 7.21 mins lower <sup>2</sup> [0.60 mins to 13.83 mins lower] compared to control                                       | 184 patients<br>(6 RCT) <sup>A,B,C,D,E,F</sup> |
| <b>Wake after sleep onset*</b><br>[Diary]          | ⊕⊕○○<br><b>LOW</b> <sup>a,c</sup>        | The mean difference in the RT group was 15.67 mins lower <sup>2</sup> [39.15 mins lower to 7.81 mins higher] compared to control                               | 129 patients<br>(3 RCT) <sup>A,B,C,F</sup>     |
| <b>Responder rate*</b><br>[Diary/ISI]              | ⊕○○○<br><b>VERY LOW</b> <sup>a,b,c</sup> | The percentage of patients considered "responders" in the RT group was 16% higher <sup>1</sup> [11% lower to 43% higher] compared to control                   | 109 patients<br>(3 RCT) <sup>C,G,H</sup>       |
| <b>Beliefs and attitudes about sleep</b><br>[DBAS] | ⊕⊕○○<br><b>LOW</b> <sup>a,c</sup>        | The mean difference in the RT group ranged from 0.28 to 1.01 points lower <sup>1</sup> compared to control                                                     | 84 patients<br>(2 RCT) <sup>C</sup>            |
| <b>Nights using hypnotics</b><br>[Diary]           | ⊕⊕○○<br><b>LOW</b> <sup>a,c</sup>        | The mean difference in the RT group was 1.4 nights per week lower <sup>2</sup> [3.42 nights per week lower to 0.62 nights per week higher] compared to control | 26 patients<br>(1 RCT) <sup>C</sup>            |
| <b>Number of awakenings</b><br>[Diary]             | ⊕⊕○○<br><b>LOW</b> <sup>a,c</sup>        | The mean difference in the RT group was 0.15 points lower <sup>2</sup> [1.24 points lower to 0.94 points higher] compared to control                           | 18 patients<br>(1 RCT) <sup>F</sup>            |
| <b>Sleep efficiency</b><br>[Diary]                 | ⊕⊕○○<br><b>LOW</b> <sup>a,c</sup>        | The mean difference in the RT group was 4.48% higher <sup>2</sup> [1.01% lower to 9.98% higher] compared to control                                            | 111 patients<br>(3 RCT) <sup>A,B,C</sup>       |
| <b>Sleep efficiency</b><br>[Actigraphy]            | ⊕⊕○○<br><b>LOW</b> <sup>a,c</sup>        | The mean difference in the RT group was 0.6% higher <sup>2</sup> [7.57% lower to 8.77% higher] compared to control                                             | 27 patients<br>(1 RCT) <sup>C</sup>            |
| <b>Total sleep time</b><br>[Diary]                 | ⊕⊕○○<br><b>LOW</b> <sup>a,c</sup>        | The mean difference in the RT group was 5.86 minutes lower <sup>2</sup> [32.21 mins lower to 20.49 mins higher] compared to control                            | 72 patients<br>(3 RCT) <sup>B,C,F</sup>        |
| <b>Total sleep time</b><br>[Actigraphy]            | ⊕⊕○○<br><b>LOW</b> <sup>a,c</sup>        | The mean difference in the RT group was 27.5 minutes lower <sup>2</sup> [95.27 mins lower to 40.27 mins higher] compared to control                            | 27 patients<br>(1 RCT) <sup>C</sup>            |

\* Critical Outcome

<sup>a</sup> 95% CI crosses clinical significance threshold and/or <200 participants

<sup>b</sup> Inconsistent subgroup differences

<sup>c</sup> Risk of bias [no patient blinding, allocation concealment]

<sup>1</sup> Meets the clinical significance threshold

<sup>2</sup> Does not meet the clinical significance threshold

## Sleep Hygiene

### Sleep latency

**Table S74.** Diary-determined sleep latency (minutes), post treatment differences, sleep hygiene vs. control

| Study        | Delivery method    | Sleep hygiene |       |       | Control |      |       | Mean Difference, [95% CI] |
|--------------|--------------------|---------------|-------|-------|---------|------|-------|---------------------------|
|              |                    | Mean          | SD    | Total | Mean    | SD   | Total |                           |
| Edinger 2005 | In-person delivery | 15.1          | 11.13 | 17    | 15.9    | 16.8 | 9     | -0.80 [-12.98, 11.38]     |

### Wake after sleep onset

**Table S75.** Diary-determined WASO (minutes), post treatment differences, sleep hygiene vs. control

| Study        | Delivery method    | Sleep hygiene |      |       | Control |      |       | Mean Difference, [95% CI] |
|--------------|--------------------|---------------|------|-------|---------|------|-------|---------------------------|
|              |                    | Mean          | SD   | Total | Mean    | SD   | Total |                           |
| Edinger 2005 | In-person delivery | 50.5          | 28.4 | 17    | 65.7    | 31.2 | 9     | -15.20 [-39.65, 9.25]     |

### Wake after sleep onset

**Table S76.** Actigraphy-determined WASO (minutes), post treatment differences, sleep hygiene vs. control

| Study        | Delivery method    | Sleep hygiene |      |       | Control |      |       | Mean Difference, [95% CI] |
|--------------|--------------------|---------------|------|-------|---------|------|-------|---------------------------|
|              |                    | Mean          | SD   | Total | Mean    | SD   | Total |                           |
| Edinger 2005 | In-person delivery | 59.6          | 24.3 | 17    | 72.2    | 39.6 | 9     | -12.60 [-40.93, 15.73]    |

### Responder rate

**Table S77.** Diary-determined responder rate, post treatment differences, sleep hygiene vs. control

| Study        | Delivery method    | Sleep hygiene |       | Control |       | Risk Difference [95% CI] |
|--------------|--------------------|---------------|-------|---------|-------|--------------------------|
|              |                    | Events        | Total | Events  | Total |                          |
| Edinger 2005 | In-person delivery | 2             | 12    | 0       | 8     | 0.17 [-0.09, 0.43]       |

### Sleep efficiency

**Table S78.** Diary-determined sleep efficiency (%), post treatment differences, sleep hygiene vs. control

| Study        | Delivery method    | Sleep hygiene |      |       | Control |     |       | Mean Difference, [95% CI] |
|--------------|--------------------|---------------|------|-------|---------|-----|-------|---------------------------|
|              |                    | Mean          | SD   | Total | Mean    | SD  | Total |                           |
| Edinger 2005 | In-person delivery | 84.7          | 7.01 | 17    | 83.3    | 7.2 | 9     | 1.40 [-4.36, 7.16]        |

**Table S79.** Actigraphy-determined sleep efficiency (%), post treatment differences, sleep hygiene vs. control

| Study        | Delivery method    | Sleep hygiene |      |       | Control |     |       | Mean Difference, [95% CI] |
|--------------|--------------------|---------------|------|-------|---------|-----|-------|---------------------------|
|              |                    | Mean          | SD   | Total | Mean    | SD  | Total |                           |
| Edinger 2005 | In-person delivery | 85.4          | 5.77 | 17    | 82.6    | 9.3 | 9     | 2.80 [-3.87, 9.47]        |

### Total wake time

**Table S80.** Diary-determined total wake time (minutes), post treatment differences, sleep hygiene vs. control

| Study        | Delivery method    | Sleep hygiene |       |       | Control |    |       | Mean Difference, [95% CI] |
|--------------|--------------------|---------------|-------|-------|---------|----|-------|---------------------------|
|              |                    | Mean          | SD    | Total | Mean    | SD | Total |                           |
| Edinger 2005 | In-person delivery | 76.4          | 35.57 | 17    | 88.7    | 45 | 9     | -12.30 [-46.22, 21.62]    |

**Table S81.** Actigraphy-determined total wake time (minutes), post treatment differences, sleep hygiene vs. control

| Study        | Delivery method    | Sleep hygiene |       |       | Control |    |       | Mean Difference, [95% CI] |
|--------------|--------------------|---------------|-------|-------|---------|----|-------|---------------------------|
|              |                    | Mean          | SD    | Total | Mean    | SD | Total |                           |
| Edinger 2005 | In-person delivery | 72            | 30.92 | 17    | 90.3    | 51 | 9     | -18.30 [-54.72, 18.12]    |

### Total sleep time

**Table S82.** Diary-determined total sleep time (minutes), post treatment differences, sleep hygiene vs. control.

| Study        | Delivery method    | Sleep hygiene |       |       | Control |      |       | Mean Difference, [95% CI] |
|--------------|--------------------|---------------|-------|-------|---------|------|-------|---------------------------|
|              |                    | Mean          | SD    | Total | Mean    | SD   | Total |                           |
| Edinger 2005 | In-person delivery | 424.8         | 61.85 | 17    | 432.5   | 54.3 | 9     | -7.70 [-53.78, 38.38]     |

**Table S83.** Actigraphy-determined total sleep time (minutes), post treatment differences, sleep hygiene vs. control

| Study        | Delivery method    | Sleep hygiene |       |       | Control |      |       | Mean Difference, [95% CI] |
|--------------|--------------------|---------------|-------|-------|---------|------|-------|---------------------------|
|              |                    | Mean          | SD    | Total | Mean    | SD   | Total |                           |
| Edinger 2005 | In-person delivery | 421.6         | 51.13 | 17    | 428.7   | 78.3 | 9     | -7.10 [-63.74, 49.54]     |

**Table S84.** Summary of findings table for sleep hygiene for the psychological and behavioral treatment of insomnia in adults

References: Edinger 2005 (A)

| Outcomes<br>[Tool]                            | Quality of the<br>evidence<br>(GRADE) | Absolute Difference<br><br>SH vs Control                                                                                                        | No of Participants<br>(studies)     |
|-----------------------------------------------|---------------------------------------|-------------------------------------------------------------------------------------------------------------------------------------------------|-------------------------------------|
| <b>Sleep latency*</b><br>[Diary]              | ⊕⊕○○<br><b>LOW</b> <sup>a,b</sup>     | The mean difference in the Sleep hygiene group was 0.8 minutes lower <sup>2</sup> [12.98 mins lower to 11.38 mins higher] compared to control   | 26 patients<br>(1 RCT) <sup>A</sup> |
| <b>Wake after sleep onset*</b><br>[Diary]     | ⊕⊕○○<br><b>LOW</b> <sup>a,b</sup>     | The mean difference in the Sleep hygiene group was 15.20 minutes lower <sup>2</sup> [39.65 mins lower to 9.25 mins higher] compared to control  | 26 patients<br>(1 RCT) <sup>A</sup> |
| <b>Wake after sleep onset</b><br>[Actigraphy] | ⊕⊕○○<br><b>LOW</b> <sup>a,b</sup>     | The mean difference in the Sleep hygiene group was 12.60 minutes lower <sup>2</sup> [40.93 mins lower to 15.73 mins higher] compared to control | 26 patients<br>(1 RCT) <sup>A</sup> |
| <b>Sleep efficiency</b><br>[Diary]            | ⊕⊕○○<br><b>LOW</b> <sup>a,b</sup>     | The mean difference in the Sleep hygiene group was 1.4% higher <sup>2</sup> [4.36% lower to 7.16% higher] compared to control                   | 26 patients<br>(1 RCT) <sup>A</sup> |
| <b>Sleep efficiency</b><br>[Actigraphy]       | ⊕⊕○○<br><b>LOW</b> <sup>a,b</sup>     | The mean difference in the Sleep hygiene group was 2.8% higher <sup>2</sup> [3.87% lower to 9.47% higher] compared to control                   | 26 patients<br>(1 RCT) <sup>A</sup> |
| <b>Total wake time</b><br>[Diary]             | ⊕⊕○○<br><b>LOW</b> <sup>a,b</sup>     | The mean difference in the Sleep hygiene group was 12.3 minutes lower <sup>2</sup> [46.22 mins lower to 21.62 mins higher] compared to control  | 26 patients<br>(1 RCT) <sup>A</sup> |
| <b>Total wake time</b><br>[Actigraphy]        | ⊕⊕○○<br><b>LOW</b> <sup>a,b</sup>     | The mean difference in the Sleep hygiene group was 18.3 minutes lower <sup>2</sup> [54.72 mins lower to 18.12 mins higher] compared to control  | 26 patients<br>(1 RCT) <sup>A</sup> |
| <b>Total sleep time</b><br>[Diary]            | ⊕⊕○○<br><b>LOW</b> <sup>a,b</sup>     | The mean difference in the Sleep hygiene group was 7.7 minutes lower <sup>2</sup> [53.78 mins lower to 38.38 mins higher] compared to control   | 26 patients<br>(1 RCT) <sup>A</sup> |
| <b>Total sleep time</b><br>[Actigraphy]       | ⊕⊕○○<br><b>LOW</b> <sup>a,b</sup>     | The mean difference in the Sleep hygiene group was 7.1 minutes lower <sup>2</sup> [63.74 mins lower to 49.54 mins higher] compared to control   | 26 patients<br>(1 RCT) <sup>A</sup> |

\* Critical Outcome

<sup>a</sup> 95% CI crosses clinical significance threshold and/or <200 participants

<sup>b</sup> Risk of bias [no patient blinding, allocation concealment]

<sup>1</sup> Meets the clinical significance threshold

<sup>2</sup> Does not meet the clinical significance threshold

## Biofeedback

### Sleep latency

**Table S85.** Diary-determined sleep latency (minutes), post treatment differences, biofeedback vs. control

| Study         | Delivery method                | Biofeedback |       |       | Control |       |       | Mean Difference, [95% CI] |
|---------------|--------------------------------|-------------|-------|-------|---------|-------|-------|---------------------------|
|               |                                | Mean        | SD    | Total | Mean    | SD    | Total |                           |
| Nicassio 1982 | In-person, one-on-one delivery | 31.32       | 12.73 | 10    | 83.9    | 46.96 | 10    | -52.58 [-82.74, -22.42]   |

**Table S86.** Summary of findings table for biofeedback for the psychological and behavioral treatment of insomnia in adults

References: Nicassio 1982 (A)

| Outcomes [Tool]        | Quality of the evidence (GRADE) | Absolute Difference<br>CBTI vs Control                                                                                                | No of Participants (studies)     |
|------------------------|---------------------------------|---------------------------------------------------------------------------------------------------------------------------------------|----------------------------------|
| Sleep latency* [Diary] | ⊕⊕○○<br>LOW <sup>a,b</sup>      | The mean difference in the Biofeedback group was 52.58 minutes lower <sup>1</sup> [22.42 min to 82.74 mins lower] compared to control | 20 patients (1 RCT) <sup>A</sup> |

\* Critical Outcome

<sup>a</sup> <200 participants

<sup>b</sup> Risk of bias [no patient blinding and selective outcome reporting]

<sup>1</sup> Meets the clinical significance threshold<sup>2</sup> Does not meet the clinical significance threshold

## Paradoxical Intention

### Sleep latency

**Table S87.** Diary-determined sleep latency (minutes), post treatment differences, paradoxical intention vs. control

| Study       | Delivery method                | Paradoxical Intention |       |       | Control |       |       | Mean Difference, [95% CI] |
|-------------|--------------------------------|-----------------------|-------|-------|---------|-------|-------|---------------------------|
|             |                                | Mean                  | SD    | Total | Mean    | SD    | Total |                           |
| Ascher 1978 | In-person, one-on-one delivery | 28.63                 | 16.64 | 8     | 56.88   | 34.06 | 17    | -28.25[-48.13, -8.37]     |
| Lacks1983   | Group delivery                 | 52.5                  | 21.93 | 14    | 53.88   | 28.61 | 16    | -1.38 [-19.50, 16.74]     |

\*Ascher 1978 (control and waitlist pooled data)

### Number of awakenings

**Table S88.** Diary-determined number of awakenings (no./night), post treatment differences, paradoxical intention vs. control

| Study       | Delivery method                | Paradoxical Intention |      |       | Control |      |       | Mean Difference, [95% CI] |
|-------------|--------------------------------|-----------------------|------|-------|---------|------|-------|---------------------------|
|             |                                | Mean                  | SD   | Total | Mean    | SD   | Total |                           |
| Ascher 1978 | In-person, one-on-one delivery | 0.5                   | 0.54 | 8     | 1.25    | 0.71 | 9     | -0.75[-1.35, -0.15]       |

**Table S89.** Summary of findings table for paradoxical intention for the psychological and behavioral treatment of insomnia in adults

| References: Ascher 1978 (A); Lacks 1983 (B) |                                          |                                                                                                                                                        |                                    |
|---------------------------------------------|------------------------------------------|--------------------------------------------------------------------------------------------------------------------------------------------------------|------------------------------------|
| Outcomes [Tool]                             | Quality of the evidence (GRADE)          | Absolute Difference<br>PI vs Control                                                                                                                   | No of Participants (studies)       |
| <b>Sleep latency*</b><br>[Diary]            | ⊕○○○<br><b>VERY LOW</b> <sup>a,b,c</sup> | The mean difference in the Paradoxical intention group was 18.31 minutes lower <sup>2</sup> [40.36 mins lower to 3.74 mins higher] compared to control | 55 patients (2 RCT) <sup>A,B</sup> |
| <b>Number of awakenings</b><br>[Diary]      | ⊕⊕○○<br><b>LOW</b> <sup>a,b</sup>        | The mean difference in the Paradoxical intention group was 0.75 points lower <sup>2</sup> [0.15 points to 1.35 points lower] compared to control       | 17 patients (1 RCT) <sup>A</sup>   |

\* Critical Outcome

<sup>a</sup> 95% CI crosses clinical significance threshold and/or <200 participants

<sup>b</sup> Risk of bias [no patient blinding, allocation concealment]

<sup>c</sup> Inconsistency

<sup>1</sup> Meets the clinical significance threshold

<sup>2</sup> Does not meet the clinical significance threshold



## Intensive Sleep Retraining (ISR)

### Quality of sleep

**Table S90.** PSQI-determined sleep quality, post treatment differences, ISR vs. control

| Study       | Delivery method    | ISR  |      |       | Control |      |       | Std. Mean Difference, [95% CI] |
|-------------|--------------------|------|------|-------|---------|------|-------|--------------------------------|
|             |                    | Mean | SD   | Total | Mean    | SD   | Total |                                |
| Harris 2012 | In-person delivery | 8.88 | 3.05 | 16    | 11.11   | 2.72 | 19    | -0.76 [-1.45, -0.07]           |

### Sleep latency

**Table S91.** Diary-determined sleep latency (minutes), post treatment differences, ISR vs. control

| Study       | Delivery method    | ISR   |       |       | Control |       |       | Mean Difference, [95% CI] |
|-------------|--------------------|-------|-------|-------|---------|-------|-------|---------------------------|
|             |                    | Mean  | SD    | Total | Mean    | SD    | Total |                           |
| Harris 2012 | In-person delivery | 38.41 | 16.24 | 16    | 68.65   | 37.72 | 19    | -30.24 [-48.97, -11.51]   |

### Wake after sleep onset

**Table S92.** Diary-determined WASO (minutes), post treatment differences, ISR vs. control

| Study       | Delivery method    | ISR   |       |       | Control |       |       | Mean Difference, [95% CI] |
|-------------|--------------------|-------|-------|-------|---------|-------|-------|---------------------------|
|             |                    | Mean  | SD    | Total | Mean    | SD    | Total |                           |
| Harris 2012 | In-person delivery | 60.71 | 59.01 | 16    | 80.31   | 57.38 | 19    | -19.60 [-58.35, 19.15]    |

### Sleep efficiency

**Table S93.** Diary-determined sleep efficiency (%), post treatment differences, ISR vs. control

| Study       | Delivery method    | ISR   |      |       | Control |       |       | Mean Difference, [95% CI] |
|-------------|--------------------|-------|------|-------|---------|-------|-------|---------------------------|
|             |                    | Mean  | SD   | Total | Mean    | SD    | Total |                           |
| Harris 2012 | In-person delivery | 79.85 | 8.84 | 16    | 68.24   | 14.14 | 18    | 11.61 [3.77, 19.45]       |

**Table S94.** Actigraphy-determined sleep efficiency (%), post treatment differences, ISR vs. control

| Study       | Delivery method    | ISR   |       |       | Control |       |       | Mean Difference, [95% CI] |
|-------------|--------------------|-------|-------|-------|---------|-------|-------|---------------------------|
|             |                    | Mean  | SD    | Total | Mean    | SD    | Total |                           |
| Harris 2012 | In-person delivery | 76.57 | 11.91 | 16    | 71.92   | 11.91 | 18    | 4.65 [-3.37, 12.67]       |

### Total sleep time

**Table S95.** Diary-determined total sleep time (minutes), post treatment differences, ISR vs. control

| Study       | Delivery method    | ISR    |       |       | Control |       |       | Mean Difference, [95% CI] |
|-------------|--------------------|--------|-------|-------|---------|-------|-------|---------------------------|
|             |                    | Mean   | SD    | Total | Mean    | SD    | Total |                           |
| Harris 2012 | In-person delivery | 403.23 | 55.37 | 16    | 350.26  | 76.76 | 18    | 52.97 [8.32, 97.62]       |

**Table S96.** Actigraphy-determined total sleep time (minutes), post treatment differences, ISR vs. control

| Study       | Delivery method    | ISR    |       |       | Control |       |       | Mean Difference, [95% CI] |
|-------------|--------------------|--------|-------|-------|---------|-------|-------|---------------------------|
|             |                    | Mean   | SD    | Total | Mean    | SD    | Total |                           |
| Harris 2012 | In-person delivery | 392.28 | 62.54 | 16    | 368.5   | 72.74 | 18    | 23.78 [-21.70, 69.26]     |

**Table S97.** Summary of findings table for ISR for the psychological and behavioral treatment of insomnia in adults

References: Harris 2012 (A)

| Outcomes [Tool]                 | Quality of the evidence (GRADE) | Absolute Difference                                                                                                                         |                                  |
|---------------------------------|---------------------------------|---------------------------------------------------------------------------------------------------------------------------------------------|----------------------------------|
|                                 |                                 | ISR vs Control                                                                                                                              | No of Participants (studies)     |
| Quality of sleep [PSQI]         | ⊕⊕○○<br>LOW <sup>a,b</sup>      | The standardized mean difference in the ISR group was 0.76 points lower <sup>1</sup> [0.07 points to 1.45 points lower] compared to control | 35 patients (1 RCT) <sup>A</sup> |
| Sleep latency* [Diary]          | ⊕⊕○○<br>LOW <sup>a,b</sup>      | The mean difference in the ISR group was 30.24 minutes lower <sup>1</sup> [11.51 min to 48.97 mins lower] compared to control               | 35 patients (1 RCT) <sup>A</sup> |
| Wake after sleep onset* [Diary] | ⊕⊕○○<br>LOW <sup>a,b</sup>      | The mean difference in the ISR group was 19.60 minutes lower <sup>2</sup> [58.35 mins lower to 19.15 mins higher] compared to control       | 35 patients (1 RCT) <sup>A</sup> |
| Sleep efficiency [Diary]        | ⊕⊕○○<br>LOW <sup>a,b</sup>      | The mean difference in the ISR group was 11.61% higher <sup>1</sup> [3.77 to 19.45% higher] compared to control                             | 34 patients (1 RCT) <sup>A</sup> |
| Sleep efficiency [Actigraphy]   | ⊕⊕○○<br>LOW <sup>a,b</sup>      | The mean difference in the ISR group was 4.65% higher <sup>2</sup> [3.37% lower to 12.67% higher] compared to control                       | 34 patients (1 RCT) <sup>A</sup> |
| Total sleep time [Diary]        | ⊕⊕○○<br>LOW <sup>a,b</sup>      | The mean difference in the ISR group was 52.97 minutes higher <sup>1</sup> [8.32 to 97.62 mins higher] compared to control                  | 34 patients (1 RCT) <sup>A</sup> |
| Total sleep time [Actigraphy]   | ⊕⊕○○<br>LOW <sup>a,b</sup>      | The mean difference in the ISR group was 23.78 minutes higher <sup>1</sup> [21.70 mins lower to 69.26 mins higher] compared to control      | 34 patients (1 RCT) <sup>A</sup> |

\* Critical Outcome

<sup>a</sup> 95% CI crosses clinical significance threshold and/or <200 participants

<sup>b</sup> Risk of bias [no patient blinding, allocation concealment]

<sup>1</sup> Meets the clinical significance threshold

<sup>2</sup> Does not meet the clinical significance threshold

## Mindfulness

### Quality of sleep

**Table S98.** PSQI-determined quality of sleep, post treatment differences, mindfulness vs. control

| Study      | Delivery method | Mindfulness |      |       | Control |      |       | Std. Mean Difference, [95% CI] |
|------------|-----------------|-------------|------|-------|---------|------|-------|--------------------------------|
|            |                 | Mean        | SD   | Total | Mean    | SD   | Total |                                |
| Zhang 2015 | Group delivery  | 8.17        | 2.61 | 30    | 11.47   | 3.58 | 30    | -1.04[-1.58, -0.50]            |

### Sleep latency

**Table S99.** Diary-determined sleep latency (minutes), post treatment differences, mindfulness vs. control

| Study     | Delivery method | Mindfulness |      |       | Control |      |       | Mean Difference, [95% CI] |
|-----------|-----------------|-------------|------|-------|---------|------|-------|---------------------------|
|           |                 | Mean        | SD   | Total | Mean    | SD   | Total |                           |
| Wong 2017 | Group delivery  | 48.6        | 30.7 | 111   | 52.4    | 53.5 | 105   | -3.80[-15.52, 7.92]       |

### Wake after sleep onset

**Table S100.** Diary-determined WASO (minutes), post treatment differences, mindfulness vs. control

| Study     | Delivery method | Mindfulness |      |       | Control |      |       | Mean Difference, [95% CI] |
|-----------|-----------------|-------------|------|-------|---------|------|-------|---------------------------|
|           |                 | Mean        | SD   | Total | Mean    | SD   | Total |                           |
| Wong 2017 | Group delivery  | 57.7        | 52.6 | 111   | 67.7    | 68.5 | 105   | -10.00[-26.35, 6.35]      |

### Remission rate

**Table S101.** ISI-determined remission rate (%), post treatment differences, mindfulness vs. control

| Study    | Delivery method | Mindfulness |       | Control |       | Risk Difference [95% CI] |
|----------|-----------------|-------------|-------|---------|-------|--------------------------|
|          |                 | Events      | Total | Events  | Total |                          |
| Ong 2014 | Group delivery  | 8           | 19    | 1       | 16    | 0.36[0.11, 0.61]         |

### Insomnia severity

**Table S102.** ISI-determined insomnia severity, post treatment differences, mindfulness vs. control

| Study     | Delivery method       | Mindfulness |     |       | Control |     |       | Std. Mean Difference, [95% CI] |
|-----------|-----------------------|-------------|-----|-------|---------|-----|-------|--------------------------------|
|           |                       | Mean        | SD  | Total | Mean    | SD  | Total |                                |
| Ong 2014  | Group delivery        | 10.27       | 4.7 | 19    | 15.5    | 5.5 | 16    | -1.01[-1.72, -0.30]            |
| Wong 2017 | In-person, one-on-one | 14.1        | 4   | 111   | 14.9    | 4.7 | 105   | -0.18[-0.45, 0.08]             |

## Sleep efficiency

**Table S103.** Diary-determined sleep efficiency (%), post treatment differences, mindfulness vs. control

| Study     | Delivery method       | Mindfulness |      |       | Control |      |       | Mean Difference, [95% CI] |
|-----------|-----------------------|-------------|------|-------|---------|------|-------|---------------------------|
|           |                       | Mean        | SD   | Total | Mean    | SD   | Total |                           |
| Ong 2014  | Group delivery        | 83.79       | 8.22 | 19    | 80.76   | 13.6 | 16    | 3.03[-4.59, 10.65]        |
| Wong 2017 | In-person, one-on-one | 68.5        | 14.1 | 111   | 68.4    | 16.3 | 105   | 0.10[-3.97, 4.17]         |

**Table S104.** Actigraphy-determined sleep efficiency (%), post treatment differences, mindfulness vs. control

| Study    | Delivery method | Mindfulness |      |       | Control |      |       | Mean Difference, [95% CI] |
|----------|-----------------|-------------|------|-------|---------|------|-------|---------------------------|
|          |                 | Mean        | SD   | Total | Mean    | SD   | Total |                           |
| Ong 2014 | Group delivery  | 81.78       | 8.95 | 19    | 83.53   | 4.88 | 16    | -1.75[-6.43, 2.93]        |

**Table S105.** PSG-determined sleep efficiency (%), post treatment differences, mindfulness vs. control

| Study    | Delivery method | Mindfulness |       |       | Control |      |       | Mean Difference, [95% CI] |
|----------|-----------------|-------------|-------|-------|---------|------|-------|---------------------------|
|          |                 | Mean        | SD    | Total | Mean    | SD   | Total |                           |
| Ong 2014 | Group delivery  | 83.24       | 10.71 | 19    | 85.19   | 6.79 | 16    | -1.95[-7.80, 3.90]        |

## Total wake time

**Table S106.** Diary-determined total wake time (minutes), post treatment differences, mindfulness vs. control

| Study    | Delivery method | Mindfulness |       |       | Control |       |       | Mean Difference, [95% CI] |
|----------|-----------------|-------------|-------|-------|---------|-------|-------|---------------------------|
|          |                 | Mean        | SD    | Total | Mean    | SD    | Total |                           |
| Ong 2014 | Group delivery  | 73.47       | 34.69 | 19    | 85.71   | 72.08 | 16    | -12.24[-50.85, 26.37]     |

**Table S107.** Actigraphy-determined total wake time (minutes), post treatment differences, mindfulness vs. control

| Study    | Delivery method | Mindfulness |       |       | Control |       |       | Mean Difference, [95% CI] |
|----------|-----------------|-------------|-------|-------|---------|-------|-------|---------------------------|
|          |                 | Mean        | SD    | Total | Mean    | SD    | Total |                           |
| Ong 2014 | Group delivery  | 61.46       | 25.15 | 19    | 61.44   | 22.48 | 16    | 0.02[-15.77, 15.81]       |

**Table S108.** PSG-determined total wake time (minutes), post treatment differences, mindfulness vs. control

| Study    | Delivery method | Mindfulness |       |       | Control |       |       | Mean Difference, [95% CI] |
|----------|-----------------|-------------|-------|-------|---------|-------|-------|---------------------------|
|          |                 | Mean        | SD    | Total | Mean    | SD    | Total |                           |
| Ong 2014 | Group delivery  | 78.01       | 53.93 | 19    | 69.81   | 30.94 | 16    | 8.20[-20.40, 36.80]       |

## Total sleep time

**Table S109.** Diary-determined total sleep time (minutes), post treatment differences, mindfulness vs. control

| Study     | Delivery method       | Mindfulness |       |       | Control |       |       | Mean Difference, [95% CI] |
|-----------|-----------------------|-------------|-------|-------|---------|-------|-------|---------------------------|
|           |                       | Mean        | SD    | Total | Mean    | SD    | Total |                           |
| Ong 2014  | Group delivery        | 379.31      | 64.32 | 19    | 364.82  | 83.13 | 16    | 14.49[-35.47, 64.45]      |
| Wong 2017 | In-person, one-on-one | 318.4       | 66.2  | 111   | 317.1   | 76.6  | 105   | 1.30[-17.84, 20.44]       |

**Table S110.** Actigraphy-determined total sleep time (minutes), post treatment differences, mindfulness vs. control

| Study    | Delivery method | Mindfulness |       |       | Control |       |       | Mean Difference, [95% CI] |
|----------|-----------------|-------------|-------|-------|---------|-------|-------|---------------------------|
|          |                 | Mean        | SD    | Total | Mean    | SD    | Total |                           |
| Ong 2014 | Group delivery  | 364.85      | 47.68 | 19    | 376.58  | 63.03 | 16    | -11.73[-49.33, 25.87]     |

**Table S111.** PSG-determined total sleep time (minutes), post treatment differences, mindfulness vs. control

| Study    | Delivery method | Mindfulness |       |       | Control |       |       | Mean Difference, [95% CI] |
|----------|-----------------|-------------|-------|-------|---------|-------|-------|---------------------------|
|          |                 | Mean        | SD    | Total | Mean    | SD    | Total |                           |
| Ong 2014 | Group delivery  | 380.84      | 52.25 | 19    | 403.66  | 39.94 | 16    | -22.82[-53.40, 7.76]      |

**Table S112.** Summary of findings table for mindfulness for the psychological and behavioral treatment of insomnia in adults

References: Zhang 2015 (A); Ong 2014 (B), Wong 2017 (C)

| Outcomes [Tool]                | Quality of the evidence (GRADE)     | Absolute Difference                                                                                                                                        |  | No of Participants (studies)        |
|--------------------------------|-------------------------------------|------------------------------------------------------------------------------------------------------------------------------------------------------------|--|-------------------------------------|
|                                |                                     | Mindfulness vs Control                                                                                                                                     |  |                                     |
| Quality of sleep [PSQI]        | ⊕⊕○○<br>LOW <sup>a,b</sup>          | The standardized mean difference in the Mindfulness group was 1.04 points lower <sup>1</sup> [0.50 to 1.58 points lower] compared to control               |  | 60 patients (1 RCT) <sup>A</sup>    |
| *Sleep latency [Diary]         | ⊕⊕○○<br>LOW <sup>b,c</sup>          | The mean difference in the Mindfulness group was 3.80 mins lower <sup>2</sup> [15.52 mins lower to 7.92 mins higher] compared to control                   |  | 216 patients (1 RCT) <sup>C</sup>   |
| Wake after sleep onset [Diary] | ⊕⊕○○<br>LOW <sup>b,c</sup>          | The mean difference in the Mindfulness group was 10.00 mins lower <sup>2</sup> [26.35 mins lower to 6.35 mins higher] compared to control                  |  | 216 patients (1 RCT) <sup>C</sup>   |
| *Remission rate [ISI]          | ⊕⊕○○<br>LOW <sup>a,b</sup>          | The percentage of patients achieving "remission" in the CBTI group was 36% higher <sup>1</sup> [11% to 61% higher] compared to control                     |  | 35 patients (1 RCT) <sup>B</sup>    |
| Insomnia severity [ISI]        | ⊕⊕○○<br>LOW <sup>a,b,c</sup>        | The standardized mean difference in the mindfulness group was 0.53 points lower <sup>1</sup> [1.32 points lower to 0.27 points higher] compared to control |  | 251 patients (2 RCT) <sup>B,C</sup> |
| Sleep efficiency [Diary]       | ⊕⊕○○<br>LOW <sup>a,b,c</sup>        | The mean difference in the Mindfulness group was 0.75% higher <sup>2</sup> [2.84% lower to 4.34% higher] compared to control                               |  | 251 patients (2 RCT) <sup>B,C</sup> |
| Sleep efficiency [Act]         | ⊕⊕○○<br>LOW <sup>a,b,c</sup>        | The mean difference in the Mindfulness group was 1.75% lower <sup>2</sup> [6.43% lower to 2.93% higher] compared to control                                |  | 35 patients (1 RCT) <sup>B</sup>    |
| Sleep efficiency [PSG]         | ⊕⊕○○<br>LOW <sup>a,b,c</sup>        | The mean difference in the Mindfulness group was 1.95% lower <sup>2</sup> [7.8% lower to 3.9% higher] compared to control                                  |  | 35 patients (1 RCT) <sup>B</sup>    |
| Total wake time [Diary]        | ⊕⊕○○<br>LOW <sup>a,b,c</sup>        | The mean difference in the Mindfulness group was 12.24 minutes lower <sup>2</sup> [50.85 minutes lower to 26.37 minutes higher] compared to control        |  | 35 patients (1 RCT) <sup>B</sup>    |
| Total wake time [Act]          | ⊕⊕○○<br>LOW <sup>a,b,c</sup>        | The mean difference in the Mindfulness group was 0.02 minutes lower <sup>2</sup> [15.77 minutes lower to 15.81 minutes higher] compared to control         |  | 35 patients (1 RCT) <sup>B</sup>    |
| Total wake time [PSG]          | ⊕⊕○○<br>LOW <sup>a,b,c</sup>        | The mean difference in the Mindfulness group was 8.2 minutes lower <sup>2</sup> [20.40 minutes lower to 36.80 minutes higher] compared to control          |  | 35 patients (1 RCT) <sup>B</sup>    |
| Total sleep time [Diary]       | ⊕○○○<br>VERY LOW <sup>a,b,c,d</sup> | The mean difference in the Mindfulness group was 2.99 minutes higher <sup>2</sup> [14.88 minutes lower to 20.86 minutes higher] compared to control        |  | 251 patients (2 RCT) <sup>B,C</sup> |
| Total sleep time [Act]         | ⊕○○○<br>VERY LOW <sup>a,b,c,d</sup> | The mean difference in the Mindfulness group was 11.73 minutes lower <sup>2</sup> [49.33 minutes lower to 25.87 minutes higher] compared to control        |  | 35 patients (1 RCT) <sup>B</sup>    |
| Total sleep time [PSG]         | ⊕⊕○○<br>LOW <sup>a,b,c</sup>        | The mean difference in the Mindfulness group was 22.82 minutes lower <sup>2</sup> [53.40 minutes lower to 7.76 minutes higher] compared to control         |  | 35 patients (1 RCT) <sup>B</sup>    |

\* Critical Outcome

a. <200 participants

b. Risk of bias [no patient blinding, allocation concealment]

c. Imprecision

d. Crosses CI on both sides

<sup>1</sup> Meets the clinical significance threshold

<sup>2</sup> Does not meet the clinical significance threshold

| Study Name          | Gender      | Age                    | Intervention                                                                            | Control                                | Delivery method                      | Type of insomnia              | Specific group (Older adults, veterans) | Treatment delivered by clinician, nurse etc.                                                                                                                                                                                                                        | Component of sleep hygiene included in multicomponent intervention (Y/N) | Duration of session/intervention (no. of sessions)             | Included in the meta-analysis Y/N | Reason for not including in meta-analyses        |
|---------------------|-------------|------------------------|-----------------------------------------------------------------------------------------|----------------------------------------|--------------------------------------|-------------------------------|-----------------------------------------|---------------------------------------------------------------------------------------------------------------------------------------------------------------------------------------------------------------------------------------------------------------------|--------------------------------------------------------------------------|----------------------------------------------------------------|-----------------------------------|--------------------------------------------------|
| Arnedt 2013         | 3 M, 27F    | 39.1                   | CBT-I                                                                                   | information pamphlet                   | Telephone                            | Mixed                         | -                                       | experienced therapists                                                                                                                                                                                                                                              | Y                                                                        | 8 sessions                                                     | Y                                 | -                                                |
| Ascher 1978         | 10M, 15F    | 39                     | Paradoxical intention                                                                   | placebo<br>no treatment                | in-person                            | Mixed                         | -                                       | -                                                                                                                                                                                                                                                                   | -                                                                        | 4 weekly sessions                                              | Y                                 | -                                                |
| Bastein 2004        | 16M, 29F    | 41.8                   | CBT-I                                                                                   | in-person                              | Group<br>Telephone                   | Mixed                         | -                                       | The therapists (4 female and 1 male) were certified clinical psychologists or doctoral students in psychology with prior clinical experience.                                                                                                                       | Y                                                                        | 8 weekly sessions                                              | Y                                 | -                                                |
| Batterham 2017      | 299M, 850F  | 43                     | CBT-I                                                                                   | internet control                       | internet                             | Insomnia with comorbidities   | subclinical depression symptoms         | SHUTi, no live interaction                                                                                                                                                                                                                                          | Y                                                                        | 6 weekly sessions                                              | N                                 | adjusted data                                    |
| Bjorvatn 2011       | 65M, 90F    | 49.9                   | CBT-I                                                                                   | sleep hygiene                          | self-help                            | Mixed                         | -                                       | Self-help book                                                                                                                                                                                                                                                      | Y                                                                        | 3 months                                                       | Y                                 | -                                                |
| Bjorvatn 2018       | 116M, 48F   | 56                     | CBT-I                                                                                   | sleep hygiene                          | self-help                            | Insomnia with comorbidities   | diagnosed with OSA                      | Self-help book                                                                                                                                                                                                                                                      | Y                                                                        | 3 months                                                       | Y                                 | -                                                |
| Blom 2016           | 32M, 116F   | 48                     | CBT-I                                                                                   | internet control                       | internet                             | Insomnia with comorbidities   | -                                       | final year of a 5-y Master of Science university program for clinical psychologists participated in the study.                                                                                                                                                      | Y                                                                        | 8 weeks treatment period                                       | Y                                 | -                                                |
| Bothelius 2013      | 9M, 55F     | 50.7                   | CBT-I                                                                                   | waitlist                               | Group                                | Mixed                         | -                                       | Treatment was delivered by four primary health-care nurses and one social worker, with 2 days of training in how to use the manual. The personnel volunteering had no formal training in sleep medicine, but all of them had relatively solid training in CBT.      | Y                                                                        | 5 sessions                                                     | Y                                 | -                                                |
| Buysse 2011         | 22M, 54F    | 71.7                   | BBT-I                                                                                   | information control                    | in-person                            | Mixed                         | Older adults                            | Nurse clinician                                                                                                                                                                                                                                                     | Y                                                                        | 2 sessions + 2 telephone calls                                 | Y                                 | -                                                |
| Cape 2016           | 143 F, 96 M | 59.8                   | CBT-I                                                                                   | Usual care                             | Group                                | Insomnia with comorbidities   | -                                       | Each group was facilitated by two IAPT psychological wellbeing practitioners, recent graduates, most but not all with psychology undergraduate degrees, who had undertaken a 1-year 1 day per week certificate course in low-intensity psychological interventions. | Y                                                                        | 5 sessions                                                     | N                                 | adjusted data                                    |
| Chen 2008           | 15M, 11F    | 50.3                   | CBT-I                                                                                   | sleep hygiene                          | group                                | Insomnia with comorbidities   | Patients undergoing peritoneal dialysis | Psychiatrist                                                                                                                                                                                                                                                        | Y                                                                        | 4 weeks                                                        | N                                 | Data presented as median and interquartile range |
| Creti 2005          | 13M, 28F    | 67                     | Relaxation therapy (progressive muscle relaxation, only the relaxation aspect included) | waitlist                               | audio                                | Insomnia and no comorbidities | Older adults (55 and older)             | audio tapes                                                                                                                                                                                                                                                         | -                                                                        | 2 weeks                                                        | Y                                 | -                                                |
| Currie 2000         | 27M, 33F    | 45                     | CBT-I                                                                                   | waitlist                               | Group                                | Insomnia with comorbidities   | Chronic pain                            | Each therapy group was led by a primary therapist and a cotherapist. The therapists were six doctoral students or interns in clinical psychology, all of whom had some previous training in CBT interventions                                                       | Y                                                                        | 7 sessions                                                     | Y                                 | -                                                |
| Currie 2004         | 42 M 18 F   | 43.3                   | CBT-I                                                                                   | waitlist                               | in-person (one-on-one )<br>self-help | Insomnia with comorbidities   | Alcoholics                              | Three mental health professionals (a PhD psychologist, a master's level social worker and an addiction counsellor) served as therapists for the IT and SHTS conditions                                                                                              | Y                                                                        | 5 sessions                                                     | Y                                 | -                                                |
| Dirksen 2007        | 72F         | 58.2                   | CBT-I                                                                                   | sleep hygiene                          | group                                | Insomnia with comorbidities   | Breast cancer survivors                 | Master's level Registered Nurse therapist                                                                                                                                                                                                                           | Y                                                                        | 4 weekly sessions + 2 telephone calls                          | Y                                 | -                                                |
| Drake 2019          | 150 F       | 56.44                  | CBT-I                                                                                   | sleep hygiene                          | in-person (one-on-one )              | Mixed                         | Postmenopausal women                    | registered nurse who specializes in behavioral sleep medicine.                                                                                                                                                                                                      | Y                                                                        | 6 sessions                                                     | Y                                 | -                                                |
| Drake 2019          | 150 F       | 56.44                  | Sleep restriction                                                                       | sleep hygiene                          | in-person                            | Mixed                         | Postmenopausal women                    | registered nurse who specializes in behavioral sleep medicine.                                                                                                                                                                                                      | -                                                                        | 2 weeks                                                        | Y                                 | -                                                |
| Edinger 2001        | 40 M, 35 F  | 55.3                   | CBT-I, Relaxation therapy                                                               | placebo therapy (quasidesensitization) | in-person (one-on-one )              | Insomnia and no comorbidities | -                                       | One male and one female therapist, beginning- level clinical psychologist, naive to behavioral insomnia therapy.                                                                                                                                                    | Y                                                                        | 6 sessions                                                     | N                                 | adjusted data                                    |
| Edinger 2003        | 18 M, 2 F   | 51                     | BBT-I                                                                                   | sleep hygiene                          | in-person                            | Mixed                         | Veterans                                | beginning-level clinical psychologist                                                                                                                                                                                                                               | Y                                                                        | 2 sessions                                                     | N                                 | Adjusted data                                    |
| Edinger 2005        | 2 M, 45 F   | 48.6                   | CBT-I                                                                                   | sleep hygiene, usual care              | in-person (one-on-one )              | Insomnia with comorbidities   | Fibromyalgia                            | 2 licensed male clinical psychologists                                                                                                                                                                                                                              | N                                                                        | 6 sessions                                                     | Y                                 | -                                                |
| Edinger 2005        | 2M, 45 F    | 48.3                   | Sleep hygiene                                                                           | Usual care                             | in-person                            | Insomnia with comorbidities   | Fibromyalgia                            | Two licensed male clinical psychologists                                                                                                                                                                                                                            | Y                                                                        | 6 weekly individual session                                    | Y                                 | -                                                |
| Edinger 2007        | 43M, 43F    | 55.4                   | CBT-I                                                                                   | waitlist                               | in-person (one-on-one )              | Insomnia and no comorbidities | -                                       | Two licensed male clinical psychologists                                                                                                                                                                                                                            | Y                                                                        | ranged 1-8 sessions                                            | Y                                 | -                                                |
| Edinger 2009        | 70M, 11 F   | 54.2                   | CBT-I                                                                                   | sleep hygiene                          | in-person (one-on-one )              | Insomnia and no comorbidities | -                                       | 2 licensed clinical psychologists                                                                                                                                                                                                                                   | N                                                                        | 4 sessions                                                     | Y                                 | -                                                |
| Ellis 2015          | 18M, 22F    | 32.9                   | CBT-I                                                                                   | waitlist                               | in-person (one-on-one )              | Mixed                         | -                                       | a practicing health psychologist and somnologist with 5 years' experience delivering CBT-I                                                                                                                                                                          | Y                                                                        | 1 session                                                      | Y                                 | -                                                |
| Engle-Friedman 1992 | 18M, 35F    | 61.4<br>57.56<br>60.26 | Sleep hygiene<br>Stimulus control<br>Relaxation therapy (progressive relaxation)        | measurement control group              | in-person                            | Mixed                         | Older adults                            | Graduate students                                                                                                                                                                                                                                                   | Y                                                                        | 5 weeks                                                        | N                                 | Mean and SD not provided                         |
| Epstein 2007        | All Females | 57.1, 59.1             | CBT-I                                                                                   | sleep hygiene                          | Group/telehealth                     | Insomnia with comorbidities   | Breast cancer survivors                 | The therapist was a master's-level clinical nurse specialist in psychiatric-mental health nursing. She was trained in the delivery of the intervention as part of another study and had four years of experience in delivering the intervention in another study    | Y                                                                        | 4 session (in-person group) +2 (individual telephone) sessions | Y                                 | -                                                |

|                                             |                        |              |                                                                   |                                              |                               |                                         |                                                  |                                                                                                                                                                                                                                                                                       |               |                                                      |   |                                                                                                                  |
|---------------------------------------------|------------------------|--------------|-------------------------------------------------------------------|----------------------------------------------|-------------------------------|-----------------------------------------|--------------------------------------------------|---------------------------------------------------------------------------------------------------------------------------------------------------------------------------------------------------------------------------------------------------------------------------------------|---------------|------------------------------------------------------|---|------------------------------------------------------------------------------------------------------------------|
| Epstein 2012                                | 64M, 115F              | 68.9         | CBT-I<br>Sleep restriction<br>Stimulus control                    | waitlist                                     | Group                         | Insomnia and no comorbidities           | Older adult (55 or older), veterans              | Treatment was implemented by a masters' level psychiatric-mental health clinical nurse specialist, with some substitution for vacations and illness by a PhD level nurse (DRE) with the same clinical background. The master's level nurse was an experienced mental health therapist | Y in CBT-I    | 4 sessions (individual sessions)+ 2 sessions (phone) | N | Adjusted data                                                                                                    |
| Epstein 2012                                | 64M, 115F              | 68.9         | Sleep restriction                                                 | waitlist                                     | group/telehealth              | Insomnia and no comorbidities           | Older adults (55 and older)                      | masters' level psychiatric-mental health clinical nurse specialist, with some substitution for vacations and illness by a PhD level nurse (DRE) with the same clinical background                                                                                                     | Y             | 6 weeks (4 week group and 2 weeks over the phone)    | N | adjusted data reported                                                                                           |
| Epstein 2012                                | 13M, 31F               | 70.23        | Stimulus control                                                  | waitlist                                     | group/telehealth              | Insomnia and no comorbidities           | Older adult (55 or older)                        | masters' level psychiatric-mental health clinical nurse specialist, with some substitution for vacations and illness by a PhD level nurse (DRE) with the same clinical background                                                                                                     | -             | 4 week group sessions + 2 week phone sessions        | N | Adjusted data                                                                                                    |
| Espie 1989 (Behaviour Research and Therapy) | 23M, 47F               | 44.9         | Relaxation therapy,<br>Stimulus control,<br>Paradoxical Intention | Placebo,<br>Imagery relief,<br>no treatment, | in-person                     | Mixed                                   | -                                                | The senior author conducted all therapy sessions across treatments.                                                                                                                                                                                                                   | -             | 8 weeks treatment period                             | N | The SD values in the study represent the night to night variability measure, and not the SD for the mean values. |
| Espie 2001                                  | 44M, 95F               | 51           | CBT-I                                                             | waitlist                                     | Group                         | Mixed                                   | -                                                | Six Health Visitors conducted the treatment sessions after extensive training from a Clinical Psychologist, a senior Health Promotion Officer and a Pharmacist                                                                                                                        | Y             | 6 sessions                                           | N | Adjusted data                                                                                                    |
| Espie 2007                                  | 64M, 137F              | 54.3         | CBT-I                                                             | Usual care                                   | Group                         | Mixed                                   | General practice                                 | Trained community nurses to deliver CBT-I, with post-qualification and certification                                                                                                                                                                                                  | Y             | 5 sessions                                           | Y | -                                                                                                                |
| Espie 2008                                  | 103 F only             | 61           | CBT-I                                                             | Usual care                                   | Group                         | Insomnia with comorbidities             | Cancer                                           | trained four experienced cancer nurses, who were released on a part-time basis from oncology nursing duties, to deliver CBT                                                                                                                                                           | N             | 5 sessions                                           | Y | -                                                                                                                |
| Espie 2012                                  | 44M, 120 F             | 49           | CBT-I                                                             | Usual care                                   | internet                      | Mixed                                   | -                                                | an animated "virtual therapist" (The Prof).                                                                                                                                                                                                                                           | Y             | 6 sessions                                           | Y | -                                                                                                                |
| Espie 2019                                  | 382M, 1329F            | 48           | CBT-I                                                             | sleep hygiene                                | internet                      | Insomnia and no comorbidities           | -                                                | Fully automated digital program                                                                                                                                                                                                                                                       | Y             | 6 sessions                                           | Y | -                                                                                                                |
| Fernando 2013                               | 17M, 28F               | 55.5         | Sleep restriction                                                 | sleep hygiene                                | in-person                     | Insomnia and no comorbidities           | -                                                | Primary care clinicians                                                                                                                                                                                                                                                               | Y             | 6 weeks                                              | N | no mean or SD provided, scale was better or much better and same,worse or much worse                             |
| Feuerstein 2017                             | 15M, 19F               | 49           | CBT-I                                                             | sleep hygiene                                | internet                      | Insomnia with psychiatric comorbidities | engaged in mental healthcare treatment           | computer-based                                                                                                                                                                                                                                                                        | not mentioned | 6 sessions                                           | N | data not presented as mean and standard deviation                                                                |
| Fleming 2014                                | 35 M, 78F              | 60.5         | CBT-I                                                             | Usual care                                   | Group                         | Insomnia and no comorbidities           | Cancer                                           | trained four experienced cancer nurses, who were released on a part-time basis from oncology nursing duties, to deliver CBT                                                                                                                                                           | N             | 5 sessions                                           | N | Secondary analysis paper data already included in Espie 2008                                                     |
| Freeman 2015                                | 34 M, 16F              | 40.9 (18-65) | CBT-I                                                             | Usual care                                   | in-person (one-on-one)        | Insomnia with comorbidities             | pts with persistent delusions and hallucinations | Graduate psychologist                                                                                                                                                                                                                                                                 | Y             | 8 sessions                                           | N | adjusted data                                                                                                    |
| Freeman 2017                                | 1043M, 2676F, 36 other | 24.7         | CBT-I                                                             | Usual care                                   | internet                      | Mixed                                   | university student                               | animated therapist, online                                                                                                                                                                                                                                                            | Y             | 6 sessions                                           | N | Post treatment data not presented, only follow up for 10 weeks provided                                          |
| Friedman 2000                               | 13M, 26F               | 64.2         | Sleep restriction                                                 | sleep hygiene                                | in-person                     | Insomnia and no comorbidities           | Older adults (55 and older)                      | Therapist                                                                                                                                                                                                                                                                             | Y             | 4 weeks                                              | Y | -                                                                                                                |
| Germain 2006                                | 10M, 25F               | 70.2         | BBT-I                                                             | information control                          | in-person                     | Mixed                                   | Older adults (65 and above)                      | masters-level adult psychiatric and primary care nurse practitioner                                                                                                                                                                                                                   | Y             | 1 session + booster session 2 weeks later            | Y | -                                                                                                                |
| Germain 2012                                | 45M, 12F               | 40.9         | BBT-I                                                             | pharmacologic placebo                        | group                         | Insomnia and no comorbidities           | Veterans                                         | A masters' level licensed therapist                                                                                                                                                                                                                                                   | Y             | 5 sessions + 3 telephone calls                       | Y | -                                                                                                                |
| Germain 2014                                | 65M, 11F               | 38.4         | BBT-I                                                             | information control                          | in-person                     | Mixed                                   | Veterans                                         | masters' level clinical social worker                                                                                                                                                                                                                                                 | Y             | 2 sessions                                           | Y | -                                                                                                                |
| Greiff 1998                                 | 22M                    | 45.5         | Relaxation therapy                                                | no treatment control                         | in-person                     | Mixed                                   | Chronic alcoholics                               | relaxation training offered by a psychologist                                                                                                                                                                                                                                         | -             | 10 sessions                                          | N | Number of participants not reported                                                                              |
| Hagatun 2019                                | 59M, 122F              | 44.9         | CBT-I                                                             | patient education                            | internet                      | Insomnia and no comorbidities           | -                                                | computer-based                                                                                                                                                                                                                                                                        | Y             | 9 weeks                                              | Y | -                                                                                                                |
| Harris 2012                                 | 15M, 24F               | 41.2         | Intensive sleep retraining                                        | sleep hygiene                                | in-person                     | Insomnia and no comorbidities           | -                                                | in-laboratory ISR was successfully applied                                                                                                                                                                                                                                            | -             | 5 weekly sessions                                    | Y | -                                                                                                                |
| Harris 2012                                 | 23M, 56F               | 40.9         | Stimulus control                                                  | sleep hygiene                                | in-person                     | Insomnia and no comorbidities           | -                                                | The SCT and sleep hygiene treatment components were provided by experienced clinical psychologists                                                                                                                                                                                    | Y             | 5 sessions                                           | Y | -                                                                                                                |
| Harvey 2015                                 | 22 M, 36 F             | 36.6         | CBT-I                                                             | pseudoeducation                              | in-person (one-on-one)        | Insomnia with comorbidities             | Bipolar disorder                                 | administered by doctoral- or master's-level therapists. Weekly supervision was conducted by a licensed clinical psychologist                                                                                                                                                          | Y             | 8 sessions                                           | Y | -                                                                                                                |
| Hauri 1981                                  | 18 M, 30 F             | 41.3         | EMG biofeedback                                                   | control                                      | in-person                     | Insomnia and no comorbidities           | Middle aged                                      | Technician                                                                                                                                                                                                                                                                            | N/A           | 15 sessions                                          | N | SD not provided                                                                                                  |
| Hauri 1997                                  | 7M, 19F                | 47.7         | Sleep hygiene and relaxation therapy                              | waitlist                                     | in-person                     | Insomnia and no comorbidities           | -                                                | Therapist                                                                                                                                                                                                                                                                             | Y             | 6 sessions                                           | N | sleep hygiene and relaxation therapy were combined in the intervention and no sd provided                        |
| Ho 2014                                     | 90M, 222F              | 38.5         | CBT-I                                                             | waitlist                                     | self-help + telephone support | Mixed                                   | -                                                | weekly telephone support from the author (YH), a psychology graduate, using a semi-structured script,                                                                                                                                                                                 | Y             | treatments materials delivered weekly for 6 weeks    | Y | -                                                                                                                |
| Holmqvist 2014                              | 18M, 55F               | -            | CBT-I                                                             | in-person                                    | internet telehealth           | Mixed                                   | -                                                | 3 care providers with 1-5 years of behavioral sleep medicine experience-                                                                                                                                                                                                              | Y             | 6 weeks                                              | Y | -                                                                                                                |
| Horsch 2017                                 | 57M, 94F               | 39.66        | CBT-I                                                             | waitlist                                     | internet (mobile app)         | Mixed                                   | -                                                | -                                                                                                                                                                                                                                                                                     | Y             | 6-7 weeks                                            | Y | -                                                                                                                |
| Hou 2014                                    | 42M, 56F               | 53.45        | CBT-I                                                             | usual care                                   | group                         | Insomnia with comorbidities             | hemodialysis                                     | Physicians                                                                                                                                                                                                                                                                            | N             | 2 weeks                                              | Y | -                                                                                                                |

|                                                     |            |       |                                                            |                                    |                                  |                               |                              |                                                                                                                                                                                                                                                                                                                                                         |   |                                                                                        |   |                                                                                             |
|-----------------------------------------------------|------------|-------|------------------------------------------------------------|------------------------------------|----------------------------------|-------------------------------|------------------------------|---------------------------------------------------------------------------------------------------------------------------------------------------------------------------------------------------------------------------------------------------------------------------------------------------------------------------------------------------------|---|----------------------------------------------------------------------------------------|---|---------------------------------------------------------------------------------------------|
| Hughes 1978                                         | 12 M, 24 F | 34.2  | Relaxation therapy, Stimulus control, Biofeedback training | pseudo-biofeedback                 | in-person                        | Insomnia and no comorbidities | -                            | Three therapists                                                                                                                                                                                                                                                                                                                                        | - | 8 sessions of Biofeedback or pseudobiofeedback<br>4 sessions of RT<br>2 sessions of SC | N | The n's for each group were not reported in the study; unable to calculate mean difference. |
| Irwin 2014                                          | 18M, 57F   | 65.4  | CBT-I                                                      | Sleep education                    | Group                            | Mixed                         | older adults, 55 and older   | Each intervention was taught by one therapist who had at least one year experience in delivery of the treatment modality but no prior experience in sleep medicine, and supervised by another therapist who had extensive (> 10 years) experience in the treatment modality to maintain therapist fidelity in delivery of the treatments as manualized. | Y | 16 sessions (Each participated in 120 minutes of group class time weekly for 4 months) | Y | -                                                                                           |
| Jacobs 2004                                         | 15 M, 33 F | 47.6  | CBT-I                                                      | Placebo tablet                     | in-person (one-on-one)           | Insomnia and no comorbidities | Young and middle aged adults | All treatments were administered based on a structured manual by a predoctoral and postdoctoral psychologist.                                                                                                                                                                                                                                           | Y | 4 sessions (individual sessions)+ 1 (telephone session)                                | Y | -                                                                                           |
| Jansson 2005                                        | 29 M, 105F | 49.5  | CBT-I                                                      | Usual care                         | Group                            | Mixed                         | -                            | therapists were certified cognitive behavior therapists that had received training and guidance in administering this group treatment                                                                                                                                                                                                                   | Y | 6 sessions                                                                             | N | Post treatment data not available, only follow up                                           |
| Jansson-Frojmark 2012 (J Clin Psychol Med Settings) | 12M, 20F   | 55.7  | CBT-I                                                      | waitlist                           | in-person (one-on-one)           | Insomnia with comorbidities   | Hearing impairment, Tinnitus | The three therapists were trained psychologists and had previous experience in working with insomnia patients                                                                                                                                                                                                                                           | Y | 7 sessions                                                                             | Y | -                                                                                           |
| Jernelov 2012                                       | 13M, 76F   | 46.4  | CBT-I                                                      | waitlist                           | self-help (book)                 | Mixed                         | -                            | Therapists (for self-help with telephone support group) in the present study were in their final year of training as clinical psychologists                                                                                                                                                                                                             | Y | 6 telephone sessions                                                                   | Y | -                                                                                           |
| Jungquist 2010                                      | 21 F, 8 M  | 48.7  | CBT-I                                                      | Contact/measurement control        | in-person (one-on-one)           | Insomnia with comorbidities   | Chronic pain                 | Masters prepared nurse therapist                                                                                                                                                                                                                                                                                                                        | Y | 8 sessions                                                                             | Y | -                                                                                           |
| Kaku 2011                                           | 130M, 21F  | 36.2  | CBT-I                                                      | waitlist                           | in-person                        | Mixed                         | -                            | 2 physicians and 2 nurses                                                                                                                                                                                                                                                                                                                               | Y | 30 mins for 20 days                                                                    | Y | -                                                                                           |
| Lacks 1983                                          | 16M, 48F   | 40.6  | Progressive Relaxation therapy                             | placebo                            | group                            | Insomnia and no comorbidities | -                            | Therapists were a male and female graduate student in clinical psychology. They were trained and supervised by an experienced clinician and used detailed treatment manuals to standardize therapy procedures.                                                                                                                                          | - | 4 weekly group sessions                                                                | Y | -                                                                                           |
| Lacks 1983                                          | 16M, 48F   | 40.6  | Paradoxical Intention                                      | placebo                            | group                            | Insomnia and no comorbidities | -                            | Therapists were a male and female graduate student in clinical psychology. They were trained and supervised by an experienced clinician and used detailed treatment manuals to standardize therapy procedures.                                                                                                                                          | Y | 4 weekly group sessions                                                                | Y | -                                                                                           |
| Lacks 1983                                          | 16M, 48F   | 40.6  | Stimulus control                                           | placebo                            | group                            | Insomnia and no comorbidities | -                            | Therapists were a male and female graduate student in clinical psychology. They were trained and supervised by an experienced clinician and used detailed treatment manuals to standardize therapy procedures.                                                                                                                                          | - | 4 weekly sessions                                                                      | Y | -                                                                                           |
| Ladouceur 1986                                      | 9M, 18F    | 41.8  | Paradoxical intention<br>Stimulus control                  | control<br>sleep information       | group                            | Mixed                         | -                            | -                                                                                                                                                                                                                                                                                                                                                       | - | 4 weeks                                                                                | N | No means and standard deviations provided                                                   |
| Lancee 2012                                         | 247M, 434F | 51.8  | CBT-I                                                      | waitlist                           | self-help,<br>internet           | Mixed                         | -                            | -                                                                                                                                                                                                                                                                                                                                                       | Y | 6 weeks intervention                                                                   | Y | -                                                                                           |
| Lancee 2015                                         | 13M, 50F   | 48.73 | CBT-I                                                      | waitlist                           | internet                         | Mixed                         | -                            | -                                                                                                                                                                                                                                                                                                                                                       | Y | 6 weekly sessions                                                                      | Y | -                                                                                           |
| Lancee 2016                                         | 21M, 73F   | 41.6  | CBT-I                                                      | waitlist                           | in-person (one-on-one)<br>online | Mixed                         | -                            | the face-to-face condition, all six individual treatment sessions were administered by a psychologist specialized in insomnia treatment.                                                                                                                                                                                                                | Y | 6 sessions                                                                             | Y | -                                                                                           |
| Lancee 2016                                         | 9M, 51F    | 43.15 | CBT-I                                                      | in-person                          | internet                         | Mixed                         | -                            | -                                                                                                                                                                                                                                                                                                                                                       | - | 6 sessions                                                                             | - | -                                                                                           |
| Lovato 2014                                         | 55M, 127F  | 63.76 | CBT-I                                                      | waitlist                           | Group                            | Insomnia and no comorbidities | Older adults                 | The group sessions were administered by five trainee psychologists (four female, one male) with experience in CBT-I                                                                                                                                                                                                                                     | Y | 4 sessions                                                                             | Y | -                                                                                           |
| Mao 2017                                            | 30M, 74F   | 85.8  | CBT-I                                                      | sleep hygiene                      | self-help                        | Mixed                         | -                            | psychiatrist and a national secondary psychological consultant                                                                                                                                                                                                                                                                                          | Y | 8 weeks                                                                                | Y | -                                                                                           |
| Martinez 2014                                       | 64F        | 47.58 | CBT-I                                                      | sleep hygiene                      | group                            | Insomnia with comorbidities   | Fibromyalgia                 | three female therapists                                                                                                                                                                                                                                                                                                                                 | Y | 6 weekly sessions                                                                      | Y | -                                                                                           |
| Matthews 2014                                       | 56 F       | 52.51 | CBT-I                                                      | behavioral placebo/desensitization | in-person (one-on-one)           | Insomnia with comorbidities   | Breast cancer survivors      | An advanced practice nurse with specialized training in CBT-I conducted the individual weekly sessions in an office setting                                                                                                                                                                                                                             | Y | 4 session (in-person group) +2 sessions (phone)                                        | N | No SD provided                                                                              |
| McCrae 2007                                         | 7M 13F     | 77.2  | BBT-I                                                      | sleep hygiene                      | in-person                        | Insomnia and no comorbidities | Elderly (65 year and older)  | mental health counselor, social worker, or provisionally licensed counselor                                                                                                                                                                                                                                                                             | N | 2 sessions + 2 telephone calls                                                         | Y | -                                                                                           |
| McCrae 2018                                         | 20M, 42F   | 69.5  | BBT-I                                                      | self-monitoring control            | in-person                        | Insomnia and no comorbidities | Older adults (65 and above)  | The therapists were three predoctoral students in UF's APAaccredited counseling psychology program                                                                                                                                                                                                                                                      | Y | 4 sessions                                                                             | Y | -                                                                                           |
| McCrae 2019                                         | 76F        | 53    | CBT-I                                                      | waitlist                           | in-person                        | CBT-I                         | Pain due to fibromyalgia     | predoctoral students in clinical psychology                                                                                                                                                                                                                                                                                                             | Y | 8 sessions                                                                             | Y | -                                                                                           |
| McCurry 2014                                        | 55M, 190F  | 73.1  | CBT-I                                                      | education control                  | group                            | Insomnia with comorbidities   | Pain                         | mental health professionals (Masters-level family counselor and PhD psychologist)                                                                                                                                                                                                                                                                       | Y | 6 weekly sessions                                                                      | N | post treatment data not provided only follow up data available                              |
| Means 2000                                          | 17M, 39F   | 21.2  | Progressive Relaxation therapy                             | waitlist                           | in-person                        | Insomnia and no comorbidities | College students             | Therapists were three graduate students trained by advanced graduate students proficient in the PR procedure.                                                                                                                                                                                                                                           | - | 3 sessions                                                                             | Y | -                                                                                           |
| Miro 2011                                           | 44F        | 46.45 | CBT-I                                                      | sleep hygiene                      | group                            | Insomnia with comorbidities   | Fibromyalgia                 | CBT therapists                                                                                                                                                                                                                                                                                                                                          | Y | 6 weekly sessions                                                                      | Y | -                                                                                           |
| Morgan 2012                                         | 65M, 128F  | 66.6  | CBT-I                                                      | usual care                         | self-help                        | Mixed                         | Older adults (55 and above)  | telephone support offered by trained advisers                                                                                                                                                                                                                                                                                                           | Y | 7 weeks                                                                                | N | Data presented as a mean change                                                             |
| Morin 1988                                          | 2M, 6F     | 67    | Relaxation therapy (imagery training)                      | waitlist                           | in-person                        | Mixed                         | Geriatrics (55 and older)    | Two advanced graduate students in clinical psychology served as therapists                                                                                                                                                                                                                                                                              | - | 6 sessions                                                                             | Y | -                                                                                           |



|                                                                             |           |                  |                                                            |                                           |                              |                               |                                                                                            |                                                                                                                                                                                                                                                                                                      |     |                                |   |                                     |
|-----------------------------------------------------------------------------|-----------|------------------|------------------------------------------------------------|-------------------------------------------|------------------------------|-------------------------------|--------------------------------------------------------------------------------------------|------------------------------------------------------------------------------------------------------------------------------------------------------------------------------------------------------------------------------------------------------------------------------------------------------|-----|--------------------------------|---|-------------------------------------|
| Morin 1988                                                                  | 8M, 11F   | 67.4             | Stimulus control                                           | waitlist                                  | group                        | Mixed                         | Older adult (55 or older)                                                                  | Two advanced graduate students in clinical psychology served as therapists                                                                                                                                                                                                                           | -   | 6 sessions                     | Y | -                                   |
| Morin 1993                                                                  | 7M, 17F   | 67.1             | CBT-I                                                      | waitlist                                  | Group                        | Insomnia and no comorbidities | Older adults (60 years or older)                                                           | A clinical psychologist conducted all therapy sessions.                                                                                                                                                                                                                                              | Y   | 8 sessions                     | Y | -                                   |
| Morin 1999                                                                  | 28M, 50F  | 65               | CBT-I                                                      | placebo drug                              | Group                        | Insomnia and no comorbidities | Older adults (defined as 55 yrs or older)                                                  | CBT sessions led by a licensed clinical psychologist or a post doctoral fellow in clinical psychology.                                                                                                                                                                                               | Y   | 8 sessions                     | Y | -                                   |
| Morin 2005                                                                  | 65M, 125F | 46               | CBT-I                                                      | waitlist                                  | self-help (manual)           | Mixed                         | -                                                                                          | -                                                                                                                                                                                                                                                                                                    | Y   | 6 booklets mailed weekly       | Y | -                                   |
| Nicassio 1974                                                               | 9M, 21F   | 45.1             | Relaxation therapy                                         | no treatment control                      | in-person                    | Mixed                         | -                                                                                          | All treatment sessions were conducted by the first author                                                                                                                                                                                                                                            | -   | 4 weeks                        | N | Number of participants not reported |
| Nicassio 1982                                                               | 9 M, 31 F | 43.5             | EMG biofeedback, Progressive Relaxation therapy,           | Biofeedback placebo, no-treatment control | in-person                    | Mixed                         | -                                                                                          | authors acted as therapists                                                                                                                                                                                                                                                                          | N/A | 10 sessions                    | Y | -                                   |
| Nicassio 1982                                                               | 9M, 31F   | 43.5             | Relaxation therapy                                         | EMG biofeedback placebo                   | in-person                    | Mixed                         | -                                                                                          | authors of this investigation acted as therapists                                                                                                                                                                                                                                                    | -   | 6 weeks                        | Y | -                                   |
| Ong 2014                                                                    | 9M, 26F   | 43.5             | Mindfulness                                                | self-monitoring                           | in-person                    | Insomnia and no comorbidities | -                                                                                          | MBTI was delivered by the first author, who has specialized training in mindfulness meditation and behavioral treatments for insomnia                                                                                                                                                                | -   | 8 week intervention            | Y | -                                   |
| Ott 1983                                                                    | 22M, 34F  | 18-55 yrs of age | Paradoxical intention                                      | no treatment                              | Group                        | Insomnia and no comorbidities | -                                                                                          | Not mentioned                                                                                                                                                                                                                                                                                        | -   | 2 week treatment               | N | Number of participants not reported |
| Pigeon 2012                                                                 | 7M, 14F   | 50.7             | CBT-I                                                      | waitlist                                  | in-person (one-on-one)       | Insomnia with comorbidities   | Chronic pain                                                                               | one of two experienced CBT psychologists familiar with both CBT-I and CBP-P                                                                                                                                                                                                                          | Y   | 10 sessions                    | Y | -                                   |
| Pigeon 2017                                                                 | 24M, 3F   | 58.4             | BBT-I                                                      | sleep hygiene                             | in-person                    | Insomnia with comorbidities   | Depressed veterans                                                                         | Study therapists in both conditions were graduate level psychology students                                                                                                                                                                                                                          | Y   | 2 sessions + 2 telephone calls | Y | -                                   |
| Riedel 1995                                                                 | 43M, 82F  | 67.4             | Sleep restriction                                          | waitlist                                  | group/video, video           | Insomnia and no comorbidities | Older adults (50 years or older)                                                           | One male and three female psychology graduate students served as therapists.                                                                                                                                                                                                                         | Y   | 4 sessions                     | Y | -                                   |
| Ritterband 2009                                                             | 10M, 34F  | 44.86            | CBT-I                                                      | waitlist                                  | internet                     | Insomnia and no comorbidities | -                                                                                          | -                                                                                                                                                                                                                                                                                                    | Y   | 9-week intervention            | Y | -                                   |
| Ritterband 2012                                                             | 4M, 24F   | 56.7             | CBT-I                                                      | waitlist                                  | internet                     | Insomnia with comorbidities   | Cancer survivors (predominantly highly-educated Caucasian women of non-Hispanic ethnicity) | -                                                                                                                                                                                                                                                                                                    | Y   | 6-9 week intervention          | Y | -                                   |
| Rybarczyk 2002                                                              | 4M, 10F   | 65.6             | Relaxation therapy (home-based audio relaxation treatment) | waitlist                                  | audio                        | Insomnia with comorbidities   | Comorbid geriatric insomnia (55 yr of age)                                                 | -                                                                                                                                                                                                                                                                                                    | -   | 6 weeks                        | Y | -                                   |
| Rybarczyk 2002                                                              | 12M, 12F  | 67.8             | CBT-I                                                      | waitlist                                  | Group                        | Insomnia with comorbidities   | comorbid geriatric insomnia (55 yr of age)                                                 | co-led by two clinical geropsychologists                                                                                                                                                                                                                                                             | Y   | 8 sessions                     | Y | -                                   |
| Rybarczyk 2005 (Behavioral Sleep Medicine) only used video and control data | 11M, 14F  | 69.5             | CBT-I                                                      | waitlist                                  | Video                        | Insomnia with comorbidities   | Older adults (55 and older)                                                                | *co-led by two clinical geropsychologists<br>*Same data as Rybarczyk 2002 for in-person and group                                                                                                                                                                                                    | Y   | 8 sessions                     | Y | -                                   |
| Rybarczyk 2005 (Journal of Consulting and Clinical Psychology)              | 30M, 62F  | 69               | CBT-I                                                      | stress management, wellness training      | Group                        | Insomnia with comorbidities   | Older adults with osteoarthritis, coronary artery disease, or pulmonary disease            | The CBT sessions were led by two clinical psychologists experienced in CBT treatment of insomnia.                                                                                                                                                                                                    | Y   | 8 sessions                     | Y | -                                   |
| Sanavio 1990                                                                | 16M, 24 F | 39.6             | EMG biofeedback                                            | waitlist                                  | in-person                    | Insomnia and no comorbidities | -                                                                                          | 3 trainees in behavior therapy served as therapists                                                                                                                                                                                                                                                  | N/A | 6 sessions                     | N | no. of participants not provided    |
| Sandlund 2017                                                               | 45M, 120F | 54.5             | CBT-I                                                      | waitlist                                  | Group                        | Mixed                         | Primary care setting                                                                       | led by nurses                                                                                                                                                                                                                                                                                        | Y   | 7 sessions                     | Y | -                                   |
| Savard 2005 (J Clin Oncol)                                                  | 57F       | 54.09            | CBT-I                                                      | waitlist                                  | Group                        | Insomnia with comorbidities   | Breast cancer survivors                                                                    | administered by a master-level psychologist with experience in the administration of this particular treatment protocol.                                                                                                                                                                             | Y   | 8 sessions                     | Y | -                                   |
| Savard 2014                                                                 | 242 F     | 54.4             | CBT-I                                                      | waitlist                                  | in-person (one-on-one) video | Insomnia with comorbidities   | Breast cancer                                                                              | CBT-I sessions were administered by certified psychologists and PhD students in clinical psychology with significant experience                                                                                                                                                                      | Y   | 6 sessions                     | Y | -                                   |
| Sidani 2019                                                                 | 91M, 164F | 54.3             | Sleep restriction, stimulus control                        | Sleep education                           | in-person                    | Mixed                         | -                                                                                          | therapist                                                                                                                                                                                                                                                                                            | -   | 6 sessions                     | Y | -                                   |
| Sivertsen 2006                                                              | 14 M, 16F | 60.8             | CBT-I                                                      | Placebo tablet                            | in-person (one-on-one)       | Mixed                         | Older adults                                                                               | The therapy sessions were facilitated by 2 clinical psychologists (B.S. and S.O.) and administered at the outpatient university clinic                                                                                                                                                               | Y   | 6 sessions                     | Y | -                                   |
| Smith 2015                                                                  | 21 M, 79F | 59.4             | CBT-I                                                      | behavioral desensitization                | in-person (one-on-one)       | Insomnia with comorbidities   | Knee Osteoarthritis                                                                        | With the exception of 2 advanced psychology doctoral candidates (1 man and 1 woman), all of the interventionists were postdoctoral clinical psychology fellows (n=5 [3 women]) or faculty (n=2) with experience in behavioral medicine. All but 2 of the interventionists delivered both treatments. | Y   | 8 sessions                     | Y | -                                   |
| Soeffing 2008                                                               | 17M, 30F  | 64.16            | CBT-I                                                      | placebo (sham biofeedback)                | in-person (one-on-one)       | Insomnia and no comorbidities | Older adults (defined as 50 yrs or older)                                                  | Advanced doctoral students in clinical psychology served as therapists                                                                                                                                                                                                                               | Y   | 8 sessions                     | N | adjusted data                       |
| Strom 2004                                                                  | 38M, 71F  | 44.1             | CBT-I                                                      | waitlist                                  | internet                     | Insomnia and no comorbidities | -                                                                                          | Two clinical psychologists served as therapists for e-mail interaction and monitoring of homework assignments                                                                                                                                                                                        | Y   | 5-week intervention            | Y | -                                   |
| Talbot 2014                                                                 | 14M, 31F  | 37               | CBT-I                                                      | waitlist                                  | in-person (one-on-one)       | Insomnia with comorbidities   | Post traumatic stress disorder                                                             | CBT-I delivered by a licensed clinical psychologist or a board-certified psychiatrist                                                                                                                                                                                                                | Y   | 8 sessions                     | Y | -                                   |
| Taylor 2014                                                                 | 20M, 14F  | 19.71            | CBT-I                                                      | waitlist                                  | in-person (one-on-one)       | Insomnia and no comorbidities | College students                                                                           | Therapy was conducted by three doctoral-level graduate students who were thoroughly trained in CBT-I and supervised by a licensed psychologist with expertise in CBT-I and certified in behavioral sleep medicine                                                                                    | Y   | 6 sessions                     | Y | -                                   |
| Taylor 2015                                                                 | 2 M, 13 F | 50.5             | CBT-I                                                      | Usual care                                | in-person (one-on-one)       | Insomnia with comorbidities   | Psychiatric comorbidity                                                                    | an advanced doctoral student with previous training and experience conducting CBT-I led all the sessions                                                                                                                                                                                             | Y   | 5 sessions                     | Y | -                                   |

|                  |            |              |                                |                                              |                                   |                               |                                  |                                                                                                                                                                                                                                 |   |                                                                                         |   |                                                               |
|------------------|------------|--------------|--------------------------------|----------------------------------------------|-----------------------------------|-------------------------------|----------------------------------|---------------------------------------------------------------------------------------------------------------------------------------------------------------------------------------------------------------------------------|---|-----------------------------------------------------------------------------------------|---|---------------------------------------------------------------|
| Taylor 2017      | 83 M, 27 F | 32.73        | CBT-I                          | Minimal contact                              | in-person (one-on-one ), internet | Mixed                         | Military personnel               | CBTI was administered by civilian licensed clinical psychologists, clinical psychology postdoctoral fellows, and a licensed clinical social worker                                                                              | Y | 6 sessions                                                                              | Y | -                                                             |
| Thiart 2015      | 33M, 85F   | 48           | CBT-I                          | waitlist                                     | internet                          | Mixed                         | teachers                         | Trained coaches                                                                                                                                                                                                                 | Y | 6 sessions                                                                              | Y | -                                                             |
| Thorndike 2013   | 10M, 34F   | 44.9         | CBT-I                          | waitlist                                     | internet                          | Insomnia with comorbidities   | -                                | online format, no clinical support or supervision provided                                                                                                                                                                      | Y | 9 weeks                                                                                 | Y | -                                                             |
| Troxel 2013      | 13M, 26F   | 72.5         | BBT-I                          | information control                          | in-person                         | Mixed                         | Older adults (60 years or older) | master's level mental health nurse.                                                                                                                                                                                             | N | 2 sessions + 2 telephone calls                                                          | N | data not presented as mean and standard deviation             |
| Tyagi 2014       | 29M, 50F   | 72.6         | BBT-I                          | information control                          | in-person                         | Insomnia with comorbidities   | Older adults                     | Therapist                                                                                                                                                                                                                       | N | 2 sessions + 2 telephone calls                                                          | N | Secondary analysis paper data already included in Buysse 2011 |
| Van Straten 2009 | 84M, 163F  | 52           | CBT-I                          | waitlist                                     | self-help (book-video)            | Mixed                         | -                                | -                                                                                                                                                                                                                               | Y | 6 week self-help intervention                                                           | Y | -                                                             |
| van Straten 2014 | 35M, 83F   | 49.4         | CBT-I                          | waitlist                                     | internet                          | Mixed                         | -                                | The coaching was performed by A.v.S., four master's students in psychology, and one experienced CBT therapist (J.E.) who also trained and supervised the others.                                                                | Y | 6-week guided internet intervention                                                     | Y | -                                                             |
| Verbeek 2006     | 24M, 34F   | 44.4         | CBT-I                          | in-person                                    | group                             | Mixed                         | -                                | -                                                                                                                                                                                                                               | Y | 6 weekly sessions                                                                       | Y | -                                                             |
| Vincent 2009     | 39M, 79F   | Not provided | CBT-I                          | waitlist                                     | internet                          | Mixed                         | -                                | The main teaching component was present in an audiovisual mode with occasional text material appearing in the background to highlight particular points                                                                         | Y | 5-week intervention                                                                     | Y | -                                                             |
| Vincent 2013     | 80M, 148F  | 49           | CBT-I                          | waitlist                                     | internet                          | Mixed                         | -                                | The main teaching component was present in an audiovisual mode with occasional text material appearing in the background to highlight particular points                                                                         | Y | 5-week intervention secondary analysis paper of Vincent 2009                            | N | Only moderating analyses present                              |
| Vitiello 2013    | 55M, 190F  | 73.1         | CBT-I                          | education control                            | group                             | Mixed                         | Osteoarthritis                   | Master's-level family counselor and PhD psychologist                                                                                                                                                                            | Y | 6 weekly sessions                                                                       | N | adjusted data                                                 |
| Wagley 2013      | 9M, 21F    | 45.9         | CBT-I                          | waitlist                                     | in-person (one-on-one )           | Insomnia with comorbidities   | Psychiatric outpatients          | The intervention was administered by the same master's level therapist with minimal experience with CBT for insomnia. The therapist was trained by a doctoral-level psychologist with extensive experience in delivering CBT-I. | Y | 2 sessions                                                                              | Y | -                                                             |
| Wang 2016        | 36M, 46F   | 41.6         | BBT-I                          | sleep hygiene                                | in-person                         | Mixed                         | -                                | Two clinical psychologists served as therapists                                                                                                                                                                                 | Y | 2 sessions + 2 telephone calls                                                          | Y | -                                                             |
| Wilckens 2016    | 25M, 54F   | 71.7         | BBT-I                          | information control                          | in-person                         | Insomnia with comorbidities   | Older adults                     | mental health nurse practitioner                                                                                                                                                                                                | Y | 2 sessions + 2 telephone calls                                                          | N | same data as Buysse 2011                                      |
| Wong 2017        | 47M, 169F  | 56.1         | Mindfulness                    | sleep psycho-education with exercise control | group                             | Insomnia and no comorbidities | -                                | the MBCT-I programme was delivered by qualified instructors with more than 2 years of teaching experience of MBCT                                                                                                               | - | 9 week intervention                                                                     | Y | -                                                             |
| Woolfolk 1976    | 6M, 18F    | 44.3         | Progressive Relaxation therapy | waitlist                                     | in-person                         | Mixed                         | -                                | 2 clinically experienced graduate students served as therapists                                                                                                                                                                 | - | 4 weeks                                                                                 | N | SD not provided                                               |
| Wu 2006          | 36 M, 41F  | 38 ± 12      | CBT-I                          | Placebo tablet                               | in-person (one-on-one )           | Insomnia and no comorbidities | -                                | The CBT group was treated by a licensed clinical psychologist, a manual was used during each session                                                                                                                            | Y | 16 sessions (All treatments lasted 8 weeks. Each patient received CBT two times a week) | Y | -                                                             |
| Yamadera 2013    | 20M, 25F   | 59.3         | CBT-I                          | in-person                                    | group                             | Insomnia and no comorbidities | -                                | Psychiatric sleep physician                                                                                                                                                                                                     | Y | 3 sessions                                                                              | Y | -                                                             |
| Zhang 2015       | 35M, 25F   | 78.1         | Mindfulness                    | waitlist                                     | group                             | Insomnia and no comorbidities | Older adults than 75 years       | Trained MBSR teacher                                                                                                                                                                                                            | - | 8 weeks                                                                                 | Y | -                                                             |
